# Supplementary material
Source: MDPI journal article supplement (https://www.mdpi.com/2306-5729/9/3/45)
Supplement: s1 [file s1]

Table S2: Darwin Core labels used for the data paper. Column descriptions were taken from the Darwin Core List of Terms, on the TDWG website (<https://dwc.tdwg.org/terms/>; accessed on 10 January 2024).

| <i>Column label</i>     | <i>Column description</i>                                                                                                                                                                                                                                                                          |
|-------------------------|----------------------------------------------------------------------------------------------------------------------------------------------------------------------------------------------------------------------------------------------------------------------------------------------------|
| <b>catalogNumber</b>    | An identifier (preferably unique) for the record within the data set or collection.                                                                                                                                                                                                                |
| <b>habitat</b>          | A category or description of the habitat in which the dwc:Event occurred.                                                                                                                                                                                                                          |
| <b>waterBody</b>        | The name of the water body in which the dcterms:Location occurs.                                                                                                                                                                                                                                   |
| <b>locality</b>         | The specific description of the place.                                                                                                                                                                                                                                                             |
| <b>decimalLatitude</b>  | The geographic latitude (in decimal degrees, using the spatial reference system given in dwc:geodeticDatum) of the geographic center of a dcterms:Location. Positive values are north of the Equator, negative values are south of it. Legal values lie between -90 and 90, inclusive.             |
| <b>decimalLongitude</b> | The geographic longitude (in decimal degrees, using the spatial reference system given in dwc:geodeticDatum) of the geographic center of a dcterms:Location. Positive values are east of the Greenwich Meridian, negative values are west of it. Legal values lie between -180 and 180, inclusive. |
| <b>phylum</b>           | The full scientific name of the phylum or division in which the dwc:Taxon is classified.                                                                                                                                                                                                           |
| <b>class</b>            | The full scientific name of the class in which the dwc:Taxon is classified.                                                                                                                                                                                                                        |
| <b>order</b>            | The full scientific name of the order in which the dwc:Taxon is classified.                                                                                                                                                                                                                        |
| <b>family</b>           | The full scientific name of the family in which the dwc:Taxon is classified.                                                                                                                                                                                                                       |

|                                 |                                                                                                                                                                                                                                                                                                                                   |
|---------------------------------|-----------------------------------------------------------------------------------------------------------------------------------------------------------------------------------------------------------------------------------------------------------------------------------------------------------------------------------|
|                                 |                                                                                                                                                                                                                                                                                                                                   |
| <b>genus</b>                    | The full scientific name of the genus in which the dwc:Taxon is classified.                                                                                                                                                                                                                                                       |
| <b>scientificName</b>           | The full scientific name, with authorship and date information if known. When forming part of an Identification, this should be the name in lowest level taxonomic rank that can be determined. This term should not contain identification qualifications, which should instead be supplied in the IdentificationQualifier term. |
| <b>scientificNameAuthorship</b> | The authorship information for the dwc:scientificName formatted according to the conventions of the applicable dwc:nomenclaturalCode.                                                                                                                                                                                             |
| <b>acceptedNameUsage</b>        | The full name, with authorship and date information if known, of the currently valid (zoological) or accepted (botanical) dwc:Taxon.                                                                                                                                                                                              |
