# Supplementary material
Source: MDPI journal article supplement (https://www.mdpi.com/2306-5729/9/3/45)
Supplement: s1 [file s1]

Archive with 2 entries (2 files):
- Table S1_Benthic species from mesophotic bioconstructions of the Apulian coast-Dataset-OK.xlsx
- Table S2.pdf
