# Supplementary material
Source: MDPI journal article supplement (https://www.mdpi.com/2306-5729/9/3/45)
Supplement: s1 [file s1 › Table S1_Benthic species from mesophotic bioconstructions of the Apulian coast-Dataset-OK.xlsx]

## Sheet: Dataset
catalogNumber	habitat	waterBody	locality	decimalLatitude	decimalLongitude	phylum	class	order	family	genus	scientificName	scientificNameAuthorship	acceptedNameUsage
1	MAB	Adriatic Sea	Otranto	40.12885900	18.520781	Rhodophyta	Florideophyceae	Corallinales	Corallinaceae	Corallina	Corallina	Linnaeus, 1758	Corallina Linnaeus, 1758
1	MAB	Ionian Sea	Santa Maria di Leuca	39.73114575	18.347193	Rhodophyta	Florideophyceae	Corallinales	Corallinaceae	Corallina	Corallina	Linnaeus, 1758	Corallina Linnaeus, 1758
2	MIB	Ionian Sea	Santa Maria di Leuca	39.73114575	18.347193	Rhodophyta	Florideophyceae	Corallinales	Corallinaceae	Jania	Jania	J.V.Lamouroux, 1812	Jania J.V.Lamouroux, 1812
2	MAB	Adriatic Sea	Otranto	40.12885900	18.520781	Rhodophyta	Florideophyceae	Corallinales	Corallinaceae	Jania	Jania	J.V.Lamouroux, 1812	Jania J.V.Lamouroux, 1812
3	MIB	Ionian Sea	Santa Maria di Leuca	39.73114575	18.347193	Rhodophyta	Florideophyceae	Corallinales	Lithophyllaceae	Amphiroa	Amphiroa	J.V.Lamouroux, 1812	Amphiroa J.V.Lamouroux, 1812
3	MAB	Adriatic Sea	Otranto	40.12885900	18.520781	Rhodophyta	Florideophyceae	Corallinales	Lithophyllaceae	Amphiroa	Amphiroa	J.V.Lamouroux, 1812	Amphiroa J.V.Lamouroux, 1812
3	MAB	Ionian Sea	Santa Maria di Leuca	39.73114575	18.347193	Rhodophyta	Florideophyceae	Corallinales	Lithophyllaceae	Amphiroa	Amphiroa	J.V.Lamouroux, 1812	Amphiroa J.V.Lamouroux, 1812
4	MIB	Ionian Sea	Santa Maria di Leuca	39.73114575	18.347193	Rhodophyta	Florideophyceae	Corallinales	Lithophyllaceae	Lithophyllum	Lithophyllum stictiforme	(J.E.Areschoug) Hauck, 1877	Lithophyllum stictiforme (J.E.Areschoug) Hauck, 1877
4	MIB	Adriatic Sea	Monopoli	40.98221667	17.28620278	Rhodophyta	Florideophyceae	Corallinales	Lithophyllaceae	Lithophyllum	Lithophyllum stictiforme	(J.E.Areschoug) Hauck, 1877	Lithophyllum stictiforme (J.E.Areschoug) Hauck, 1877
4	MAB	Adriatic Sea	Otranto	40.12885900	18.520781	Rhodophyta	Florideophyceae	Corallinales	Lithophyllaceae	Lithophyllum	Lithophyllum stictiforme	(J.E.Areschoug) Hauck, 1877	Lithophyllum stictiforme (J.E.Areschoug) Hauck, 1877
4	MAB	Ionian Sea	Santa Maria di Leuca	39.73114575	18.347193	Rhodophyta	Florideophyceae	Corallinales	Lithophyllaceae	Lithophyllum	Lithophyllum stictiforme	(J.E.Areschoug) Hauck, 1877	Lithophyllum stictiforme (J.E.Areschoug) Hauck, 1877
4	MAB	Adriatic Sea	Monopoli	40.98221667	17.28620278	Rhodophyta	Florideophyceae	Corallinales	Lithophyllaceae	Lithophyllum	Lithophyllum stictiforme	(J.E.Areschoug) Hauck, 1877	Lithophyllum stictiforme (J.E.Areschoug) Hauck, 1877
5	MIB	Adriatic Sea	Otranto	40.1288590	18.520781	Rhodophyta	Florideophyceae	Corallinales	Lithophyllaceae	Titanoderma	Titanoderma pustulatum	(J.V.Lamouroux) Nägeli, 1858	Titanoderma pustulatum (J.V.Lamouroux) Nägeli, 1858
5	MIB	Ionian Sea	Santa Maria di Leuca	39.73114575	18.347193	Rhodophyta	Florideophyceae	Corallinales	Lithophyllaceae	Titanoderma	Titanoderma pustulatum	(J.V.Lamouroux) Nägeli, 1858	Titanoderma pustulatum (J.V.Lamouroux) Nägeli, 1858
6	MIB	Adriatic Sea	Otranto	40.1288590	18.520781	Rhodophyta	Florideophyceae	Corallinales	Mesophyllumaceae	Mesophyllum	Mesophyllum alternans	(Foslie) Cabioch & M.L.Mendoza, 1998	Mesophyllum alternans (Foslie) Cabioch & M.L.Mendoza, 1998
6	MIB	Ionian Sea	Santa Maria di Leuca	39.73114575	18.347193	Rhodophyta	Florideophyceae	Corallinales	Mesophyllumaceae	Mesophyllum	Mesophyllum alternans	(Foslie) Cabioch & M.L.Mendoza, 1998	Mesophyllum alternans (Foslie) Cabioch & M.L.Mendoza, 1998
7	MIB	Adriatic Sea	Monopoli	40.98221667	17.28620278	Rhodophyta	Florideophyceae	Corallinales	Spongitaceae	Neogoniolithon	Neogoniolithon mamillosum	(Hauck) Setchell & L.R.Mason, 1943	Neogoniolithon mamillosum (Hauck) Setchell & L.R.Mason, 1943
8	MIB	Adriatic Sea	Monopoli	40.98221667	17.28620278	Rhodophyta	Florideophyceae	Ceramiales	Ceramiaceae	Antithamnion	Antithamnion tenuissimum	(Hauck) Schiffner, 1915	Antithamnion tenuissimum (Hauck) Schiffner, 1915
9	MIB	Adriatic Sea	Monopoli	40.98221667	17.28620278	Rhodophyta	Florideophyceae	Ceramiales	Ceramiaceae	Ceramium	Ceramium	Roth, 1797	Ceramium Roth, 1797
9	MAB	Ionian Sea	Santa Maria di Leuca	39.73114575	18.347193	Rhodophyta	Florideophyceae	Ceramiales	Ceramiaceae	Ceramium	Ceramium	Roth, 1798	Ceramium Roth, 1797
10	MIB	Adriatic Sea	Monopoli	40.98221667	17.28620278	Rhodophyta	Florideophyceae	Ceramiales	Delesseriaceae	Hypoglossum	Hypoglossum	Kützing, 1843	Hypoglossum Kützing, 1843
10	MAB	Ionian Sea	Santa Maria di Leuca	39.73114575	18.347193	Rhodophyta	Florideophyceae	Ceramiales	Delesseriaceae	Hypoglossum	Hypoglossum	Kützing, 1843	Hypoglossum Kützing, 1843
11	MAB	Ionian Sea	Santa Maria di Leuca	39.73114575	18.347193	Rhodophyta	Florideophyceae	Gigartinales	Dumontiaceae	Dudresnaya	Dudresnaya	P.L.Crouan & H.M.Crouan, 1835	Dudresnaya P.L.Crouan & H.M.Crouan, 1835
12	MAB	Adriatic Sea	Capitolo	40.94719344	17.449318	Rhodophyta	Florideophyceae	Peyssonneliales	Peyssonneliaceae	Peyssonnelia	Peyssonnelia squamaria	(S.G.Gmelin) Decaisne ex J.Agardh, 1842	Peyssonnelia squamaria (S.G.Gmelin) Decaisne ex J.Agardh, 1842
13	MIB	Adriatic Sea	Monopoli	40.98221667	17.28620278	Rhodophyta	Florideophyceae	Peyssonneliales	Peyssonneliaceae	Peyssonnelia	Peyssonnelia	Decaisne, 1841	Peyssonnelia Decaisne, 1841
13	MAB	Adriatic Sea	Otranto	40.12885900	18.520781	Rhodophyta	Florideophyceae	Peyssonneliales	Peyssonneliaceae	Peyssonnelia	Peyssonnelia	Decaisne, 1841	Peyssonnelia Decaisne, 1841
13	MAB	Ionian Sea	Santa Maria di Leuca	39.73114575	18.347193	Rhodophyta	Florideophyceae	Peyssonneliales	Peyssonneliaceae	Peyssonnelia	Peyssonnelia	Decaisne, 1841	Peyssonnelia Decaisne, 1841
13	MAB	Adriatic Sea	Monopoli	40.98221667	17.28620278	Rhodophyta	Florideophyceae	Peyssonneliales	Peyssonneliaceae	Peyssonnelia	Peyssonnelia	Decaisne, 1841	Peyssonnelia Decaisne, 1841
13	MAB	Adriatic Sea	Capitolo	40.94719344	17.449318	Rhodophyta	Florideophyceae	Peyssonneliales	Peyssonneliaceae	Peyssonnelia	Peyssonnelia	Decaisne, 1841	Peyssonnelia Decaisne, 1841
13	MAB	Adriatic Sea	Tremiti	42.1382530	15.52244	Rhodophyta	Florideophyceae	Peyssonneliales	Peyssonneliaceae	Peyssonnelia	Peyssonnelia	Decaisne, 1841	Peyssonnelia Decaisne, 1841
13	MAB	Adriatic Sea	San Foca	40.32417820	18.46629286	Rhodophyta	Florideophyceae	Peyssonneliales	Peyssonneliaceae	Peyssonnelia	Peyssonnelia	Decaisne, 1841	Peyssonnelia Decaisne, 1841
14	MIB	Adriatic Sea	Monopoli	40.98221667	17.28620278	Rhodophyta	Florideophyceae	Rhodymeniales	Rhodymeniaceae	Rhodymenia	Rhodymenia	Greville, 1830	Rhodymenia Greville, 1830
15	MIB	Adriatic Sea	Monopoli	40.98221667	17.28620278	Rhodophyta	Stylonematophyceae	Stylonematales	Stylonemataceae	Stylonema	Stylonema alsidii	(Zanardini) K.M.Drew, 1956	Stylonema alsidii (Zanardini) K.M.Drew, 1956
16	MAB	Adriatic Sea	Otranto	40.12885900	18.520781	Chlorophyta	Pyramimonadophyceae	Palmophyllales	Palmophyllaceae	Palmophyllum	Palmophyllum crassum	(Naccari) Rabenhorst, 1868	Palmophyllum crassum (Naccari) Rabenhorst, 1868
17	MAB	Adriatic Sea	Otranto	40.12885900	18.520781	Chlorophyta	Ulvophyceae	Bryopsidales	Caulerpaceae	Caulerpa	Caulerpa cylindracea	Sonder, 1845	Caulerpa cylindracea Sonder, 1845
17	MAB	Ionian Sea	Santa Maria di Leuca	39.73114575	18.347193	Chlorophyta	Ulvophyceae	Bryopsidales	Caulerpaceae	Caulerpa	Caulerpa cylindracea	Sonder, 1845	Caulerpa cylindracea Sonder, 1845
17	MAB	Adriatic Sea	Capitolo	40.94719344	17.449318	Chlorophyta	Ulvophyceae	Bryopsidales	Caulerpaceae	Caulerpa	Caulerpa cylindracea	Sonder, 1845	Caulerpa cylindracea Sonder, 1845
17	MAB	Adriatic Sea	Tremiti	42.1382530	15.52244	Chlorophyta	Ulvophyceae	Bryopsidales	Caulerpaceae	Caulerpa	Caulerpa cylindracea	Sonder, 1845	Caulerpa cylindracea Sonder, 1845
18	MAB	Ionian Sea	Santa Maria di Leuca	39.73114575	18.347193	Chlorophyta	Ulvophyceae	Bryopsidales	Caulerpaceae	Caulerpa	Caulerpa prolifera	(Forsskål) J.V.Lamouroux, 1809	Caulerpa prolifera (Forsskål) J.V.Lamouroux, 1809
19	MAB	Adriatic Sea	Otranto	40.12885900	18.520781	Chlorophyta	Ulvophyceae	Bryopsidales	Codiaceae	Codium	Codium bursa	(Olivi) C.Agardh, 1817	Codium bursa (Olivi) C.Agardh, 1817
19	MAB	Ionian Sea	Santa Maria di Leuca	39.73114575	18.347193	Chlorophyta	Ulvophyceae	Bryopsidales	Codiaceae	Codium	Codium bursa	(Olivi) C.Agardh, 1817	Codium bursa (Olivi) C.Agardh, 1817
19	MAB	Adriatic Sea	Capitolo	40.94719344	17.449318	Chlorophyta	Ulvophyceae	Bryopsidales	Codiaceae	Codium	Codium bursa	(Olivi) C.Agardh, 1817	Codium bursa (Olivi) C.Agardh, 1817
19	MAB	Adriatic Sea	Tremiti	42.1382530	15.52244	Chlorophyta	Ulvophyceae	Bryopsidales	Codiaceae	Codium	Codium bursa	(Olivi) C.Agardh, 1817	Codium bursa (Olivi) C.Agardh, 1817
19	MAB	Adriatic Sea	San Foca	40.32417820	18.46629286	Chlorophyta	Ulvophyceae	Bryopsidales	Codiaceae	Codium	Codium bursa	(Olivi) C.Agardh, 1817	Codium bursa (Olivi) C.Agardh, 1817
20	MAB	Adriatic Sea	Otranto	40.12885900	18.520781	Chlorophyta	Ulvophyceae	Bryopsidales	Udoteaceae	Flabellia	Flabellia petiolata	(Turra) Nizamuddin, 1987	Flabellia petiolata (Turra) Nizamuddin, 1987
20	MAB	Ionian Sea	Santa Maria di Leuca	39.73114575	18.347193	Chlorophyta	Ulvophyceae	Bryopsidales	Udoteaceae	Flabellia	Flabellia petiolata	(Turra) Nizamuddin, 1987	Flabellia petiolata (Turra) Nizamuddin, 1987
20	MAB	Adriatic Sea	San Foca	40.32417820	18.46629286	Chlorophyta	Ulvophyceae	Bryopsidales	Udoteaceae	Flabellia	Flabellia petiolata	(Turra) Nizamuddin, 1987	Flabellia petiolata (Turra) Nizamuddin, 1987
21	MAB	Adriatic Sea	Otranto	40.12885900	18.520781	Chlorophyta	Ulvophyceae	Bryopsidales	Halimedaceae	Halimeda	Halimeda tuna	(J.Ellis & Solander) J.V.Lamouroux, 1816	Halimeda tuna (J.Ellis & Solander) J.V.Lamouroux, 1816
21	MAB	Ionian Sea	Santa Maria di Leuca	39.73114575	18.347193	Chlorophyta	Ulvophyceae	Bryopsidales	Halimedaceae	Halimeda	Halimeda tuna	(J.Ellis & Solander) J.V.Lamouroux, 1816	Halimeda tuna (J.Ellis & Solander) J.V.Lamouroux, 1816
21	MAB	Adriatic Sea	Capitolo	40.94719344	17.449318	Chlorophyta	Ulvophyceae	Bryopsidales	Halimedaceae	Halimeda	Halimeda tuna	(J.Ellis & Solander) J.V.Lamouroux, 1816	Halimeda tuna (J.Ellis & Solander) J.V.Lamouroux, 1816
21	MAB	Adriatic Sea	Tremiti	42.1382530	15.52244	Chlorophyta	Ulvophyceae	Bryopsidales	Halimedaceae	Halimeda	Halimeda tuna	(J.Ellis & Solander) J.V.Lamouroux, 1816	Halimeda tuna (J.Ellis & Solander) J.V.Lamouroux, 1816
21	MAB	Adriatic Sea	San Foca	40.32417820	18.46629286	Chlorophyta	Ulvophyceae	Bryopsidales	Halimedaceae	Halimeda	Halimeda tuna	(J.Ellis & Solander) J.V.Lamouroux, 1816	Halimeda tuna (J.Ellis & Solander) J.V.Lamouroux, 1816
22	MAB	Ionian Sea	Santa Maria di Leuca	39.73114575	18.347193	Ochrophyta	Phaeophyceae	Dictyotales	Dictyotaceae	Dictyopteris	Dictyopteris polypodioides	(A.P.De Candolle) J.V.Lamouroux, 1809	Dictyopteris polypodioides (A.P.De Candolle) J.V.Lamouroux, 1809
22	MAB	Adriatic Sea	Tremiti	42.1382530	15.52244	Ochrophyta	Phaeophyceae	Dictyotales	Dictyotaceae	Dictyopteris	Dictyopteris polypodioides	(A.P.De Candolle) J.V.Lamouroux, 1809	Dictyopteris polypodioides (A.P.De Candolle) J.V.Lamouroux, 1809
23	MAB	Adriatic Sea	Otranto	40.12885900	18.520781	Ochrophyta	Phaeophyceae	Dictyotales	Dictyotaceae	Dictyota	Dictyota dichotoma	(Hudson) J.V.Lamouroux, 1809	Dictyota dichotoma (Hudson) J.V.Lamouroux, 1809
23	MAB	Ionian Sea	Santa Maria di Leuca	39.73114575	18.347193	Ochrophyta	Phaeophyceae	Dictyotales	Dictyotaceae	Dictyota	Dictyota dichotoma	(Hudson) J.V.Lamouroux, 1809	Dictyota dichotoma (Hudson) J.V.Lamouroux, 1809
23	MAB	Adriatic Sea	Tremiti	42.1382530	15.52244	Ochrophyta	Phaeophyceae	Dictyotales	Dictyotaceae	Dictyota	Dictyota dichotoma	(Hudson) J.V.Lamouroux, 1809	Dictyota dichotoma (Hudson) J.V.Lamouroux, 1809
24	MAB	Adriatic Sea	Otranto	40.12885900	18.520781	Ochrophyta	Phaeophyceae	Dictyotales	Dictyotaceae	Dictyota	Dictyota	J.V.Lamouroux, 1809	Dictyota J.V.Lamouroux, 1809
25	MAB	Adriatic Sea	Otranto	40.12885900	18.520781	Ochrophyta	Phaeophyceae	Dictyotales	Dictyotaceae	Padina	Padina pavonica	(Linnaeus) Thivy, 1960	Padina pavonica (Linnaeus) Thivy, 1960
25	MAB	Ionian Sea	Santa Maria di Leuca	39.73114575	18.347193	Ochrophyta	Phaeophyceae	Dictyotales	Dictyotaceae	Padina	Padina pavonica	(Linnaeus) Thivy, 1960	Padina pavonica (Linnaeus) Thivy, 1960
25	MAB	Adriatic Sea	San Foca	40.32417820	18.46629286	Ochrophyta	Phaeophyceae	Dictyotales	Dictyotaceae	Padina	Padina pavonica	(Linnaeus) Thivy, 1960	Padina pavonica (Linnaeus) Thivy, 1960
26	MAB	Adriatic Sea	Tremiti	42.1382530	15.52244	Ochrophyta	Phaeophyceae	Dictyotales	Dictyotaceae	Zonaria	Zonaria tournefortii	(J.V.Lamouroux) Montagne, 1846	Zonaria tournefortii (J.V.Lamouroux) Montagne, 1846
27	MAB	Adriatic Sea	Tremiti	42.1382530	15.52244	Ochrophyta	Phaeophyceae	Tilopteridales	Cutleriaceae	Zanardinia	Zanardinia typus	(Nardo) P.C.Silva, 2000	Zanardinia typus (Nardo) P.C.Silva, 2000
28	MAB	Adriatic Sea	Otranto	40.12885900	18.520781	Porifera	Calcarea	Clathrinida	Clathrinidae	Clathrina	Clathrina coriacea	(Montagu, 1814)	Clathrina coriacea (Montagu, 1814)
29	MAB	Adriatic Sea	Monopoli	40.98221667	17.28620278	Porifera	Calcarea	Clathrinida	Clathrinidae	Clathrina	Clathrina rubra	Sarà, 1958	Clathrina rubra Sarà, 1958
30	MAB	Adriatic Sea	Monopoli	40.98221667	17.28620278	Porifera	Calcarea	Leucosolenida	Leucosoleniidae	Leucosolenia	Leucosolenia variabilis	Haeckel, 1870	Leucosolenia variabilis Haeckel, 1870
31	MAB	Ionian Sea	Santa Maria di Leuca	39.73114575	18.347193	Porifera	Calcarea	Leucosolenida	Syconidae	Sycon	Sycon ciliatum	(Fabricius, 1780)	Sycon ciliatum (Fabricius, 1780)
32	MIB	Adriatic Sea	Otranto	40.1288590	18.520781	Porifera	Demospongiae	Agelasida	Agelasidae	Agelas	Agelas oroides	(Schmidt, 1864)	Agelas oroides (Schmidt, 1864)
32	MIB	Ionian Sea	Santa Maria di Leuca	39.73114575	18.347193	Porifera	Demospongiae	Agelasida	Agelasidae	Agelas	Agelas oroides	(Schmidt, 1864)	Agelas oroides (Schmidt, 1864)
32	MIB	Adriatic Sea	Monopoli	40.98221667	17.28620278	Porifera	Demospongiae	Agelasida	Agelasidae	Agelas	Agelas oroides	(Schmidt, 1864)	Agelas oroides (Schmidt, 1864)
32	MIB	Adriatic Sea	Tremiti	42.13825300	15.522442	Porifera	Demospongiae	Agelasida	Agelasidae	Agelas	Agelas oroides	(Schmidt, 1864)	Agelas oroides (Schmidt, 1864)
32	MIB	Adriatic Sea	San Foca	40.3241782	18.4662928	Porifera	Demospongiae	Agelasida	Agelasidae	Agelas	Agelas oroides	(Schmidt, 1864)	Agelas oroides (Schmidt, 1864)
32	MAB	Adriatic Sea	Otranto	40.12885900	18.520781	Porifera	Demospongiae	Agelasida	Agelasidae	Agelas	Agelas oroides	(Schmidt, 1864)	Agelas oroides (Schmidt, 1864)
32	MAB	Ionian Sea	Santa Maria di Leuca	39.73114575	18.347193	Porifera	Demospongiae	Agelasida	Agelasidae	Agelas	Agelas oroides	(Schmidt, 1864)	Agelas oroides (Schmidt, 1864)
32	MAB	Adriatic Sea	Monopoli	40.98221667	17.28620278	Porifera	Demospongiae	Agelasida	Agelasidae	Agelas	Agelas oroides	(Schmidt, 1864)	Agelas oroides (Schmidt, 1864)
32	MAB	Adriatic Sea	Capitolo	40.94719344	17.449318	Porifera	Demospongiae	Agelasida	Agelasidae	Agelas	Agelas oroides	(Schmidt, 1864)	Agelas oroides (Schmidt, 1864)
32	MAB	Adriatic Sea	Tremiti	42.1382530	15.52244	Porifera	Demospongiae	Agelasida	Agelasidae	Agelas	Agelas oroides	(Schmidt, 1864)	Agelas oroides (Schmidt, 1864)
32	MAB	Adriatic Sea	San Foca	40.32417820	18.46629286	Porifera	Demospongiae	Agelasida	Agelasidae	Agelas	Agelas oroides	(Schmidt, 1864)	Agelas oroides (Schmidt, 1864)
33	MAB	Adriatic Sea	Monopoli	40.98221667	17.28620278	Porifera	Demospongiae	Agelasida	Hymerhabdiidae	Hymerhabdia	Hymerhabdia intermedia	Sarà & Siribelli, 1960	Hymerhabdia intermedia Sarà & Siribelli, 1960
33	MAB	Adriatic Sea	Capitolo	40.94719344	17.449318	Porifera	Demospongiae	Agelasida	Hymerhabdiidae	Hymerhabdia	Hymerhabdia intermedia	Sarà & Siribelli, 1960	Hymerhabdia intermedia Sarà & Siribelli, 1960
34	MIB	Adriatic Sea	Otranto	40.1288590	18.520781	Porifera	Demospongiae	Agelasida	Hymerhabdiidae	Prosuberites	Prosuberites longispinus	Topsent, 1893	Prosuberites longispinus Topsent, 1893
34	MIB	Adriatic Sea	Monopoli	40.98221667	17.28620278	Porifera	Demospongiae	Agelasida	Hymerhabdiidae	Prosuberites	Prosuberites longispinus	Topsent, 1893	Prosuberites longispinus Topsent, 1893
34	MIB	Adriatic Sea	Capitolo	40.94719344	17.449318	Porifera	Demospongiae	Agelasida	Hymerhabdiidae	Prosuberites	Prosuberites longispinus	Topsent, 1893	Prosuberites longispinus Topsent, 1893
34	MIB	Adriatic Sea	San Foca	40.3241782	18.4662928	Porifera	Demospongiae	Agelasida	Hymerhabdiidae	Prosuberites	Prosuberites longispinus	Topsent, 1893	Prosuberites longispinus Topsent, 1893
34	MAB	Adriatic Sea	Monopoli	40.98221667	17.28620278	Porifera	Demospongiae	Agelasida	Hymerhabdiidae	Prosuberites	Prosuberites longispinus	Topsent, 1893	Prosuberites longispinus Topsent, 1893
34	MAB	Adriatic Sea	Capitolo	40.94719344	17.449318	Porifera	Demospongiae	Agelasida	Hymerhabdiidae	Prosuberites	Prosuberites longispinus	Topsent, 1893	Prosuberites longispinus Topsent, 1893
34	MAB	Adriatic Sea	San Foca	40.32417820	18.46629286	Porifera	Demospongiae	Agelasida	Hymerhabdiidae	Prosuberites	Prosuberites longispinus	Topsent, 1893	Prosuberites longispinus Topsent, 1893
35	MIB	Adriatic Sea	Otranto	40.1288590	18.520781	Porifera	Demospongiae	Axinellida	Axinellidae	Axinella	Axinella cannabina	(Esper, 1794)	Axinella cannabina (Esper, 1794)
35	MIB	Ionian Sea	Santa Maria di Leuca	39.73114575	18.347193	Porifera	Demospongiae	Axinellida	Axinellidae	Axinella	Axinella cannabina	(Esper, 1794)	Axinella cannabina (Esper, 1794)
35	MIB	Adriatic Sea	Monopoli	40.98221667	17.28620278	Porifera	Demospongiae	Axinellida	Axinellidae	Axinella	Axinella cannabina	(Esper, 1794)	Axinella cannabina (Esper, 1794)
35	MIB	Adriatic Sea	Capitolo	40.94719344	17.449318	Porifera	Demospongiae	Axinellida	Axinellidae	Axinella	Axinella cannabina	(Esper, 1794)	Axinella cannabina (Esper, 1794)
35	MIB	Adriatic Sea	San Foca	40.3241782	18.4662928	Porifera	Demospongiae	Axinellida	Axinellidae	Axinella	Axinella cannabina	(Esper, 1794)	Axinella cannabina (Esper, 1794)
35	MAB	Adriatic Sea	Otranto	40.12885900	18.520781	Porifera	Demospongiae	Axinellida	Axinellidae	Axinella	Axinella cannabina	(Esper, 1794)	Axinella cannabina (Esper, 1794)
35	MAB	Ionian Sea	Santa Maria di Leuca	39.73114575	18.347193	Porifera	Demospongiae	Axinellida	Axinellidae	Axinella	Axinella cannabina	(Esper, 1794)	Axinella cannabina (Esper, 1794)
35	MAB	Adriatic Sea	Monopoli	40.98221667	17.28620278	Porifera	Demospongiae	Axinellida	Axinellidae	Axinella	Axinella cannabina	(Esper, 1794)	Axinella cannabina (Esper, 1794)
35	MAB	Adriatic Sea	San Foca	40.32417820	18.46629286	Porifera	Demospongiae	Axinellida	Axinellidae	Axinella	Axinella cannabina	(Esper, 1794)	Axinella cannabina (Esper, 1794)
36	MIB	Adriatic Sea	Otranto	40.1288590	18.520781	Porifera	Demospongiae	Axinellida	Axinellidae	Axinella	Axinella damicornis	(Esper, 1794)	Axinella damicornis (Esper, 1794)
36	MIB	Ionian Sea	Santa Maria di Leuca	39.73114575	18.347193	Porifera	Demospongiae	Axinellida	Axinellidae	Axinella	Axinella damicornis	(Esper, 1794)	Axinella damicornis (Esper, 1794)
36	MIB	Adriatic Sea	Monopoli	40.98221667	17.28620278	Porifera	Demospongiae	Axinellida	Axinellidae	Axinella	Axinella damicornis	(Esper, 1794)	Axinella damicornis (Esper, 1794)
36	MIB	Adriatic Sea	Capitolo	40.94719344	17.449318	Porifera	Demospongiae	Axinellida	Axinellidae	Axinella	Axinella damicornis	(Esper, 1794)	Axinella damicornis (Esper, 1794)
36	MIB	Adriatic Sea	Tremiti	42.13825300	15.522442	Porifera	Demospongiae	Axinellida	Axinellidae	Axinella	Axinella damicornis	(Esper, 1794)	Axinella damicornis (Esper, 1794)
36	MIB	Adriatic Sea	San Foca	40.3241782	18.4662928	Porifera	Demospongiae	Axinellida	Axinellidae	Axinella	Axinella damicornis	(Esper, 1794)	Axinella damicornis (Esper, 1794)
36	MAB	Adriatic Sea	Otranto	40.12885900	18.520781	Porifera	Demospongiae	Axinellida	Axinellidae	Axinella	Axinella damicornis	(Esper, 1794)	Axinella damicornis (Esper, 1794)
36	MAB	Ionian Sea	Santa Maria di Leuca	39.73114575	18.347193	Porifera	Demospongiae	Axinellida	Axinellidae	Axinella	Axinella damicornis	(Esper, 1794)	Axinella damicornis (Esper, 1794)
36	MAB	Adriatic Sea	Monopoli	40.98221667	17.28620278	Porifera	Demospongiae	Axinellida	Axinellidae	Axinella	Axinella damicornis	(Esper, 1794)	Axinella damicornis (Esper, 1794)
36	MAB	Adriatic Sea	Tremiti	42.1382530	15.52244	Porifera	Demospongiae	Axinellida	Axinellidae	Axinella	Axinella damicornis	(Esper, 1794)	Axinella damicornis (Esper, 1794)
37	MIB	Ionian Sea	Santa Maria di Leuca	39.73114575	18.347193	Porifera	Demospongiae	Axinellida	Axinellidae	Axinella	Axinella polypoides	Schmidt, 1862	Axinella polypoides Schmidt, 1862
37	MIB	Adriatic Sea	Monopoli	40.98221667	17.28620278	Porifera	Demospongiae	Axinellida	Axinellidae	Axinella	Axinella polypoides	Schmidt, 1862	Axinella polypoides Schmidt, 1862
37	MAB	Adriatic Sea	Otranto	40.12885900	18.520781	Porifera	Demospongiae	Axinellida	Axinellidae	Axinella	Axinella polypoides	Schmidt, 1862	Axinella polypoides Schmidt, 1862
37	MAB	Ionian Sea	Santa Maria di Leuca	39.73114575	18.347193	Porifera	Demospongiae	Axinellida	Axinellidae	Axinella	Axinella polypoides	Schmidt, 1862	Axinella polypoides Schmidt, 1862
38	MIB	Adriatic Sea	Capitolo	40.94719344	17.449318	Porifera	Demospongiae	Axinellida	Axinellidae	Axinella	Axinella pyramidata	Stephens, 1916	Axinella pyramidata Stephens, 1916
39	MAB	Adriatic Sea	Monopoli	40.98221667	17.28620278	Porifera	Demospongiae	Axinellida	Axinellidae	Axinella	Axinella rugosa	(Bowerbank, 1866)	Axinella rugosa (Bowerbank, 1866)
40	MIB	Adriatic Sea	Otranto	40.1288590	18.520781	Porifera	Demospongiae	Axinellida	Axinellidae	Axinella	Axinella verrucosa	(Esper, 1794)	Axinella verrucosa (Esper, 1794)
40	MIB	Ionian Sea	Santa Maria di Leuca	39.73114575	18.347193	Porifera	Demospongiae	Axinellida	Axinellidae	Axinella	Axinella verrucosa	(Esper, 1794)	Axinella verrucosa (Esper, 1794)
40	MIB	Adriatic Sea	Monopoli	40.98221667	17.28620278	Porifera	Demospongiae	Axinellida	Axinellidae	Axinella	Axinella verrucosa	(Esper, 1794)	Axinella verrucosa (Esper, 1794)
40	MIB	Adriatic Sea	Capitolo	40.94719344	17.449318	Porifera	Demospongiae	Axinellida	Axinellidae	Axinella	Axinella verrucosa	(Esper, 1794)	Axinella verrucosa (Esper, 1794)
40	MIB	Adriatic Sea	Tremiti	42.13825300	15.522442	Porifera	Demospongiae	Axinellida	Axinellidae	Axinella	Axinella verrucosa	(Esper, 1794)	Axinella verrucosa (Esper, 1794)
40	MIB	Adriatic Sea	San Foca	40.3241782	18.4662928	Porifera	Demospongiae	Axinellida	Axinellidae	Axinella	Axinella verrucosa	(Esper, 1794)	Axinella verrucosa (Esper, 1794)
40	MAB	Adriatic Sea	Otranto	40.12885900	18.520781	Porifera	Demospongiae	Axinellida	Axinellidae	Axinella	Axinella verrucosa	(Esper, 1794)	Axinella verrucosa (Esper, 1794)
40	MAB	Ionian Sea	Santa Maria di Leuca	39.73114575	18.347193	Porifera	Demospongiae	Axinellida	Axinellidae	Axinella	Axinella verrucosa	(Esper, 1794)	Axinella verrucosa (Esper, 1794)
40	MAB	Adriatic Sea	Tremiti	42.1382530	15.52244	Porifera	Demospongiae	Axinellida	Axinellidae	Axinella	Axinella verrucosa	(Esper, 1794)	Axinella verrucosa (Esper, 1794)
40	MAB	Adriatic Sea	San Foca	40.32417820	18.46629286	Porifera	Demospongiae	Axinellida	Axinellidae	Axinella	Axinella verrucosa	(Esper, 1794)	Axinella verrucosa (Esper, 1794)
41	MIB	Adriatic Sea	Capitolo	40.94719344	17.449318	Porifera	Demospongiae	Axinellida	Axinellidae	Axinella	Axinella	Schmidt, 1862	Axinella Schmidt, 1862
41	MIB	Adriatic Sea	Tremiti	42.13825300	15.522442	Porifera	Demospongiae	Axinellida	Axinellidae	Axinella	Axinella	Schmidt, 1862	Axinella Schmidt, 1862
41	MAB	Adriatic Sea	Tremiti	42.1382530	15.52244	Porifera	Demospongiae	Axinellida	Axinellidae	Axinella	Axinella	Schmidt, 1862	Axinella Schmidt, 1862
42	MAB	Adriatic Sea	Capitolo	40.94719344	17.449318	Porifera	Demospongiae	Axinellida	Raspailiidae	Aulospongus	Aulospongus spinosus	(Topsent, 1927)	Aulospongus spinosus (Topsent, 1927)
43	MAB	Adriatic Sea	Otranto	40.12885900	18.520781	Porifera	Demospongiae	Axinellida	Raspailiidae	Didiscus	Didiscus stylifer	Tsurnamal, 1969	Didiscus stylifer Tsurnamal, 1969
44	MIB	Adriatic Sea	Monopoli	40.98221667	17.28620278	Porifera	Demospongiae	Axinellida	Raspailiidae	Eurypon	Eurypon cinctum	Sarà, 1960	Eurypon cinctum Sarà, 1960
45	MAB	Adriatic Sea	Monopoli	40.98221667	17.28620278	Porifera	Demospongiae	Axinellida	Raspailiidae	Eurypon	Eurypon clavatum	(Bowerbank, 1866)	Eurypon clavatum (Bowerbank, 1866)
46	MIB	Adriatic Sea	Otranto	40.1288590	18.520781	Porifera	Demospongiae	Axinellida	Raspailiidae	Eurypon	Eurypon denisae	Vacelet, 1969	Eurypon denisae Vacelet, 1969
46	MAB	Adriatic Sea	San Foca	40.32417820	18.46629286	Porifera	Demospongiae	Axinellida	Raspailiidae	Eurypon	Eurypon denisae	Vacelet, 1969	Eurypon denisae Vacelet, 1969
47	MIB	Adriatic Sea	Tremiti	42.13825300	15.522442	Porifera	Demospongiae	Axinellida	Raspailiidae	Eurypon	Eurypon lacazei	(Topsent, 1891)	Eurypon lacazei (Topsent, 1891)
48	MIB	Adriatic Sea	Capitolo	40.94719344	17.449318	Porifera	Demospongiae	Axinellida	Raspailiidae	Eurypon	Eurypon major	Sarà & Siribelli, 1960	Eurypon major Sarà & Siribelli, 1960
48	MAB	Adriatic Sea	Monopoli	40.98221667	17.28620278	Porifera	Demospongiae	Axinellida	Raspailiidae	Eurypon	Eurypon major	Sarà & Siribelli, 1960	Eurypon major Sarà & Siribelli, 1960
48	MAB	Adriatic Sea	Capitolo	40.94719344	17.449318	Porifera	Demospongiae	Axinellida	Raspailiidae	Eurypon	Eurypon major	Sarà & Siribelli, 1960	Eurypon major Sarà & Siribelli, 1960
48	MAB	Adriatic Sea	Tremiti	42.1382530	15.52244	Porifera	Demospongiae	Axinellida	Raspailiidae	Eurypon	Eurypon major	Sarà & Siribelli, 1960	Eurypon major Sarà & Siribelli, 1960
49	MIB	Adriatic Sea	Otranto	40.1288590	18.520781	Porifera	Demospongiae	Axinellida	Raspailiidae	Eurypon	Eurypon viride	(Topsent, 1889)	Eurypon viride (Topsent, 1889)
49	MIB	Adriatic Sea	Monopoli	40.98221667	17.28620278	Porifera	Demospongiae	Axinellida	Raspailiidae	Eurypon	Eurypon viride	(Topsent, 1889)	Eurypon viride (Topsent, 1889)
49	MAB	Adriatic Sea	San Foca	40.32417820	18.46629286	Porifera	Demospongiae	Axinellida	Raspailiidae	Eurypon	Eurypon viride	(Topsent, 1889)	Eurypon viride (Topsent, 1889)
50	MIB	Adriatic Sea	Capitolo	40.94719344	17.449318	Porifera	Demospongiae	Axinellida	Raspailiidae	Eurypon	Eurypon	Gray, 1867	Eurypon Gray, 1867
50	MAB	Adriatic Sea	San Foca	40.32417820	18.46629286	Porifera	Demospongiae	Axinellida	Raspailiidae	Eurypon	Eurypon	Gray, 1867	Eurypon Gray, 1867
51	MIB	Adriatic Sea	Otranto	40.1288590	18.520781	Porifera	Demospongiae	Axinellida	Raspailiidae	Raspaciona	Raspaciona aculeata	(Johnston, 1842)	Raspaciona aculeata (Johnston, 1842)
51	MIB	Ionian Sea	Santa Maria di Leuca	39.73114575	18.347193	Porifera	Demospongiae	Axinellida	Raspailiidae	Raspaciona	Raspaciona aculeata	(Johnston, 1842)	Raspaciona aculeata (Johnston, 1842)
51	MIB	Adriatic Sea	Monopoli	40.98221667	17.28620278	Porifera	Demospongiae	Axinellida	Raspailiidae	Raspaciona	Raspaciona aculeata	(Johnston, 1842)	Raspaciona aculeata (Johnston, 1842)
51	MIB	Adriatic Sea	Capitolo	40.94719344	17.449318	Porifera	Demospongiae	Axinellida	Raspailiidae	Raspaciona	Raspaciona aculeata	(Johnston, 1842)	Raspaciona aculeata (Johnston, 1842)
51	MIB	Adriatic Sea	Tremiti	42.13825300	15.522442	Porifera	Demospongiae	Axinellida	Raspailiidae	Raspaciona	Raspaciona aculeata	(Johnston, 1842)	Raspaciona aculeata (Johnston, 1842)
51	MIB	Adriatic Sea	San Foca	40.3241782	18.4662928	Porifera	Demospongiae	Axinellida	Raspailiidae	Raspaciona	Raspaciona aculeata	(Johnston, 1842)	Raspaciona aculeata (Johnston, 1842)
51	MAB	Ionian Sea	Santa Maria di Leuca	39.73114575	18.347193	Porifera	Demospongiae	Axinellida	Raspailiidae	Raspaciona	Raspaciona aculeata	(Johnston, 1842)	Raspaciona aculeata (Johnston, 1842)
51	MAB	Adriatic Sea	Monopoli	40.98221667	17.28620278	Porifera	Demospongiae	Axinellida	Raspailiidae	Raspaciona	Raspaciona aculeata	(Johnston, 1842)	Raspaciona aculeata (Johnston, 1842)
51	MAB	Adriatic Sea	Tremiti	42.1382530	15.52244	Porifera	Demospongiae	Axinellida	Raspailiidae	Raspaciona	Raspaciona aculeata	(Johnston, 1842)	Raspaciona aculeata (Johnston, 1842)
52	MIB	Adriatic Sea	Monopoli	40.98221667	17.28620278	Porifera	Demospongiae	Axinellida	Raspailiidae	Raspaciona	Raspaciona calva	Sarà, 1958	Raspaciona calva Sarà, 1958
53	MAB	Adriatic Sea	Tremiti	42.1382530	15.52244	Porifera	Demospongiae	Axinellida	Raspailiidae	Raspailia	Raspailia (Raspailia) virgultosa	(Bowerbank, 1866)	Raspailia (Raspailia) virgultosa (Bowerbank, 1866)
54	MAB	Adriatic Sea	Capitolo	40.94719344	17.449318	Porifera	Demospongiae	Axinellida	Raspailiidae	Raspailia	Raspailia	Nardo, 1833	Raspailia Nardo, 1833
55	MIB	Adriatic Sea	San Foca	40.3241782	18.4662928	Porifera	Demospongiae	Axinellida	Stelligeridae	Higginsia	Higginsia	Higgin, 1877	Higginsia Higgin, 1877
56	MIB	Adriatic Sea	Monopoli	40.98221667	17.28620278	Porifera	Demospongiae	Biemnida	Biemnidae	Biemna	Biemna partenopea	Pulitzer-Finali, 1978	Biemna partenopea Pulitzer-Finali, 1978
56	MAB	Adriatic Sea	Capitolo	40.94719344	17.449318	Porifera	Demospongiae	Biemnida	Biemnidae	Biemna	Biemna partenopea	Pulitzer-Finali, 1978	Biemna partenopea Pulitzer-Finali, 1978
57	MAB	Adriatic Sea	Monopoli	40.98221667	17.28620278	Porifera	Demospongiae	Biemnida	Biemnidae	Biemna	Biemna variantia	(Bowerbank, 1858)	Biemna variantia (Bowerbank, 1858)
58	MIB	Adriatic Sea	Otranto	40.1288590	18.520781	Porifera	Demospongiae	Biemnida	Rhabderemiidae	Rhabderemia	Rhabderemia topsenti	van Soest & Hooper, 1993	Rhabderemia topsenti van Soest & Hooper, 1993
59	MIB	Ionian Sea	Santa Maria di Leuca	39.73114575	18.347193	Porifera	Demospongiae	Bubarida	Bubaridae	Bubaris	Bubaris carcisis	Vacelet, 1969	Bubaris carcisis Vacelet, 1969
60	MAB	Adriatic Sea	Monopoli	40.98221667	17.28620278	Porifera	Demospongiae	Bubarida	Bubaridae	Bubaris	Bubaris subtyla	Pulitzer-Finali, 1983	Bubaris subtyla Pulitzer-Finali, 1983
61	MIB	Ionian Sea	Santa Maria di Leuca	39.73114575	18.347193	Porifera	Demospongiae	Bubarida	Bubaridae	Bubaris	Bubaris vermiculata	(Bowerbank, 1866)	Bubaris vermiculata (Bowerbank, 1866)
61	MIB	Adriatic Sea	Monopoli	40.98221667	17.28620278	Porifera	Demospongiae	Bubarida	Bubaridae	Bubaris	Bubaris vermiculata	(Bowerbank, 1866)	Bubaris vermiculata (Bowerbank, 1866)
61	MIB	Adriatic Sea	Capitolo	40.94719344	17.449318	Porifera	Demospongiae	Bubarida	Bubaridae	Bubaris	Bubaris vermiculata	(Bowerbank, 1866)	Bubaris vermiculata (Bowerbank, 1866)
61	MIB	Adriatic Sea	San Foca	40.3241782	18.4662928	Porifera	Demospongiae	Bubarida	Bubaridae	Bubaris	Bubaris vermiculata	(Bowerbank, 1866)	Bubaris vermiculata (Bowerbank, 1866)
61	MAB	Adriatic Sea	Otranto	40.12885900	18.520781	Porifera	Demospongiae	Bubarida	Bubaridae	Bubaris	Bubaris vermiculata	(Bowerbank, 1866)	Bubaris vermiculata (Bowerbank, 1866)
61	MAB	Ionian Sea	Santa Maria di Leuca	39.73114575	18.347193	Porifera	Demospongiae	Bubarida	Bubaridae	Bubaris	Bubaris vermiculata	(Bowerbank, 1866)	Bubaris vermiculata (Bowerbank, 1866)
61	MAB	Adriatic Sea	Monopoli	40.98221667	17.28620278	Porifera	Demospongiae	Bubarida	Bubaridae	Bubaris	Bubaris vermiculata	(Bowerbank, 1866)	Bubaris vermiculata (Bowerbank, 1866)
61	MAB	Adriatic Sea	Capitolo	40.94719344	17.449318	Porifera	Demospongiae	Bubarida	Bubaridae	Bubaris	Bubaris vermiculata	(Bowerbank, 1866)	Bubaris vermiculata (Bowerbank, 1866)
61	MAB	Adriatic Sea	Tremiti	42.1382530	15.52244	Porifera	Demospongiae	Bubarida	Bubaridae	Bubaris	Bubaris vermiculata	(Bowerbank, 1866)	Bubaris vermiculata (Bowerbank, 1866)
62	MAB	Adriatic Sea	Monopoli	40.98221667	17.28620278	Porifera	Demospongiae	Bubarida	Bubaridae	Monocrepidium	Monocrepidium vermiculatum	Topsent, 1898	Monocrepidium vermiculatum Topsent, 1898
63		Adriatic Sea	unaccepted name			Porifera	Demospongiae	Bubarida	Bubaridae	Phakellia	Phakellia rugosa	(Bowerbank, 1866)	Phakellia rugosa (Bowerbank, 1866)
64	MIB	Adriatic Sea	Capitolo	40.94719344	17.449318	Porifera	Demospongiae	Bubarida	Bubaridae	Rhabdobaris	Rhabdobaris	Pulitzer-Finali, 1983	Rhabdobaris Pulitzer-Finali, 1983
65	MIB	Adriatic Sea	Otranto	40.1288590	18.520781	Porifera	Demospongiae	Bubarida	Dictyonellidae	Acanthella	Acanthella acuta	Schmidt, 1862	Acanthella acuta Schmidt, 1862
65	MIB	Ionian Sea	Santa Maria di Leuca	39.73114575	18.347193	Porifera	Demospongiae	Bubarida	Dictyonellidae	Acanthella	Acanthella acuta	Schmidt, 1862	Acanthella acuta Schmidt, 1862
65	MIB	Adriatic Sea	Monopoli	40.98221667	17.28620278	Porifera	Demospongiae	Bubarida	Dictyonellidae	Acanthella	Acanthella acuta	Schmidt, 1862	Acanthella acuta Schmidt, 1862
65	MIB	Adriatic Sea	Capitolo	40.94719344	17.449318	Porifera	Demospongiae	Bubarida	Dictyonellidae	Acanthella	Acanthella acuta	Schmidt, 1862	Acanthella acuta Schmidt, 1862
65	MIB	Adriatic Sea	Tremiti	42.13825300	15.522442	Porifera	Demospongiae	Bubarida	Dictyonellidae	Acanthella	Acanthella acuta	Schmidt, 1862	Acanthella acuta Schmidt, 1862
65	MIB	Adriatic Sea	San Foca	40.3241782	18.4662928	Porifera	Demospongiae	Bubarida	Dictyonellidae	Acanthella	Acanthella acuta	Schmidt, 1862	Acanthella acuta Schmidt, 1862
65	MAB	Adriatic Sea	Otranto	40.12885900	18.520781	Porifera	Demospongiae	Bubarida	Dictyonellidae	Acanthella	Acanthella acuta	Schmidt, 1862	Acanthella acuta Schmidt, 1862
65	MAB	Ionian Sea	Santa Maria di Leuca	39.73114575	18.347193	Porifera	Demospongiae	Bubarida	Dictyonellidae	Acanthella	Acanthella acuta	Schmidt, 1862	Acanthella acuta Schmidt, 1862
65	MAB	Adriatic Sea	Monopoli	40.98221667	17.28620278	Porifera	Demospongiae	Bubarida	Dictyonellidae	Acanthella	Acanthella acuta	Schmidt, 1862	Acanthella acuta Schmidt, 1862
65	MAB	Adriatic Sea	San Foca	40.32417820	18.46629286	Porifera	Demospongiae	Bubarida	Dictyonellidae	Acanthella	Acanthella acuta	Schmidt, 1862	Acanthella acuta Schmidt, 1862
66	MIB	Adriatic Sea	Otranto	40.1288590	18.520781	Porifera	Demospongiae	Bubarida	Dictyonellidae	Dictyonella	Dictyonella incisa	(Schmidt, 1880)	Dictyonella incisa (Schmidt, 1880)
66	MIB	Adriatic Sea	San Foca	40.3241782	18.4662928	Porifera	Demospongiae	Bubarida	Dictyonellidae	Dictyonella	Dictyonella incisa	(Schmidt, 1880)	Dictyonella incisa (Schmidt, 1880)
66	MAB	Adriatic Sea	Otranto	40.12885900	18.520781	Porifera	Demospongiae	Bubarida	Dictyonellidae	Dictyonella	Dictyonella incisa	(Schmidt, 1880)	Dictyonella incisa (Schmidt, 1880)
66	MAB	Adriatic Sea	Capitolo	40.94719344	17.449318	Porifera	Demospongiae	Bubarida	Dictyonellidae	Dictyonella	Dictyonella incisa	(Schmidt, 1880)	Dictyonella incisa (Schmidt, 1880)
66	MAB	Adriatic Sea	Tremiti	42.1382530	15.52244	Porifera	Demospongiae	Bubarida	Dictyonellidae	Dictyonella	Dictyonella incisa	(Schmidt, 1880)	Dictyonella incisa (Schmidt, 1880)
67	MAB	Adriatic Sea	Otranto	40.12885900	18.520781	Porifera	Demospongiae	Bubarida	Dictyonellidae	Dictyonella	Dictyonella marsilii	Topsent, 1893	Dictyonella marsilii Topsent, 1893
67	MAB	Adriatic Sea	Capitolo	40.94719344	17.449318	Porifera	Demospongiae	Bubarida	Dictyonellidae	Dictyonella	Dictyonella marsilii	Topsent, 1893	Dictyonella marsilii Topsent, 1893
67	MAB	Adriatic Sea	Tremiti	42.1382530	15.52244	Porifera	Demospongiae	Bubarida	Dictyonellidae	Dictyonella	Dictyonella marsilii	Topsent, 1893	Dictyonella marsilii Topsent, 1893
67	MAB	Adriatic Sea	San Foca	40.32417820	18.46629286	Porifera	Demospongiae	Bubarida	Dictyonellidae	Dictyonella	Dictyonella marsilii	Topsent, 1893	Dictyonella marsilii Topsent, 1893
68	MAB	Adriatic Sea	Otranto	40.12885900	18.520781	Porifera	Demospongiae	Chondrillida	Chondrillidae	Chondrilla	Chondrilla nucula	Schmidt, 1862	Chondrilla nucula Schmidt, 1862
68	MAB	Ionian Sea	Santa Maria di Leuca	39.73114575	18.347193	Porifera	Demospongiae	Chondrillida	Chondrillidae	Chondrilla	Chondrilla nucula	Schmidt, 1862	Chondrilla nucula Schmidt, 1862
69	MIB	Adriatic Sea	Otranto	40.1288590	18.520781	Porifera	Demospongiae	Chondrosiida	Chondrosiidae	Chondrosia	Chondrosia reniformis	Nardo, 1847	Chondrosia reniformis Nardo, 1847
69	MIB	Ionian Sea	Santa Maria di Leuca	39.73114575	18.347193	Porifera	Demospongiae	Chondrosiida	Chondrosiidae	Chondrosia	Chondrosia reniformis	Nardo, 1847	Chondrosia reniformis Nardo, 1847
69	MIB	Adriatic Sea	Monopoli	40.98221667	17.28620278	Porifera	Demospongiae	Chondrosiida	Chondrosiidae	Chondrosia	Chondrosia reniformis	Nardo, 1847	Chondrosia reniformis Nardo, 1847
69	MIB	Adriatic Sea	Tremiti	42.13825300	15.522442	Porifera	Demospongiae	Chondrosiida	Chondrosiidae	Chondrosia	Chondrosia reniformis	Nardo, 1847	Chondrosia reniformis Nardo, 1847
69	MIB	Adriatic Sea	San Foca	40.3241782	18.4662928	Porifera	Demospongiae	Chondrosiida	Chondrosiidae	Chondrosia	Chondrosia reniformis	Nardo, 1847	Chondrosia reniformis Nardo, 1847
69	MAB	Adriatic Sea	Otranto	40.12885900	18.520781	Porifera	Demospongiae	Chondrosiida	Chondrosiidae	Chondrosia	Chondrosia reniformis	Nardo, 1847	Chondrosia reniformis Nardo, 1847
69	MAB	Ionian Sea	Santa Maria di Leuca	39.73114575	18.347193	Porifera	Demospongiae	Chondrosiida	Chondrosiidae	Chondrosia	Chondrosia reniformis	Nardo, 1847	Chondrosia reniformis Nardo, 1847
69	MAB	Adriatic Sea	Monopoli	40.98221667	17.28620278	Porifera	Demospongiae	Chondrosiida	Chondrosiidae	Chondrosia	Chondrosia reniformis	Nardo, 1847	Chondrosia reniformis Nardo, 1847
69	MAB	Adriatic Sea	San Foca	40.32417820	18.46629286	Porifera	Demospongiae	Chondrosiida	Chondrosiidae	Chondrosia	Chondrosia reniformis	Nardo, 1847	Chondrosia reniformis Nardo, 1847
70	MIB	Adriatic Sea	San Foca	40.3241782	18.4662928	Porifera	Demospongiae	Clionaida	Clionaidae	Cliona	Cliona celata	Grant, 1826	Cliona celata Grant, 1826
70	MAB	Adriatic Sea	Otranto	40.12885900	18.520781	Porifera	Demospongiae	Clionaida	Clionaidae	Cliona	Cliona celata	Grant, 1826	Cliona celata Grant, 1826
70	MAB	Adriatic Sea	Monopoli	40.98221667	17.28620278	Porifera	Demospongiae	Clionaida	Clionaidae	Cliona	Cliona celata	Grant, 1826	Cliona celata Grant, 1826
71	MIB	Adriatic Sea	Otranto	40.1288590	18.520781	Porifera	Demospongiae	Clionaida	Clionaidae	Cliona	Cliona janitrix	Topsent, 1932	Cliona janitrix Topsent, 1932
71	MIB	Ionian Sea	Santa Maria di Leuca	39.73114575	18.347193	Porifera	Demospongiae	Clionaida	Clionaidae	Cliona	Cliona janitrix	Topsent, 1932	Cliona janitrix Topsent, 1932
71	MIB	Adriatic Sea	Monopoli	40.98221667	17.28620278	Porifera	Demospongiae	Clionaida	Clionaidae	Cliona	Cliona janitrix	Topsent, 1932	Cliona janitrix Topsent, 1932
72	MAB	Adriatic Sea	Otranto	40.12885900	18.520781	Porifera	Demospongiae	Clionaida	Clionaidae	Cliona	Cliona nigricans	Schmidt, 1862	Cliona nigricans sensu Schmidt, 1862
72	MAB	Adriatic Sea	Capitolo	40.94719344	17.449318	Porifera	Demospongiae	Clionaida	Clionaidae	Cliona	Cliona nigricans	Schmidt, 1862	Cliona nigricans sensu Schmidt, 1862
73	MAB	Adriatic Sea	Otranto	40.12885900	18.520781	Porifera	Demospongiae	Clionaida	Clionaidae	Cliona	Cliona rhodensis	Rutler & Bromley, 1981	Cliona rhodensis Rutler & Bromley, 1981
74	MIB	Adriatic Sea	Monopoli	40.98221667	17.28620278	Porifera	Demospongiae	Clionaida	Clionaidae	Cliona	Cliona schmidtii	(Ridley, 1881)	Cliona schmidti (Ridley, 1881)
74	MIB	Adriatic Sea	San Foca	40.3241782	18.4662928	Porifera	Demospongiae	Clionaida	Clionaidae	Cliona	Cliona schmidtii	(Ridley, 1881)	Cliona schmidti (Ridley, 1881)
74	MAB	Adriatic Sea	Otranto	40.12885900	18.520781	Porifera	Demospongiae	Clionaida	Clionaidae	Cliona	Cliona schmidtii	(Ridley, 1881)	Cliona schmidti (Ridley, 1881)
74	MAB	Ionian Sea	Santa Maria di Leuca	39.73114575	18.347193	Porifera	Demospongiae	Clionaida	Clionaidae	Cliona	Cliona schmidtii	(Ridley, 1881)	Cliona schmidti (Ridley, 1881)
74	MAB	Adriatic Sea	Monopoli	40.98221667	17.28620278	Porifera	Demospongiae	Clionaida	Clionaidae	Cliona	Cliona schmidtii	(Ridley, 1881)	Cliona schmidti (Ridley, 1881)
74	MAB	Adriatic Sea	San Foca	40.32417820	18.46629286	Porifera	Demospongiae	Clionaida	Clionaidae	Cliona	Cliona schmidtii	(Ridley, 1881)	Cliona schmidti (Ridley, 1881)
75	MAB	Adriatic Sea	Tremiti	42.1382530	15.52244	Porifera	Demospongiae	Clionaida	Clionaidae	Cliona	Cliona vermifera	Hancock, 1867	Cliona vermifera Hancock, 1867
76	MIB	Ionian Sea	Santa Maria di Leuca	39.73114575	18.347193	Porifera	Demospongiae	Clionaida	Clionaidae	Cliona	Cliona viridis	(Schmidt, 1862)	Cliona viridis (Schmidt, 1862)
76	MAB	Adriatic Sea	Otranto	40.12885900	18.520781	Porifera	Demospongiae	Clionaida	Clionaidae	Cliona	Cliona viridis	(Schmidt, 1862)	Cliona viridis (Schmidt, 1862)
76	MAB	Ionian Sea	Santa Maria di Leuca	39.73114575	18.347193	Porifera	Demospongiae	Clionaida	Clionaidae	Cliona	Cliona viridis	(Schmidt, 1862)	Cliona viridis (Schmidt, 1862)
76	MAB	Adriatic Sea	Monopoli	40.98221667	17.28620278	Porifera	Demospongiae	Clionaida	Clionaidae	Cliona	Cliona viridis	(Schmidt, 1862)	Cliona viridis (Schmidt, 1862)
76	MAB	Adriatic Sea	Capitolo	40.94719344	17.449318	Porifera	Demospongiae	Clionaida	Clionaidae	Cliona	Cliona viridis	(Schmidt, 1862)	Cliona viridis (Schmidt, 1862)
76	MAB	Adriatic Sea	Tremiti	42.1382530	15.52244	Porifera	Demospongiae	Clionaida	Clionaidae	Cliona	Cliona viridis	(Schmidt, 1862)	Cliona viridis (Schmidt, 1862)
77	MIB	Adriatic Sea	Tremiti	42.13825300	15.522442	Porifera	Demospongiae	Clionaida	Clionaidae	Cliona	Cliona	Grant, 1826	Cliona Grant, 1826
77	MAB	Adriatic Sea	Otranto	40.12885900	18.520781	Porifera	Demospongiae	Clionaida	Clionaidae	Cliona	Cliona	Grant, 1826	Cliona Grant, 1826
77	MAB	Adriatic Sea	Monopoli	40.98221667	17.28620278	Porifera	Demospongiae	Clionaida	Clionaidae	Cliona	Cliona	Grant, 1826	Cliona Grant, 1826
77	MAB	Adriatic Sea	Tremiti	42.1382530	15.52244	Porifera	Demospongiae	Clionaida	Clionaidae	Cliona	Cliona	Grant, 1826	Cliona Grant, 1826
78	MIB	Adriatic Sea	Monopoli	40.98221667	17.28620278	Porifera	Demospongiae	Clionaida	Clionaidae	Pione	Pione vastifica	(Hancock, 1849)	Pione vastifica (Hancock, 1849)
79	MAB	Adriatic Sea	Capitolo	40.94719344	17.449318	Porifera	Demospongiae	Clionaida	Clionaidae	Pione	Pione	Gray, 1867	Pione Gray, 1867
80	MIB	Ionian Sea	Santa Maria di Leuca	39.73114575	18.347193	Porifera	Demospongiae	Clionaida	Clionaidae	Spiroxya	Spiroxya heteroclita	Topsent, 1896	Spiroxya heteroclita Topsent, 1896
81	MAB	Adriatic Sea	Tremiti	42.1382530	15.52244	Porifera	Demospongiae	Clionaida	Clionaidae	Spiroxya	Spiroxya levispira	(Topsent, 1898)	Spiroxya levispira (Topsent, 1898)
82	MIB	Ionian Sea	Santa Maria di Leuca	39.73114575	18.347193	Porifera	Demospongiae	Clionaida	Clionaidae	Spiroxya	Spiroxya sarai	(Melone, 1965)	Spiroxya sarai (Melone, 1965)
82	MIB	Adriatic Sea	Capitolo	40.94719344	17.449318	Porifera	Demospongiae	Clionaida	Clionaidae	Spiroxya	Spiroxya sarai	(Melone, 1965)	Spiroxya sarai (Melone, 1965)
83	MIB	Ionian Sea	Santa Maria di Leuca	39.73114575	18.347193	Porifera	Demospongiae	Clionaida	Spirastrellidae	Diplastrella	Diplastrella bistellata	(Schmidt, 1862)	Diplastrella bistellata (Schmidt, 1862)
83	MIB	Adriatic Sea	Capitolo	40.94719344	17.449318	Porifera	Demospongiae	Clionaida	Spirastrellidae	Diplastrella	Diplastrella bistellata	(Schmidt, 1862)	Diplastrella bistellata (Schmidt, 1862)
83	MAB	Adriatic Sea	Otranto	40.12885900	18.520781	Porifera	Demospongiae	Clionaida	Spirastrellidae	Diplastrella	Diplastrella bistellata	(Schmidt, 1862)	Diplastrella bistellata (Schmidt, 1862)
83	MAB	Ionian Sea	Santa Maria di Leuca	39.73114575	18.347193	Porifera	Demospongiae	Clionaida	Spirastrellidae	Diplastrella	Diplastrella bistellata	(Schmidt, 1862)	Diplastrella bistellata (Schmidt, 1862)
83	MAB	Adriatic Sea	Monopoli	40.98221667	17.28620278	Porifera	Demospongiae	Clionaida	Spirastrellidae	Diplastrella	Diplastrella bistellata	(Schmidt, 1862)	Diplastrella bistellata (Schmidt, 1862)
83	MAB	Adriatic Sea	Capitolo	40.94719344	17.449318	Porifera	Demospongiae	Clionaida	Spirastrellidae	Diplastrella	Diplastrella bistellata	(Schmidt, 1862)	Diplastrella bistellata (Schmidt, 1862)
83	MAB	Adriatic Sea	Tremiti	42.1382530	15.52244	Porifera	Demospongiae	Clionaida	Spirastrellidae	Diplastrella	Diplastrella bistellata	(Schmidt, 1862)	Diplastrella bistellata (Schmidt, 1862)
84	MAB	Adriatic Sea	Monopoli	40.98221667	17.28620278	Porifera	Demospongiae	Clionaida	Spirastrellidae	Diplastrella	Diplastrella ornata	Rützler & Sarà, 1962	Diplastrella ornata Rützler & Sarà, 1962
85	MIB	Adriatic Sea	Monopoli	40.98221667	17.28620278	Porifera	Demospongiae	Clionaida	Spirastrellidae	Spirastrella	Spirastrella cunctatrix	Schmidt, 1868	Spirastrella cunctatrix Schmidt, 1868
85	MAB	Adriatic Sea	Otranto	40.12885900	18.520781	Porifera	Demospongiae	Clionaida	Spirastrellidae	Spirastrella	Spirastrella cunctatrix	Schmidt, 1868	Spirastrella cunctatrix Schmidt, 1868
85	MAB	Ionian Sea	Santa Maria di Leuca	39.73114575	18.347193	Porifera	Demospongiae	Clionaida	Spirastrellidae	Spirastrella	Spirastrella cunctatrix	Schmidt, 1868	Spirastrella cunctatrix Schmidt, 1868
85	MAB	Adriatic Sea	Monopoli	40.98221667	17.28620278	Porifera	Demospongiae	Clionaida	Spirastrellidae	Spirastrella	Spirastrella cunctatrix	Schmidt, 1868	Spirastrella cunctatrix Schmidt, 1868
85	MAB	Adriatic Sea	Capitolo	40.94719344	17.449318	Porifera	Demospongiae	Clionaida	Spirastrellidae	Spirastrella	Spirastrella cunctatrix	Schmidt, 1868	Spirastrella cunctatrix Schmidt, 1868
85	MAB	Adriatic Sea	San Foca	40.32417820	18.46629286	Porifera	Demospongiae	Clionaida	Spirastrellidae	Spirastrella	Spirastrella cunctatrix	Schmidt, 1868	Spirastrella cunctatrix Schmidt, 1868
86	MAB	Adriatic Sea	Otranto	40.12885900	18.520781	Porifera	Demospongiae	Clionaida	Spirastrellidae		Spirastrellidae		Spirastrellidae
86	MAB	Ionian Sea	Santa Maria di Leuca	39.73114575	18.347193	Porifera	Demospongiae	Clionaida	Spirastrellidae		Spirastrellidae		Spirastrellidae
87	MIB	Adriatic Sea	Capitolo	40.94719344	17.449318	Porifera	Demospongiae	Dendroceratida	Darwinellidae	Aplysilla	Aplysilla rosea	(Barrois, 1876)	Aplysilla rosea (Barrois, 1876)
88	MIB	Adriatic Sea	Monopoli	40.98221667	17.28620278	Porifera	Demospongiae	Dendroceratida	Dictyodendrillidae	Spongionella	Spongionella depressa	Topsent, 1929	Spongionella depressa Topsent, 1929
89	MIB	Adriatic Sea	Otranto	40.1288590	18.520781	Porifera	Demospongiae	Dendroceratida	Dictyodendrillidae	Spongionella	Spongionella gracilis	(Vosmaer, 1883)	Spongionella gracilis (Vosmaer, 1883)
90	MIB	Adriatic Sea	Capitolo	40.94719344	17.449318	Porifera	Demospongiae	Desmacellida	Desmacellidae	Desmacella	Desmacella vagabunda	Schmidt, 1870	Desmacella vagabunda Schmidt, 1870
90	MIB	Adriatic Sea	Tremiti	42.13825300	15.522442	Porifera	Demospongiae	Desmacellida	Desmacellidae	Desmacella	Desmacella vagabunda	Schmidt, 1870	Desmacella vagabunda Schmidt, 1870
90	MAB	Adriatic Sea	Capitolo	40.94719344	17.449318	Porifera	Demospongiae	Desmacellida	Desmacellidae	Desmacella	Desmacella vagabunda	Schmidt, 1870	Desmacella vagabunda Schmidt, 1870
91	MIB	Adriatic Sea	Otranto	40.1288590	18.520781	Porifera	Demospongiae	Dictyoceratida	Dysideidae	Dysidea	Dysidea avara	(Schmidt, 1862)	Dysidea avara (Schmidt, 1862)
91	MIB	Ionian Sea	Santa Maria di Leuca	39.73114575	18.347193	Porifera	Demospongiae	Dictyoceratida	Dysideidae	Dysidea	Dysidea avara	(Schmidt, 1862)	Dysidea avara (Schmidt, 1862)
91	MIB	Adriatic Sea	Tremiti	42.13825300	15.522442	Porifera	Demospongiae	Dictyoceratida	Dysideidae	Dysidea	Dysidea avara	(Schmidt, 1862)	Dysidea avara (Schmidt, 1862)
91	MIB	Adriatic Sea	San Foca	40.3241782	18.4662928	Porifera	Demospongiae	Dictyoceratida	Dysideidae	Dysidea	Dysidea avara	(Schmidt, 1862)	Dysidea avara (Schmidt, 1862)
91	MAB	Adriatic Sea	Otranto	40.12885900	18.520781	Porifera	Demospongiae	Dictyoceratida	Dysideidae	Dysidea	Dysidea avara	(Schmidt, 1862)	Dysidea avara (Schmidt, 1862)
91	MAB	Ionian Sea	Santa Maria di Leuca	39.73114575	18.347193	Porifera	Demospongiae	Dictyoceratida	Dysideidae	Dysidea	Dysidea avara	(Schmidt, 1862)	Dysidea avara (Schmidt, 1862)
91	MAB	Adriatic Sea	Monopoli	40.98221667	17.28620278	Porifera	Demospongiae	Dictyoceratida	Dysideidae	Dysidea	Dysidea avara	(Schmidt, 1862)	Dysidea avara (Schmidt, 1862)
92	MIB	Ionian Sea	Santa Maria di Leuca	39.73114575	18.347193	Porifera	Demospongiae	Dictyoceratida	Dysideidae	Dysidea	Dysidea fragilis	(Montagu, 1814)	Dysidea fragilis (Montagu, 1814)
92	MIB	Adriatic Sea	Monopoli	40.98221667	17.28620278	Porifera	Demospongiae	Dictyoceratida	Dysideidae	Dysidea	Dysidea fragilis	(Montagu, 1814)	Dysidea fragilis (Montagu, 1814)
92	MIB	Adriatic Sea	Tremiti	42.13825300	15.522442	Porifera	Demospongiae	Dictyoceratida	Dysideidae	Dysidea	Dysidea fragilis	(Montagu, 1814)	Dysidea fragilis (Montagu, 1814)
92	MAB	Adriatic Sea	Otranto	40.12885900	18.520781	Porifera	Demospongiae	Dictyoceratida	Dysideidae	Dysidea	Dysidea fragilis	(Montagu, 1814)	Dysidea fragilis (Montagu, 1814)
93	MIB	Adriatic Sea	Tremiti	42.13825300	15.522442	Porifera	Demospongiae	Dictyoceratida	Dysideidae	Dysidea	Dysidea incrustans	(Schmidt, 1862)	Dysidea incrustans (Schmidt, 1862)
94	MAB	Adriatic Sea	San Foca	40.32417820	18.46629286	Porifera	Demospongiae	Dictyoceratida	Dysideidae	Dysidea	Dysidea tupha	(Pallas, 1766)	Dysidea tupha (Pallas, 1766)
95	MIB	Adriatic Sea	Otranto	40.1288590	18.520781	Porifera	Demospongiae	Dictyoceratida	Dysideidae	Dysidea	Dysidea	Johnston, 1842	Dysidea Johnston, 1842
95	MIB	Ionian Sea	Santa Maria di Leuca	39.73114575	18.347193	Porifera	Demospongiae	Dictyoceratida	Dysideidae	Dysidea	Dysidea	Johnston, 1842	Dysidea Johnston, 1842
95	MIB	Adriatic Sea	Monopoli	40.98221667	17.28620278	Porifera	Demospongiae	Dictyoceratida	Dysideidae	Dysidea	Dysidea	Johnston, 1842	Dysidea Johnston, 1842
95	MIB	Adriatic Sea	Capitolo	40.94719344	17.449318	Porifera	Demospongiae	Dictyoceratida	Dysideidae	Dysidea	Dysidea	Johnston, 1842	Dysidea Johnston, 1842
95	MIB	Adriatic Sea	Tremiti	42.13825300	15.522442	Porifera	Demospongiae	Dictyoceratida	Dysideidae	Dysidea	Dysidea	Johnston, 1842	Dysidea Johnston, 1842
95	MIB	Adriatic Sea	San Foca	40.3241782	18.4662928	Porifera	Demospongiae	Dictyoceratida	Dysideidae	Dysidea	Dysidea	Johnston, 1842	Dysidea Johnston, 1842
95	MAB	Adriatic Sea	Otranto	40.12885900	18.520781	Porifera	Demospongiae	Dictyoceratida	Dysideidae	Dysidea	Dysidea	Johnston, 1842	Dysidea Johnston, 1842
95	MAB	Ionian Sea	Santa Maria di Leuca	39.73114575	18.347193	Porifera	Demospongiae	Dictyoceratida	Dysideidae	Dysidea	Dysidea	Johnston, 1842	Dysidea Johnston, 1842
95	MAB	Adriatic Sea	Monopoli	40.98221667	17.28620278	Porifera	Demospongiae	Dictyoceratida	Dysideidae	Dysidea	Dysidea	Johnston, 1842	Dysidea Johnston, 1842
96	MIB	Adriatic Sea	Otranto	40.1288590	18.520781	Porifera	Demospongiae	Dictyoceratida	Dysideidae	Pleraplysilla	Pleraplysilla spinifera	(Schulze, 1879)	Pleraplysilla spinifera (Schulze, 1879)
96	MIB	Ionian Sea	Santa Maria di Leuca	39.73114575	18.347193	Porifera	Demospongiae	Dictyoceratida	Dysideidae	Pleraplysilla	Pleraplysilla spinifera	(Schulze, 1879)	Pleraplysilla spinifera (Schulze, 1879)
96	MIB	Adriatic Sea	Monopoli	40.98221667	17.28620278	Porifera	Demospongiae	Dictyoceratida	Dysideidae	Pleraplysilla	Pleraplysilla spinifera	(Schulze, 1879)	Pleraplysilla spinifera (Schulze, 1879)
96	MIB	Adriatic Sea	Tremiti	42.13825300	15.522442	Porifera	Demospongiae	Dictyoceratida	Dysideidae	Pleraplysilla	Pleraplysilla spinifera	(Schulze, 1879)	Pleraplysilla spinifera (Schulze, 1879)
96	MIB	Adriatic Sea	San Foca	40.3241782	18.4662928	Porifera	Demospongiae	Dictyoceratida	Dysideidae	Pleraplysilla	Pleraplysilla spinifera	(Schulze, 1879)	Pleraplysilla spinifera (Schulze, 1879)
97	MIB	Adriatic Sea	Otranto	40.1288590	18.520781	Porifera	Demospongiae	Dictyoceratida	Irciniidae	Ircinia	Ircinia dendroides	(Schmidt, 1862)	Ircinia dendroides (Schmidt, 1862)
98	MIB	Ionian Sea	Santa Maria di Leuca	39.73114575	18.347193	Porifera	Demospongiae	Dictyoceratida	Irciniidae	Ircinia	Ircinia oros	(Schmidt, 1864)	Ircinia oros (Schmidt, 1864)
98	MIB	Adriatic Sea	Monopoli	40.98221667	17.28620278	Porifera	Demospongiae	Dictyoceratida	Irciniidae	Ircinia	Ircinia oros	(Schmidt, 1864)	Ircinia oros (Schmidt, 1864)
98	MAB	Ionian Sea	Santa Maria di Leuca	39.73114575	18.347193	Porifera	Demospongiae	Dictyoceratida	Irciniidae	Ircinia	Ircinia oros	(Schmidt, 1864)	Ircinia oros (Schmidt, 1864)
98	MAB	Adriatic Sea	San Foca	40.32417820	18.46629286	Porifera	Demospongiae	Dictyoceratida	Irciniidae	Ircinia	Ircinia oros	(Schmidt, 1864)	Ircinia oros (Schmidt, 1864)
99	MIB	Ionian Sea	Santa Maria di Leuca	39.73114575	18.347193	Porifera	Demospongiae	Dictyoceratida	Irciniidae	Ircinia	Ircinia variabilis	(Schmidt, 1862)	Ircinia variabilis (Schmidt, 1862)
99	MIB	Adriatic Sea	San Foca	40.3241782	18.4662928	Porifera	Demospongiae	Dictyoceratida	Irciniidae	Ircinia	Ircinia variabilis	(Schmidt, 1862)	Ircinia variabilis (Schmidt, 1862)
99	MAB	Adriatic Sea	San Foca	40.32417820	18.46629286	Porifera	Demospongiae	Dictyoceratida	Irciniidae	Ircinia	Ircinia variabilis	(Schmidt, 1862)	Ircinia variabilis (Schmidt, 1862)
100	MIB	Adriatic Sea	Otranto	40.1288590	18.520781	Porifera	Demospongiae	Dictyoceratida	Irciniidae	Ircinia	Ircinia	Nardo, 1833	Ircinia Nardo, 1833
100	MIB	Ionian Sea	Santa Maria di Leuca	39.73114575	18.347193	Porifera	Demospongiae	Dictyoceratida	Irciniidae	Ircinia	Ircinia	Nardo, 1833	Ircinia Nardo, 1833
100	MIB	Adriatic Sea	Monopoli	40.98221667	17.28620278	Porifera	Demospongiae	Dictyoceratida	Irciniidae	Ircinia	Ircinia	Nardo, 1833	Ircinia Nardo, 1833
100	MAB	Adriatic Sea	Otranto	40.12885900	18.520781	Porifera	Demospongiae	Dictyoceratida	Irciniidae	Ircinia	Ircinia	Nardo, 1833	Ircinia Nardo, 1833
100	MAB	Ionian Sea	Santa Maria di Leuca	39.73114575	18.347193	Porifera	Demospongiae	Dictyoceratida	Irciniidae	Ircinia	Ircinia	Nardo, 1833	Ircinia Nardo, 1833
100	MAB	Adriatic Sea	Monopoli	40.98221667	17.28620278	Porifera	Demospongiae	Dictyoceratida	Irciniidae	Ircinia	Ircinia	Nardo, 1833	Ircinia Nardo, 1833
100	MAB	Adriatic Sea	San Foca	40.32417820	18.46629286	Porifera	Demospongiae	Dictyoceratida	Irciniidae	Ircinia	Ircinia	Nardo, 1833	Ircinia Nardo, 1833
101	MIB	Adriatic Sea	Otranto	40.1288590	18.520781	Porifera	Demospongiae	Dictyoceratida	Irciniidae	Sarcotragus	Sarcotragus foetidus	Schmidt, 1862	Sarcotragus foetidus Schmidt, 1862
101	MIB	Ionian Sea	Santa Maria di Leuca	39.73114575	18.347193	Porifera	Demospongiae	Dictyoceratida	Irciniidae	Sarcotragus	Sarcotragus foetidus	Schmidt, 1862	Sarcotragus foetidus Schmidt, 1862
101	MIB	Adriatic Sea	Monopoli	40.98221667	17.28620278	Porifera	Demospongiae	Dictyoceratida	Irciniidae	Sarcotragus	Sarcotragus foetidus	Schmidt, 1862	Sarcotragus foetidus Schmidt, 1862
101	MIB	Adriatic Sea	Tremiti	42.13825300	15.522442	Porifera	Demospongiae	Dictyoceratida	Irciniidae	Sarcotragus	Sarcotragus foetidus	Schmidt, 1862	Sarcotragus foetidus Schmidt, 1862
101	MIB	Adriatic Sea	San Foca	40.3241782	18.4662928	Porifera	Demospongiae	Dictyoceratida	Irciniidae	Sarcotragus	Sarcotragus foetidus	Schmidt, 1862	Sarcotragus foetidus Schmidt, 1862
101	MAB	Adriatic Sea	Otranto	40.12885900	18.520781	Porifera	Demospongiae	Dictyoceratida	Irciniidae	Sarcotragus	Sarcotragus foetidus	Schmidt, 1862	Sarcotragus foetidus Schmidt, 1862
101	MAB	Ionian Sea	Santa Maria di Leuca	39.73114575	18.347193	Porifera	Demospongiae	Dictyoceratida	Irciniidae	Sarcotragus	Sarcotragus foetidus	Schmidt, 1862	Sarcotragus foetidus Schmidt, 1862
101	MAB	Adriatic Sea	Monopoli	40.98221667	17.28620278	Porifera	Demospongiae	Dictyoceratida	Irciniidae	Sarcotragus	Sarcotragus foetidus	Schmidt, 1862	Sarcotragus foetidus Schmidt, 1862
101	MAB	Adriatic Sea	San Foca	40.32417820	18.46629286	Porifera	Demospongiae	Dictyoceratida	Irciniidae	Sarcotragus	Sarcotragus foetidus	Schmidt, 1862	Sarcotragus foetidus Schmidt, 1862
102	MIB	Adriatic Sea	Otranto	40.1288590	18.520781	Porifera	Demospongiae	Dictyoceratida	Irciniidae	Sarcotragus	Sarcotragus spinosulus	Schmidt, 1862	Sarcotragus spinosulus Schmidt, 1862
102	MIB	Ionian Sea	Santa Maria di Leuca	39.73114575	18.347193	Porifera	Demospongiae	Dictyoceratida	Irciniidae	Sarcotragus	Sarcotragus spinosulus	Schmidt, 1862	Sarcotragus spinosulus Schmidt, 1862
102	MIB	Adriatic Sea	Monopoli	40.98221667	17.28620278	Porifera	Demospongiae	Dictyoceratida	Irciniidae	Sarcotragus	Sarcotragus spinosulus	Schmidt, 1862	Sarcotragus spinosulus Schmidt, 1862
102	MIB	Adriatic Sea	Tremiti	42.13825300	15.522442	Porifera	Demospongiae	Dictyoceratida	Irciniidae	Sarcotragus	Sarcotragus spinosulus	Schmidt, 1862	Sarcotragus spinosulus Schmidt, 1862
102	MAB	Adriatic Sea	Otranto	40.12885900	18.520781	Porifera	Demospongiae	Dictyoceratida	Irciniidae	Sarcotragus	Sarcotragus spinosulus	Schmidt, 1862	Sarcotragus spinosulus Schmidt, 1862
102	MAB	Ionian Sea	Santa Maria di Leuca	39.73114575	18.347193	Porifera	Demospongiae	Dictyoceratida	Irciniidae	Sarcotragus	Sarcotragus spinosulus	Schmidt, 1862	Sarcotragus spinosulus Schmidt, 1862
102	MAB	Adriatic Sea	Monopoli	40.98221667	17.28620278	Porifera	Demospongiae	Dictyoceratida	Irciniidae	Sarcotragus	Sarcotragus spinosulus	Schmidt, 1862	Sarcotragus spinosulus Schmidt, 1862
102	MAB	Adriatic Sea	San Foca	40.32417820	18.46629286	Porifera	Demospongiae	Dictyoceratida	Irciniidae	Sarcotragus	Sarcotragus spinosulus	Schmidt, 1862	Sarcotragus spinosulus Schmidt, 1862
103	MIB	Adriatic Sea	San Foca	40.3241782	18.4662928	Porifera	Demospongiae	Dictyoceratida	Spongiidae	Spongia	Spongia (Spongia) lamella	(Schulze, 1879)	Spongia (Spongia) lamella (Schulze, 1879)
104	MIB	Adriatic Sea	Otranto	40.1288590	18.520781	Porifera	Demospongiae	Dictyoceratida	Spongiidae	Spongia	Spongia (Spongia) nitens	(Schmidt, 1862)	Spongia (Spongia ) nitens (Schmidt, 1862)
105	MIB	Adriatic Sea	Monopoli	40.98221667	17.28620278	Porifera	Demospongiae	Dictyoceratida	Spongiidae	Spongia	Spongia (Spongia) officinalis	Linnaeus, 1759	Spongia (Spongia) officinalis Linnaeus, 1759
105	MIB	Adriatic Sea	San Foca	40.3241782	18.4662928	Porifera	Demospongiae	Dictyoceratida	Spongiidae	Spongia	Spongia (Spongia) officinalis	Linnaeus, 1759	Spongia (Spongia) officinalis Linnaeus, 1759
105	MAB	Adriatic Sea	San Foca	40.32417820	18.46629286	Porifera	Demospongiae	Dictyoceratida	Spongiidae	Spongia	Spongia (Spongia) officinalis	Linnaeus, 1759	Spongia (Spongia) officinalis Linnaeus, 1759
106	MIB	Adriatic Sea	San Foca	40.3241782	18.4662928	Porifera	Demospongiae	Dictyoceratida	Spongiidae	Spongia	Spongia (Spongia) virgultosa	(Schmidt, 1868)	Spongia (Spongia) virgultosa (Schmidt, 1868)
107	MAB	Adriatic Sea	Otranto	40.12885900	18.520781	Porifera	Demospongiae	Dictyoceratida	Spongiidae	Cacospongia	Cacospongia mollior	Schmidt, 1862	Cacospongia mollior Schmidt, 1862
108	MIB	Adriatic Sea	Otranto	40.1288590	18.520781	Porifera	Demospongiae	Dictyoceratida	Thorectidae	Fasciospongia	Fasciospongia cavernosa	(Schmidt, 1862)	Fasciospongia cavernosa (Schmidt, 1862)
108	MIB	Adriatic Sea	Monopoli	40.98221667	17.28620278	Porifera	Demospongiae	Dictyoceratida	Thorectidae	Fasciospongia	Fasciospongia cavernosa	(Schmidt, 1862)	Fasciospongia cavernosa (Schmidt, 1862)
108	MAB	Ionian Sea	Santa Maria di Leuca	39.73114575	18.347193	Porifera	Demospongiae	Dictyoceratida	Thorectidae	Fasciospongia	Fasciospongia cavernosa	(Schmidt, 1862)	Fasciospongia cavernosa (Schmidt, 1862)
109	MAB	Adriatic Sea	San Foca	40.32417820	18.46629286	Porifera	Demospongiae	Dictyoceratida	Thorectidae	Scalarispongia	Scalarispongia proficens	(Pulitzer-Finali & Pronzato, 1981)	Scalarispongia proficens (Pulitzer-Finali & Pronzato, 1981)
110	MIB	Adriatic Sea	Otranto	40.1288590	18.520781	Porifera	Demospongiae	Dictyoceratida	Thorectidae	Scalarispongia	Scalarispongia scalaris	(Schmidt, 1862)	Scalarispongia scalaris (Schmidt, 1862)
110	MIB	Ionian Sea	Santa Maria di Leuca	39.73114575	18.347193	Porifera	Demospongiae	Dictyoceratida	Thorectidae	Scalarispongia	Scalarispongia scalaris	(Schmidt, 1862)	Scalarispongia scalaris (Schmidt, 1862)
110	MIB	Adriatic Sea	Monopoli	40.98221667	17.28620278	Porifera	Demospongiae	Dictyoceratida	Thorectidae	Scalarispongia	Scalarispongia scalaris	(Schmidt, 1862)	Scalarispongia scalaris (Schmidt, 1862)
110	MAB	Adriatic Sea	Otranto	40.12885900	18.520781	Porifera	Demospongiae	Dictyoceratida	Thorectidae	Scalarispongia	Scalarispongia scalaris	(Schmidt, 1862)	Scalarispongia scalaris (Schmidt, 1862)
110	MAB	Adriatic Sea	Monopoli	40.98221667	17.28620278	Porifera	Demospongiae	Dictyoceratida	Thorectidae	Scalarispongia	Scalarispongia scalaris	(Schmidt, 1862)	Scalarispongia scalaris (Schmidt, 1862)
110	MAB	Adriatic Sea	San Foca	40.32417820	18.46629286	Porifera	Demospongiae	Dictyoceratida	Thorectidae	Scalarispongia	Scalarispongia scalaris	(Schmidt, 1862)	Scalarispongia scalaris (Schmidt, 1862)
111	MAB	Adriatic Sea	Otranto	40.12885900	18.520781	Porifera	Demospongiae	Haplosclerida	Chalinidae	Dendroxea	Dendroxea adumbrata	Corriero, Scalera-Liaci & Pronzato, 1996	Dendroxea adumbrata Corriero, Scalera-Liaci & Pronzato, 1996
111	MAB	Adriatic Sea	Tremiti	42.1382530	15.52244	Porifera	Demospongiae	Haplosclerida	Chalinidae	Dendroxea	Dendroxea adumbrata	Corriero, Scalera-Liaci & Pronzato, 1996	Dendroxea adumbrata Corriero, Scalera-Liaci & Pronzato, 1996
112	MIB	Adriatic Sea	Otranto	40.1288590	18.520781	Porifera	Demospongiae	Haplosclerida	Chalinidae	Dendroxea	Dendroxea lenis	(Topsent, 1892)	Dendroxea lenis (Topsent, 1892)
112	MIB	Ionian Sea	Santa Maria di Leuca	39.73114575	18.347193	Porifera	Demospongiae	Haplosclerida	Chalinidae	Dendroxea	Dendroxea lenis	(Topsent, 1892)	Dendroxea lenis (Topsent, 1892)
112	MIB	Adriatic Sea	Monopoli	40.98221667	17.28620278	Porifera	Demospongiae	Haplosclerida	Chalinidae	Dendroxea	Dendroxea lenis	(Topsent, 1892)	Dendroxea lenis (Topsent, 1892)
112	MIB	Adriatic Sea	Capitolo	40.94719344	17.449318	Porifera	Demospongiae	Haplosclerida	Chalinidae	Dendroxea	Dendroxea lenis	(Topsent, 1892)	Dendroxea lenis (Topsent, 1892)
112	MIB	Adriatic Sea	San Foca	40.3241782	18.4662928	Porifera	Demospongiae	Haplosclerida	Chalinidae	Dendroxea	Dendroxea lenis	(Topsent, 1892)	Dendroxea lenis (Topsent, 1892)
112	MAB	Adriatic Sea	Otranto	40.12885900	18.520781	Porifera	Demospongiae	Haplosclerida	Chalinidae	Dendroxea	Dendroxea lenis	(Topsent, 1892)	Dendroxea lenis (Topsent, 1892)
112	MAB	Adriatic Sea	Capitolo	40.94719344	17.449318	Porifera	Demospongiae	Haplosclerida	Chalinidae	Dendroxea	Dendroxea lenis	(Topsent, 1892)	Dendroxea lenis (Topsent, 1892)
112	MAB	Adriatic Sea	Tremiti	42.1382530	15.52244	Porifera	Demospongiae	Haplosclerida	Chalinidae	Dendroxea	Dendroxea lenis	(Topsent, 1892)	Dendroxea lenis (Topsent, 1892)
112	MAB	Adriatic Sea	San Foca	40.32417820	18.46629286	Porifera	Demospongiae	Haplosclerida	Chalinidae	Dendroxea	Dendroxea lenis	(Topsent, 1892)	Dendroxea lenis (Topsent, 1892)
113	MIB	Ionian Sea	Santa Maria di Leuca	39.73114575	18.347193	Porifera	Demospongiae	Haplosclerida	Chalinidae	Haliclona	Haliclona poecillastroides	(Vacelet, 1969)	Haliclona poecillastroides (Vacelet, 1969)
114	MIB	Adriatic Sea	Capitolo	40.94719344	17.449318	Porifera	Demospongiae	Haplosclerida	Chalinidae	Haliclona	Haliclona	Grant, 1841	Haliclona Grant, 1841
114	MIB	Adriatic Sea	Tremiti	42.13825300	15.522442	Porifera	Demospongiae	Haplosclerida	Chalinidae	Haliclona	Haliclona	Grant, 1841	Haliclona Grant, 1841
114	MAB	Adriatic Sea	San Foca	40.32417820	18.46629286	Porifera	Demospongiae	Haplosclerida	Chalinidae	Haliclona	Haliclona	Grant, 1841	Haliclona Grant, 1841
115	MIB	Ionian Sea	Santa Maria di Leuca	39.73114575	18.347193	Porifera	Demospongiae	Haplosclerida	Chalinidae	Haliclona	Haliclona (Flagellia) flagellifera	(Ridley & Dendy, 1886)	Haliclona (Flagellia) flagellifera (Ridley & Dendy, 1886)
116	MIB	Adriatic Sea	Capitolo	40.94719344	17.449318	Porifera	Demospongiae	Haplosclerida	Chalinidae	Haliclona	Haliclona (Gellius) angulata	(Bowerbank, 1866)	Haliclona (Gellius) angulata (Bowerbank, 1866)
116	MIB	Adriatic Sea	San Foca	40.3241782	18.4662928	Porifera	Demospongiae	Haplosclerida	Chalinidae	Haliclona	Haliclona (Gellius) angulata	(Bowerbank, 1866)	Haliclona (Gellius) angulata (Bowerbank, 1866)
116	MAB	Adriatic Sea	Monopoli	40.98221667	17.28620278	Porifera	Demospongiae	Haplosclerida	Chalinidae	Haliclona	Haliclona (Gellius) angulata	(Bowerbank, 1866)	Haliclona (Gellius) angulata (Bowerbank, 1866)
116	MAB	Adriatic Sea	Tremiti	42.1382530	15.52244	Porifera	Demospongiae	Haplosclerida	Chalinidae	Haliclona	Haliclona (Gellius) angulata	(Bowerbank, 1866)	Haliclona (Gellius) angulata (Bowerbank, 1866)
117	MIB	Adriatic Sea	Capitolo	40.94719344	17.449318	Porifera	Demospongiae	Haplosclerida	Chalinidae	Haliclona	Haliclona (Gellius) dubia	(Babic, 1922)	Haliclona (Gellius) dubia (Babic, 1922)
118	MIB	Adriatic Sea	San Foca	40.3241782	18.4662928	Porifera	Demospongiae	Haplosclerida	Chalinidae	Haliclona	Haliclona (Gellius) fibulata	(Schmidt, 1862)	Haliclona (Gellius) fibulata (Schmidt, 1862)
118	MAB	Adriatic Sea	Monopoli	40.98221667	17.28620278	Porifera	Demospongiae	Haplosclerida	Chalinidae	Haliclona	Haliclona (Gellius) fibulata	(Schmidt, 1862)	Haliclona (Gellius) fibulata (Schmidt, 1862)
118	MAB	Adriatic Sea	Tremiti	42.1382530	15.52244	Porifera	Demospongiae	Haplosclerida	Chalinidae	Haliclona	Haliclona (Gellius) fibulata	(Schmidt, 1862)	Haliclona (Gellius) fibulata (Schmidt, 1862)
119	MIB	Adriatic Sea	Tremiti	42.13825300	15.522442	Porifera	Demospongiae	Haplosclerida	Chalinidae	Haliclona	Haliclona (Gellius)		Haliclona (Gellius) sp.
120	MIB	Adriatic Sea	Otranto	40.1288590	18.520781	Porifera	Demospongiae	Haplosclerida	Chalinidae	Haliclona	Haliclona (Halichoclona) fulva	(Topsent, 1893)	Haliclona (Halichoclona) fulva (Topsent, 1893)
120	MIB	Adriatic Sea	Capitolo	40.94719344	17.449318	Porifera	Demospongiae	Haplosclerida	Chalinidae	Haliclona	Haliclona (Halichoclona) fulva	(Topsent, 1893)	Haliclona (Halichoclona) fulva (Topsent, 1893)
120	MIB	Adriatic Sea	Tremiti	42.13825300	15.522442	Porifera	Demospongiae	Haplosclerida	Chalinidae	Haliclona	Haliclona (Halichoclona) fulva	(Topsent, 1893)	Haliclona (Halichoclona) fulva (Topsent, 1893)
120	MAB	Adriatic Sea	Monopoli	40.98221667	17.28620278	Porifera	Demospongiae	Haplosclerida	Chalinidae	Haliclona	Haliclona (Halichoclona) fulva	(Topsent, 1893)	Haliclona (Halichoclona) fulva (Topsent, 1893)
120	MAB	Adriatic Sea	Tremiti	42.1382530	15.52244	Porifera	Demospongiae	Haplosclerida	Chalinidae	Haliclona	Haliclona (Halichoclona) fulva	(Topsent, 1893)	Haliclona (Halichoclona) fulva (Topsent, 1893)
121	MIB	Adriatic Sea	San Foca	40.3241782	18.4662928	Porifera	Demospongiae	Haplosclerida	Chalinidae	Haliclona	Haliclona (Halichoclona) perlucida	(Griessinger, 1971)	Haliclona (Halichoclona) perlucida (Griessinger, 1971)
121	MAB	Adriatic Sea	Monopoli	40.98221667	17.28620278	Porifera	Demospongiae	Haplosclerida	Chalinidae	Haliclona	Haliclona (Halichoclona) perlucida	(Griessinger, 1971)	Haliclona (Halichoclona) perlucida (Griessinger, 1971)
122	MIB	Adriatic Sea	Monopoli	40.98221667	17.28620278	Porifera	Demospongiae	Haplosclerida	Chalinidae	Haliclona	Haliclona (Haliclona) simulans	(Johnston, 1842)	Haliclona (Haliclona) simulans (Johnston, 1842)
123	MIB	Adriatic Sea	Capitolo	40.94719344	17.449318	Porifera	Demospongiae	Haplosclerida	Chalinidae	Haliclona	Haliclona (Reniera) aquaeductus	(Schmidt, 1862)	Haliclona (Reniera) aquaeductus (Schmidt, 1862)
124	MIB	Adriatic Sea	Otranto	40.1288590	18.520781	Porifera	Demospongiae	Haplosclerida	Chalinidae	Haliclona	Haliclona (Reniera) mediterranea	Griessinger, 1971	Haliclona (Reniera) mediterranea Griessinger, 1971
124	MIB	Ionian Sea	Santa Maria di Leuca	39.73114575	18.347193	Porifera	Demospongiae	Haplosclerida	Chalinidae	Haliclona	Haliclona (Reniera) mediterranea	Griessinger, 1971	Haliclona (Reniera) mediterranea Griessinger, 1971
124	MIB	Adriatic Sea	Monopoli	40.98221667	17.28620278	Porifera	Demospongiae	Haplosclerida	Chalinidae	Haliclona	Haliclona (Reniera) mediterranea	Griessinger, 1971	Haliclona (Reniera) mediterranea Griessinger, 1971
124	MIB	Adriatic Sea	Capitolo	40.94719344	17.449318	Porifera	Demospongiae	Haplosclerida	Chalinidae	Haliclona	Haliclona (Reniera) mediterranea	Griessinger, 1971	Haliclona (Reniera) mediterranea Griessinger, 1971
124	MIB	Adriatic Sea	Tremiti	42.13825300	15.522442	Porifera	Demospongiae	Haplosclerida	Chalinidae	Haliclona	Haliclona (Reniera) mediterranea	Griessinger, 1971	Haliclona (Reniera) mediterranea Griessinger, 1971
124	MIB	Adriatic Sea	San Foca	40.3241782	18.4662928	Porifera	Demospongiae	Haplosclerida	Chalinidae	Haliclona	Haliclona (Reniera) mediterranea	Griessinger, 1971	Haliclona (Reniera) mediterranea Griessinger, 1971
124	MAB	Adriatic Sea	Monopoli	40.98221667	17.28620278	Porifera	Demospongiae	Haplosclerida	Chalinidae	Haliclona	Haliclona (Reniera) mediterranea	Griessinger, 1971	Haliclona (Reniera) mediterranea Griessinger, 1971
124	MAB	Adriatic Sea	Tremiti	42.1382530	15.52244	Porifera	Demospongiae	Haplosclerida	Chalinidae	Haliclona	Haliclona (Reniera) mediterranea	Griessinger, 1971	Haliclona (Reniera) mediterranea Griessinger, 1971
125	MIB	Ionian Sea	Santa Maria di Leuca	39.73114575	18.347193	Porifera	Demospongiae	Haplosclerida	Chalinidae	Haliclona	Haliclona (Reniera)		Haliclona (Reniera) sp.
125	MIB	Adriatic Sea	Tremiti	42.13825300	15.522442	Porifera	Demospongiae	Haplosclerida	Chalinidae	Haliclona	Haliclona (Reniera)		Haliclona (Reniera) sp.
125	MIB	Adriatic Sea	San Foca	40.3241782	18.4662928	Porifera	Demospongiae	Haplosclerida	Chalinidae	Haliclona	Haliclona (Reniera)		Haliclona (Reniera) sp.
125	MAB	Ionian Sea	Santa Maria di Leuca	39.73114575	18.347193	Porifera	Demospongiae	Haplosclerida	Chalinidae	Haliclona	Haliclona (Reniera)		Haliclona (Reniera) sp.
125	MAB	Adriatic Sea	Monopoli	40.98221667	17.28620278	Porifera	Demospongiae	Haplosclerida	Chalinidae	Haliclona	Haliclona (Reniera)		Haliclona (Reniera) sp.
125	MAB	Adriatic Sea	Tremiti	42.1382530	15.52244	Porifera	Demospongiae	Haplosclerida	Chalinidae	Haliclona	Haliclona (Reniera)		Haliclona (Reniera) sp.
126	MIB	Adriatic Sea	Tremiti	42.13825300	15.522442	Porifera	Demospongiae	Haplosclerida	Chalinidae	Haliclona	Haliclona (Rhizoniera) sarai	(Pulitzer-Finali, 1969)	Haliclona (Rhizoniera) sarai (Pulitzer-Finali, 1969)
126	MAB	Adriatic Sea	Tremiti	42.1382530	15.52244	Porifera	Demospongiae	Haplosclerida	Chalinidae	Haliclona	Haliclona (Rhizoniera) sarai	(Pulitzer-Finali, 1969)	Haliclona (Rhizoniera) sarai (Pulitzer-Finali, 1969)
127	MAB	Adriatic Sea	Capitolo	40.94719344	17.449318	Porifera	Demospongiae	Haplosclerida	Petrosiidae	Petrosia	Petrosia (Petrosia) clavata	(Esper, 1794)	Petrosia (Petrosia) clavata (Esper, 1794)
128	MIB	Adriatic Sea	Otranto	40.1288590	18.520781	Porifera	Demospongiae	Haplosclerida	Petrosiidae	Petrosia	Petrosia (Petrosia) ficiformis	(Poiret, 1789)	Petrosia (Petrosia) ficiformis (Poiret, 1789)
128	MIB	Adriatic Sea	Monopoli	40.98221667	17.28620278	Porifera	Demospongiae	Haplosclerida	Petrosiidae	Petrosia	Petrosia (Petrosia) ficiformis	(Poiret, 1789)	Petrosia (Petrosia) ficiformis (Poiret, 1789)
128	MIB	Adriatic Sea	Tremiti	42.13825300	15.522442	Porifera	Demospongiae	Haplosclerida	Petrosiidae	Petrosia	Petrosia (Petrosia) ficiformis	(Poiret, 1789)	Petrosia (Petrosia) ficiformis (Poiret, 1789)
128	MIB	Adriatic Sea	San Foca	40.3241782	18.4662928	Porifera	Demospongiae	Haplosclerida	Petrosiidae	Petrosia	Petrosia (Petrosia) ficiformis	(Poiret, 1789)	Petrosia (Petrosia) ficiformis (Poiret, 1789)
128	MAB	Adriatic Sea	Otranto	40.12885900	18.520781	Porifera	Demospongiae	Haplosclerida	Petrosiidae	Petrosia	Petrosia (Petrosia) ficiformis	(Poiret, 1789)	Petrosia (Petrosia) ficiformis (Poiret, 1789)
128	MAB	Ionian Sea	Santa Maria di Leuca	39.73114575	18.347193	Porifera	Demospongiae	Haplosclerida	Petrosiidae	Petrosia	Petrosia (Petrosia) ficiformis	(Poiret, 1789)	Petrosia (Petrosia) ficiformis (Poiret, 1789)
128	MAB	Adriatic Sea	Monopoli	40.98221667	17.28620278	Porifera	Demospongiae	Haplosclerida	Petrosiidae	Petrosia	Petrosia (Petrosia) ficiformis	(Poiret, 1789)	Petrosia (Petrosia) ficiformis (Poiret, 1789)
128	MAB	Adriatic Sea	Capitolo	40.94719344	17.449318	Porifera	Demospongiae	Haplosclerida	Petrosiidae	Petrosia	Petrosia (Petrosia) ficiformis	(Poiret, 1789)	Petrosia (Petrosia) ficiformis (Poiret, 1789)
128	MAB	Adriatic Sea	Tremiti	42.1382530	15.52244	Porifera	Demospongiae	Haplosclerida	Petrosiidae	Petrosia	Petrosia (Petrosia) ficiformis	(Poiret, 1789)	Petrosia (Petrosia) ficiformis (Poiret, 1789)
128	MAB	Adriatic Sea	San Foca	40.32417820	18.46629286	Porifera	Demospongiae	Haplosclerida	Petrosiidae	Petrosia	Petrosia (Petrosia) ficiformis	(Poiret, 1789)	Petrosia (Petrosia) ficiformis (Poiret, 1789)
129	MIB	Adriatic Sea	Tremiti	42.13825300	15.522442	Porifera	Demospongiae	Haplosclerida	Phloeodictyidae	Oceanapia	Oceanapia isodictyiformis	(Carter, 1882)	Oceanapia isodictyiformis (Carter, 1882)
129	MAB	Ionian Sea	Santa Maria di Leuca	39.73114575	18.347193	Porifera	Demospongiae	Haplosclerida	Phloeodictyidae	Oceanapia	Oceanapia isodictyiformis	(Carter, 1882)	Oceanapia isodictyiformis (Carter, 1882)
130	MAB	Adriatic Sea	Capitolo	40.94719344	17.449318	Porifera	Demospongiae	Haplosclerida	Phloeodictyidae	Oceanapia	Oceanapia vacua	(Sarà, 1961)	Oceanapia vacua (Sarà, 1961)
131	MIB	Adriatic Sea	Otranto	40.1288590	18.520781	Porifera	Demospongiae	Haplosclerida	Phloeodictyidae	Siphonodictyon	Siphonodictyon infestum	(Johnson, 1899)	Siphonodictyon infestum (Johnson, 1899)
131	MIB	Ionian Sea	Santa Maria di Leuca	39.73114575	18.347193	Porifera	Demospongiae	Haplosclerida	Phloeodictyidae	Siphonodictyon	Siphonodictyon infestum	(Johnson, 1899)	Siphonodictyon infestum (Johnson, 1899)
132	MIB	Adriatic Sea	Monopoli	40.98221667	17.28620278	Porifera	Demospongiae	Poecilosclerida	Coelosphaeridae	Lissodendoryx	Lissodendoryx (Anomodoryx) cavernosa	(Topsent, 1892)	Lissodendoryx (Anomodoryx) cavernosa (Topsent, 1892)
133	MAB	Adriatic Sea	Monopoli	40.98221667	17.28620278	Porifera	Demospongiae	Poecilosclerida	Coelosphaeridae	Lissodendoryx	Lissodendoryx (Lissodendoryx) isodictyalis	(Carter, 1882)	Lissodendoryx (Lissodendoryx) isodictyalis (Carter, 1882)
134	MIB	Adriatic Sea	Otranto	40.1288590	18.520781	Porifera	Demospongiae	Poecilosclerida	Crambeidae	Crambe	Crambe crambe	(Schmidt, 1862)	Crambe crambe (Schmidt, 1862)
134	MIB	Ionian Sea	Santa Maria di Leuca	39.73114575	18.347193	Porifera	Demospongiae	Poecilosclerida	Crambeidae	Crambe	Crambe crambe	(Schmidt, 1862)	Crambe crambe (Schmidt, 1862)
134	MIB	Adriatic Sea	Tremiti	42.13825300	15.522442	Porifera	Demospongiae	Poecilosclerida	Crambeidae	Crambe	Crambe crambe	(Schmidt, 1862)	Crambe crambe (Schmidt, 1862)
134	MAB	Adriatic Sea	Otranto	40.12885900	18.520781	Porifera	Demospongiae	Poecilosclerida	Crambeidae	Crambe	Crambe crambe	(Schmidt, 1862)	Crambe crambe (Schmidt, 1862)
134	MAB	Ionian Sea	Santa Maria di Leuca	39.73114575	18.347193	Porifera	Demospongiae	Poecilosclerida	Crambeidae	Crambe	Crambe crambe	(Schmidt, 1862)	Crambe crambe (Schmidt, 1862)
135	MIB	Adriatic Sea	Otranto	40.1288590	18.520781	Porifera	Demospongiae	Poecilosclerida	Hymedesmiidae	Hemimycale	Hemimycale columella	(Bowerbank, 1874)	Hemimycale columella (Bowerbank, 1874)
135	MIB	Adriatic Sea	Capitolo	40.94719344	17.449318	Porifera	Demospongiae	Poecilosclerida	Hymedesmiidae	Hemimycale	Hemimycale columella	(Bowerbank, 1874)	Hemimycale columella (Bowerbank, 1874)
135	MAB	Adriatic Sea	Tremiti	42.1382530	15.52244	Porifera	Demospongiae	Poecilosclerida	Hymedesmiidae	Hemimycale	Hemimycale columella	(Bowerbank, 1874)	Hemimycale columella (Bowerbank, 1874)
136	MAB	Adriatic Sea	Monopoli	40.98221667	17.28620278	Porifera	Demospongiae	Poecilosclerida	Hymedesmiidae	Hymedesmia	Hymedesmia (Hymedesmia) pansa	Bowerbank, 1882	Hymedesmia (Hymedesmia) pansa Bowerbank, 1882
137	MAB	Adriatic Sea	Capitolo	40.94719344	17.449318	Porifera	Demospongiae	Poecilosclerida	Hymedesmiidae	Hymedesmia	Hymedesmia (Hymedesmia) simillima	Lundbeck, 1910	Hymedesmia (Hymedesmia) simillima Lundbeck, 1910
138	MIB	Adriatic Sea	Tremiti	42.13825300	15.522442	Porifera	Demospongiae	Poecilosclerida	Hymedesmiidae	Hymedesmia	Hymedesmia (Stylopus) coriacea	(Fristedt, 1885)	Hymedesmia (Stylopus) coriacea (Fristedt, 1885)
138	MAB	Adriatic Sea	Capitolo	40.94719344	17.449318	Porifera	Demospongiae	Poecilosclerida	Hymedesmiidae	Hymedesmia	Hymedesmia (Stylopus) coriacea	(Fristedt, 1885)	Hymedesmia (Stylopus) coriacea (Fristedt, 1885)
139	MIB	Adriatic Sea	Capitolo	40.94719344	17.449318	Porifera	Demospongiae	Poecilosclerida	Hymedesmiidae	Hymedesmia	Hymedesmia	Bowerbank, 1864	Hymedesmia Bowerbank, 1864
139	MIB	Adriatic Sea	Tremiti	42.13825300	15.522442	Porifera	Demospongiae	Poecilosclerida	Hymedesmiidae	Hymedesmia	Hymedesmia	Bowerbank, 1864	Hymedesmia Bowerbank, 1864
139	MIB	Adriatic Sea	San Foca	40.3241782	18.4662928	Porifera	Demospongiae	Poecilosclerida	Hymedesmiidae	Hymedesmia	Hymedesmia	Bowerbank, 1864	Hymedesmia Bowerbank, 1864
140	MAB	Adriatic Sea	Capitolo	40.94719344	17.449318	Porifera	Demospongiae	Poecilosclerida	Hymedesmiidae	Phorbas	Phorbas dives	(Topsent, 1891)	Phorbas dives (Topsent, 1891)
141	MIB	Adriatic Sea	Monopoli	40.98221667	17.28620278	Porifera	Demospongiae	Poecilosclerida	Hymedesmiidae	Phorbas	Phorbas fibulatus	(Topsent, 1893)	Phorbas fibulatus (Topsent, 1893)
142	MIB	Adriatic Sea	Monopoli	40.98221667	17.28620278	Porifera	Demospongiae	Poecilosclerida	Hymedesmiidae	Phorbas	Phorbas fictitius	(Bowerbank, 1866)	Phorbas fictitius (Bowerbank, 1866)
142	MIB	Adriatic Sea	Capitolo	40.94719344	17.449318	Porifera	Demospongiae	Poecilosclerida	Hymedesmiidae	Phorbas	Phorbas fictitius	(Bowerbank, 1866)	Phorbas fictitius (Bowerbank, 1866)
142	MIB	Adriatic Sea	Tremiti	42.13825300	15.522442	Porifera	Demospongiae	Poecilosclerida	Hymedesmiidae	Phorbas	Phorbas fictitius	(Bowerbank, 1866)	Phorbas fictitius (Bowerbank, 1866)
142	MIB	Adriatic Sea	San Foca	40.3241782	18.4662928	Porifera	Demospongiae	Poecilosclerida	Hymedesmiidae	Phorbas	Phorbas fictitius	(Bowerbank, 1866)	Phorbas fictitius (Bowerbank, 1866)
142	MAB	Adriatic Sea	Monopoli	40.98221667	17.28620278	Porifera	Demospongiae	Poecilosclerida	Hymedesmiidae	Phorbas	Phorbas fictitius	(Bowerbank, 1866)	Phorbas fictitius (Bowerbank, 1866)
142	MAB	Adriatic Sea	Capitolo	40.94719344	17.449318	Porifera	Demospongiae	Poecilosclerida	Hymedesmiidae	Phorbas	Phorbas fictitius	(Bowerbank, 1866)	Phorbas fictitius (Bowerbank, 1866)
142	MAB	Adriatic Sea	Tremiti	42.1382530	15.52244	Porifera	Demospongiae	Poecilosclerida	Hymedesmiidae	Phorbas	Phorbas fictitius	(Bowerbank, 1866)	Phorbas fictitius (Bowerbank, 1866)
143	MIB	Adriatic Sea	Otranto	40.1288590	18.520781	Porifera	Demospongiae	Poecilosclerida	Hymedesmiidae	Phorbas	Phorbas tenacior	(Topsent, 1925)	Phorbas tenacior (Topsent, 1925)
143	MIB	Ionian Sea	Santa Maria di Leuca	39.73114575	18.347193	Porifera	Demospongiae	Poecilosclerida	Hymedesmiidae	Phorbas	Phorbas tenacior	(Topsent, 1925)	Phorbas tenacior (Topsent, 1925)
143	MIB	Adriatic Sea	Monopoli	40.98221667	17.28620278	Porifera	Demospongiae	Poecilosclerida	Hymedesmiidae	Phorbas	Phorbas tenacior	(Topsent, 1925)	Phorbas tenacior (Topsent, 1925)
143	MAB	Adriatic Sea	Otranto	40.12885900	18.520781	Porifera	Demospongiae	Poecilosclerida	Hymedesmiidae	Phorbas	Phorbas tenacior	(Topsent, 1925)	Phorbas tenacior (Topsent, 1925)
143	MAB	Ionian Sea	Santa Maria di Leuca	39.73114575	18.347193	Porifera	Demospongiae	Poecilosclerida	Hymedesmiidae	Phorbas	Phorbas tenacior	(Topsent, 1925)	Phorbas tenacior (Topsent, 1925)
143	MAB	Adriatic Sea	Tremiti	42.1382530	15.52244	Porifera	Demospongiae	Poecilosclerida	Hymedesmiidae	Phorbas	Phorbas tenacior	(Topsent, 1925)	Phorbas tenacior (Topsent, 1925)
144	MAB	Adriatic Sea	Otranto	40.12885900	18.520781	Porifera	Demospongiae	Poecilosclerida	Hymedesmiidae	Phorbas	Phorbas topsenti	Vacelet & Perez, 2008	Phorbas topsenti Vacelet & Perez, 2008
145	MIB	Adriatic Sea	Capitolo	40.94719344	17.449318	Porifera	Demospongiae	Poecilosclerida	Microcionidae	Antho	Antho (Acarnia) coriacea	(Bowerbank, 1874)	Antho (Acarnia) coriacea (Bowerbank, 1874)
146	MAB	Adriatic Sea	Monopoli	40.98221667	17.28620278	Porifera	Demospongiae	Poecilosclerida	Microcionidae	Antho	Antho (Antho) involvens	(Schmidt, 1864)	Antho (Antho) involvens (Schmidt, 1864)
147	MIB	Ionian Sea	Santa Maria di Leuca	39.73114575	18.347193	Porifera	Demospongiae	Poecilosclerida	Microcionidae	Clathria	Clathria (Clathria) toxistricta	(Topsent, 1925)	Clathria (Clathria ) toxistricta (Topsent, 1925)
148	MIB	Adriatic Sea	Capitolo	40.94719344	17.449318	Porifera	Demospongiae	Poecilosclerida	Microcionidae	Clathria	Clathria (Clathria) toxistyla	(Sarà, 1959)	Clathria (Clathria) toxistyla (Sarà, 1959)
149	MIB	Adriatic Sea	Capitolo	40.94719344	17.449318	Porifera	Demospongiae	Poecilosclerida	Microcionidae	Clathria	Clathria (Microciona) armata	(Bowerbank, 1862)	Clathria (Microciona) armata (Bowerbank, 1862)
150	MIB	Adriatic Sea	Tremiti	42.13825300	15.522442	Porifera	Demospongiae	Poecilosclerida	Microcionidae	Clathria	Clathria (Microciona) cleistochela	Topsent, 1925	Clathria (Microciona) cleistochela Topsent, 1925
151	MIB	Adriatic Sea	Otranto	40.1288590	18.520781	Porifera	Demospongiae	Poecilosclerida	Microcionidae	Clathria	Clathria (Microciona) gradalis	Topsent, 1925	Clathria (Microciona ) gradalis Topsent, 1925
152	MIB	Ionian Sea	Santa Maria di Leuca	39.73114575	18.347193	Porifera	Demospongiae	Poecilosclerida	Microcionidae	Clathria	Clathria (Microciona) spinarcus	(Carter & Hope, 1889)	Clathria (Microciona) spinarcus (Carter & Hope, 1889)
153	MIB	Adriatic Sea	Capitolo	40.94719344	17.449318	Porifera	Demospongiae	Poecilosclerida	Microcionidae	Clathria	Clathria (Microciona) strepsitoxa	(Hope, 1889)	Clathria (Microciona) strepsitoxa (Hope, 1889)
154	MAB	Adriatic Sea	Capitolo	40.94719344	17.449318	Porifera	Demospongiae	Poecilosclerida	Microcionidae	Clathria	Clathria (Microciona) toxitenuis	Topsent, 1925	Clathria (Microciona) toxitenuis Topsent, 1925
155	MIB	Adriatic Sea	Otranto	40.1288590	18.520781	Porifera	Demospongiae	Poecilosclerida	Microcionidae	Clathria	Clathria	Schmidt, 1862	Clathria Schmidt, 1862
155	MIB	Adriatic Sea	Capitolo	40.94719344	17.449318	Porifera	Demospongiae	Poecilosclerida	Microcionidae	Clathria	Clathria	Schmidt, 1862	Clathria Schmidt, 1862
155	MAB	Adriatic Sea	San Foca	40.32417820	18.46629286	Porifera	Demospongiae	Poecilosclerida	Microcionidae	Clathria	Clathria	Schmidt, 1862	Clathria Schmidt, 1862
156	MIB	Adriatic Sea	Monopoli	40.98221667	17.28620278	Porifera	Demospongiae	Poecilosclerida	Mycalidae	Mycale	Mycale (Aegogropila) contarenii	(Lieberkühn, 1859)	Mycale (Aegogropila) contarenii (Lieberkühn, 1859)
156	MIB	Adriatic Sea	Capitolo	40.94719344	17.449318	Porifera	Demospongiae	Poecilosclerida	Mycalidae	Mycale	Mycale (Aegogropila) contarenii	(Lieberkühn, 1859)	Mycale (Aegogropila) contarenii (Lieberkühn, 1859)
156	MAB	Adriatic Sea	Monopoli	40.98221667	17.28620278	Porifera	Demospongiae	Poecilosclerida	Mycalidae	Mycale	Mycale (Aegogropila) contarenii	(Lieberkühn, 1859)	Mycale (Aegogropila) contarenii (Lieberkühn, 1859)
157	MIB	Adriatic Sea	Capitolo	40.94719344	17.449318	Porifera	Demospongiae	Poecilosclerida	Mycalidae	Mycale	Mycale (Aegogropila) rotalis	(Bowerbank, 1874)	Mycale (Aegogropila) rotalis (Bowerbank, 1874)
158	MIB	Adriatic Sea	Monopoli	40.98221667	17.28620278	Porifera	Demospongiae	Poecilosclerida	Mycalidae	Mycale	Mycale (Aegogropila) tunicata	(Schmidt, 1862)	Mycale (Aegogropila) tunicata (Schmidt, 1862)
158	MIB	Adriatic Sea	San Foca	40.3241782	18.4662928	Porifera	Demospongiae	Poecilosclerida	Mycalidae	Mycale	Mycale (Aegogropila) tunicata	(Schmidt, 1862)	Mycale (Aegogropila) tunicata (Schmidt, 1862)
159	MAB	Adriatic Sea	Monopoli	40.98221667	17.28620278	Porifera	Demospongiae	Poecilosclerida	Mycalidae	Mycale	Mycale (Carmia) macilenta	(Bowerbank, 1866)	Mycale (Carmia) macilenta (Bowerbank, 1866)
160	MIB	Ionian Sea	Santa Maria di Leuca	39.73114575	18.347193	Porifera	Demospongiae	Poecilosclerida	Mycalidae	Mycale	Mycale (Mycale) lingua	(Bowerbank, 1866)	Mycale (Mycale) lingua (Bowerbank, 1866)
160	MAB	Adriatic Sea	San Foca	40.32417820	18.46629286	Porifera	Demospongiae	Poecilosclerida	Mycalidae	Mycale	Mycale (Mycale) lingua	(Bowerbank, 1866)	Mycale (Mycale) lingua (Bowerbank, 1866)
161	MAB	Adriatic Sea	Otranto	40.12885900	18.520781	Porifera	Demospongiae	Poecilosclerida	Mycalidae	Mycale	Mycale (Mycale) massa	(Schmidt, 1862)	Mycale (Mycale) massa (Schmidt, 1862)
161	MAB	Adriatic Sea	Monopoli	40.98221667	17.28620278	Porifera	Demospongiae	Poecilosclerida	Mycalidae	Mycale	Mycale (Mycale) massa	(Schmidt, 1862)	Mycale (Mycale) massa (Schmidt, 1862)
161	MAB	Adriatic Sea	Capitolo	40.94719344	17.449318	Porifera	Demospongiae	Poecilosclerida	Mycalidae	Mycale	Mycale (Mycale) massa	(Schmidt, 1862)	Mycale (Mycale) massa (Schmidt, 1862)
161	MAB	Adriatic Sea	Tremiti	42.1382530	15.52244	Porifera	Demospongiae	Poecilosclerida	Mycalidae	Mycale	Mycale (Mycale) massa	(Schmidt, 1862)	Mycale (Mycale) massa (Schmidt, 1862)
161	MAB	Adriatic Sea	San Foca	40.32417820	18.46629286	Porifera	Demospongiae	Poecilosclerida	Mycalidae	Mycale	Mycale (Mycale) massa	(Schmidt, 1862)	Mycale (Mycale) massa (Schmidt, 1862)
162	MIB	Adriatic Sea	Capitolo	40.94719344	17.449318	Porifera	Demospongiae	Poecilosclerida	Mycalidae	Mycale	Mycale	Gray, 1867	Mycale Gray, 1867
163	MAB	Adriatic Sea	Tremiti	42.1382530	15.52244	Porifera	Demospongiae	Poecilosclerida	Myxillidae	Melonanchora	Melonanchora emphysema	(Schmidt, 1875)	Melonanchora emphysema (Schmidt, 1875)
164	MAB	Adriatic Sea	Monopoli	40.98221667	17.28620278	Porifera	Demospongiae	Poecilosclerida	Tedaniidae	Tedania	Tedania (Tedania) anhelans	(Vio in Olivi, 1792)	Tedania (Tedania) anhelans (Vio in Olivi, 1792)
165	MIB	Adriatic Sea	Capitolo	40.94719344	17.449318	Porifera	Demospongiae	Suberitida	Halichondriidae	Axinyssa	Axinyssa aurantiaca	(Schmidt, 1864)	Axinyssa aurantiaca (Schmidt, 1864)
165	MAB	Adriatic Sea	Capitolo	40.94719344	17.449318	Porifera	Demospongiae	Suberitida	Halichondriidae	Axinyssa	Axinyssa aurantiaca	(Schmidt, 1864)	Axinyssa aurantiaca (Schmidt, 1864)
165	MAB	Adriatic Sea	Tremiti	42.1382530	15.52244	Porifera	Demospongiae	Suberitida	Halichondriidae	Axinyssa	Axinyssa aurantiaca	(Schmidt, 1864)	Axinyssa aurantiaca (Schmidt, 1864)
166	MAB	Adriatic Sea	Otranto	40.12885900	18.520781	Porifera	Demospongiae	Suberitida	Halichondriidae	Axinyssa	Axinyssa digitata	(Cabioch, 1968)	Axinyssa digitata (Cabioch, 1968)
166	MAB	Adriatic Sea	Tremiti	42.1382530	15.52244	Porifera	Demospongiae	Suberitida	Halichondriidae	Axinyssa	Axinyssa digitata	(Cabioch, 1968)	Axinyssa digitata (Cabioch, 1968)
167	MIB	Adriatic Sea	Capitolo	40.94719344	17.449318	Porifera	Demospongiae	Suberitida	Halichondriidae	Axinyssa	Axinyssa	Lendenfeld, 1897	Axinyssa Lendenfeld, 1897
168	MAB	Adriatic Sea	Otranto	40.12885900	18.520781	Porifera	Demospongiae	Suberitida	Halichondriidae	Halichondria	Halichondria (Halichondria) semitubulosa	Lieberkühn, 1859	Halichondria semitubulosa Lieberkühn, 1859
169	MIB	Adriatic Sea	Capitolo	40.94719344	17.449318	Porifera	Demospongiae	Suberitida	Halichondriidae	Halichondria	Halichondria (Halichondria) bowerbanki	Burton, 1930	Halichondria (Halichondria) bowerbanki Burton, 1930
169	MIB	Adriatic Sea	San Foca	40.3241782	18.4662928	Porifera	Demospongiae	Suberitida	Halichondriidae	Halichondria	Halichondria (Halichondria) bowerbanki	Burton, 1930	Halichondria (Halichondria) bowerbanki Burton, 1930
170	MIB	Adriatic Sea	Capitolo	40.94719344	17.449318	Porifera	Demospongiae	Suberitida	Halichondriidae	Halichondria	Halichondria (Halichondria) contorta	(Sarà, 1961)	Halichondria (Halichondria) contorta (Sarà, 1961)
170	MIB	Adriatic Sea	San Foca	40.3241782	18.4662928	Porifera	Demospongiae	Suberitida	Halichondriidae	Halichondria	Halichondria (Halichondria) contorta	(Sarà, 1961)	Halichondria (Halichondria) contorta (Sarà, 1961)
170	MAB	Adriatic Sea	San Foca	40.32417820	18.46629286	Porifera	Demospongiae	Suberitida	Halichondriidae	Halichondria	Halichondria (Halichondria) contorta	(Sarà, 1961)	Halichondria (Halichondria) contorta (Sarà, 1961)
171	MIB	Adriatic Sea	Capitolo	40.94719344	17.449318	Porifera	Demospongiae	Suberitida	Halichondriidae	Halichondria	Halichondria (Halichondria) panicea	(Pallas, 1766)	Halichondria (Halichondria) panicea (Pallas, 1766)
171	MAB	Adriatic Sea	Monopoli	40.98221667	17.28620278	Porifera	Demospongiae	Suberitida	Halichondriidae	Halichondria	Halichondria (Halichondria) panicea	(Pallas, 1766)	Halichondria (Halichondria) panicea (Pallas, 1766)
171	MAB	Adriatic Sea	Tremiti	42.1382530	15.52244	Porifera	Demospongiae	Suberitida	Halichondriidae	Halichondria	Halichondria (Halichondria) panicea	(Pallas, 1766)	Halichondria (Halichondria) panicea (Pallas, 1766)
172	MIB	Adriatic Sea	Capitolo	40.94719344	17.449318	Porifera	Demospongiae	Suberitida	Halichondriidae	Halichondria	Halichondria (Halichondria) semitubulosa	(Lamarck, 1814)	Halichondria (Halichondria) semitubulosa (Lamarck, 1814)
173	MIB	Adriatic Sea	Capitolo	40.94719344	17.449318	Porifera	Demospongiae	Suberitida	Halichondriidae	Halichondria	Halichondria	Fleming, 1828	Halichondria Fleming, 1828
173	MIB	Adriatic Sea	Tremiti	42.13825300	15.522442	Porifera	Demospongiae	Suberitida	Halichondriidae	Halichondria	Halichondria	Fleming, 1828	Halichondria Fleming, 1828
173	MIB	Adriatic Sea	San Foca	40.3241782	18.4662928	Porifera	Demospongiae	Suberitida	Halichondriidae	Halichondria	Halichondria	Fleming, 1828	Halichondria Fleming, 1828
173	MAB	Ionian Sea	Santa Maria di Leuca	39.73114575	18.347193	Porifera	Demospongiae	Suberitida	Halichondriidae	Halichondria	Halichondria	Fleming, 1828	Halichondria Fleming, 1828
173	MAB	Adriatic Sea	Tremiti	42.1382530	15.52244	Porifera	Demospongiae	Suberitida	Halichondriidae	Halichondria	Halichondria	Fleming, 1828	Halichondria Fleming, 1828
173	MAB	Adriatic Sea	San Foca	40.32417820	18.46629286	Porifera	Demospongiae	Suberitida	Halichondriidae	Halichondria	Halichondria	Fleming, 1828	Halichondria Fleming, 1828
174	MIB	Adriatic Sea	Capitolo	40.94719344	17.449318	Porifera	Demospongiae	Suberitida	Halichondriidae	Spongosorites	Spongosorites intricatus	(Topsent, 1892)	Spongosorites intricatus (Topsent, 1892)
174	MIB	Adriatic Sea	San Foca	40.3241782	18.4662928	Porifera	Demospongiae	Suberitida	Halichondriidae	Spongosorites	Spongosorites intricatus	(Topsent, 1892)	Spongosorites intricatus (Topsent, 1892)
174	MAB	Adriatic Sea	Tremiti	42.1382530	15.52244	Porifera	Demospongiae	Suberitida	Halichondriidae	Spongosorites	Spongosorites intricatus	(Topsent, 1892)	Spongosorites intricatus (Topsent, 1892)
175	MIB	Ionian Sea	Santa Maria di Leuca	39.73114575	18.347193	Porifera	Demospongiae	Suberitida	Halichondriidae	Topsentia	Topsentia pachastrelloides	(Topsent, 1892)	Topsentia pachastrelloides (Topsent, 1892)
175	MIB	Adriatic Sea	Capitolo	40.94719344	17.449318	Porifera	Demospongiae	Suberitida	Halichondriidae	Topsentia	Topsentia pachastrelloides	(Topsent, 1892)	Topsentia pachastrelloides (Topsent, 1892)
175	MIB	Adriatic Sea	Tremiti	42.13825300	15.522442	Porifera	Demospongiae	Suberitida	Halichondriidae	Topsentia	Topsentia pachastrelloides	(Topsent, 1892)	Topsentia pachastrelloides (Topsent, 1892)
176	MAB	Ionian Sea	Santa Maria di Leuca	39.73114575	18.347193	Porifera	Demospongiae	Suberitida	Suberitidae	Aaptos	Aaptos aaptos	(Schmidt, 1864)	Aaptos aaptos (Schmidt, 1864)
176	MAB	Adriatic Sea	Capitolo	40.94719344	17.449318	Porifera	Demospongiae	Suberitida	Suberitidae	Aaptos	Aaptos aaptos	(Schmidt, 1864)	Aaptos aaptos (Schmidt, 1864)
176	MAB	Adriatic Sea	Tremiti	42.1382530	15.52244	Porifera	Demospongiae	Suberitida	Suberitidae	Aaptos	Aaptos aaptos	(Schmidt, 1864)	Aaptos aaptos (Schmidt, 1864)
177	MIB	Ionian Sea	Santa Maria di Leuca	39.73114575	18.347193	Porifera	Demospongiae	Suberitida	Suberitidae	Protosuberites	Protosuberites denhartogi	van Soest & de Kluijver, 2003	Protosuberites denhartogi van Soest & de Kluijver, 2003
177	MIB	Adriatic Sea	Monopoli	40.98221667	17.28620278	Porifera	Demospongiae	Suberitida	Suberitidae	Protosuberites	Protosuberites denhartogi	van Soest & de Kluijver, 2003	Protosuberites denhartogi van Soest & de Kluijver, 2003
177	MIB	Adriatic Sea	San Foca	40.3241782	18.4662928	Porifera	Demospongiae	Suberitida	Suberitidae	Protosuberites	Protosuberites denhartogi	van Soest & de Kluijver, 2003	Protosuberites denhartogi van Soest & de Kluijver, 2003
177	MAB	Adriatic Sea	Monopoli	40.98221667	17.28620278	Porifera	Demospongiae	Suberitida	Suberitidae	Protosuberites	Protosuberites denhartogi	van Soest & de Kluijver, 2003	Protosuberites denhartogi van Soest & de Kluijver, 2003
178	MAB	Ionian Sea	Santa Maria di Leuca	39.73114575	18.347193	Porifera	Demospongiae	Suberitida	Suberitidae	Pseudosuberites	Pseudosuberites sulphureus	(Bowerbank, 1866)	Pseudosuberites sulphureus (Bowerbank, 1866)
178	MAB	Adriatic Sea	Monopoli	40.98221667	17.28620278	Porifera	Demospongiae	Suberitida	Suberitidae	Pseudosuberites	Pseudosuberites sulphureus	(Bowerbank, 1866)	Pseudosuberites sulphureus (Bowerbank, 1866)
179	MIB	Adriatic Sea	Monopoli	40.98221667	17.28620278	Porifera	Demospongiae	Suberitida	Suberitidae	Suberites	Suberites carnosus	(Johnston, 1842)	Suberites carnosus (Johnston, 1842)
179	MAB	Adriatic Sea	Monopoli	40.98221667	17.28620278	Porifera	Demospongiae	Suberitida	Suberitidae	Suberites	Suberites carnosus	(Johnston, 1842)	Suberites carnosus (Johnston, 1842)
180	MIB	Adriatic Sea	Monopoli	40.98221667	17.28620278	Porifera	Demospongiae	Suberitida	Suberitidae	Suberites	Suberites massa	Nardo, 1847	Suberites massa Nardo, 1847
181	MIB	Adriatic Sea	San Foca	40.3241782	18.4662928	Porifera	Demospongiae	Suberitida	Suberitidae	Suberites	Suberites mollis	Ridley & Dendy, 1886	Suberites mollis Ridley & Dendy, 1886
181	MAB	Adriatic Sea	Capitolo	40.94719344	17.449318	Porifera	Demospongiae	Suberitida	Suberitidae	Suberites	Suberites mollis	Ridley & Dendy, 1886	Suberites mollis Ridley & Dendy, 1886
182	MIB	Adriatic Sea	Otranto	40.1288590	18.520781	Porifera	Demospongiae	Suberitida	Suberitidae	Suberites	Suberites syringella	(Schmidt, 1868)	Suberites syringella (Schmidt, 1868)
182	MIB	Adriatic Sea	Monopoli	40.98221667	17.28620278	Porifera	Demospongiae	Suberitida	Suberitidae	Suberites	Suberites syringella	(Schmidt, 1868)	Suberites syringella (Schmidt, 1868)
183	MIB	Adriatic Sea	Otranto	40.1288590	18.520781	Porifera	Demospongiae	Suberitida	Suberitidae	Suberites	Suberites	Nardo, 1833	Suberites Nardo, 1833
183	MIB	Ionian Sea	Santa Maria di Leuca	39.73114575	18.347193	Porifera	Demospongiae	Suberitida	Suberitidae	Suberites	Suberites	Nardo, 1833	Suberites Nardo, 1833
183	MIB	Adriatic Sea	Monopoli	40.98221667	17.28620278	Porifera	Demospongiae	Suberitida	Suberitidae	Suberites	Suberites	Nardo, 1833	Suberites Nardo, 1833
183	MIB	Adriatic Sea	Capitolo	40.94719344	17.449318	Porifera	Demospongiae	Suberitida	Suberitidae	Suberites	Suberites	Nardo, 1833	Suberites Nardo, 1833
183	MIB	Adriatic Sea	San Foca	40.3241782	18.4662928	Porifera	Demospongiae	Suberitida	Suberitidae	Suberites	Suberites	Nardo, 1833	Suberites Nardo, 1833
183	MAB	Ionian Sea	Santa Maria di Leuca	39.73114575	18.347193	Porifera	Demospongiae	Suberitida	Suberitidae	Suberites	Suberites	Nardo, 1833	Suberites Nardo, 1833
184	MIB	Adriatic Sea	Tremiti	42.13825300	15.522442	Porifera	Demospongiae	Suberitida	Suberitidae	Terpios	Terpios fugax	Duchassaing & Michelotti, 1864	Terpios fugax Duchassaing & Michelotti, 1864
184	MIB	Adriatic Sea	San Foca	40.3241782	18.4662928	Porifera	Demospongiae	Suberitida	Suberitidae	Terpios	Terpios fugax	Duchassaing & Michelotti, 1864	Terpios fugax Duchassaing & Michelotti, 1864
184	MAB	Adriatic Sea	Otranto	40.12885900	18.520781	Porifera	Demospongiae	Suberitida	Suberitidae	Terpios	Terpios fugax	Duchassaing & Michelotti, 1864	Terpios fugax Duchassaing & Michelotti, 1864
184	MAB	Ionian Sea	Santa Maria di Leuca	39.73114575	18.347193	Porifera	Demospongiae	Suberitida	Suberitidae	Terpios	Terpios fugax	Duchassaing & Michelotti, 1864	Terpios fugax Duchassaing & Michelotti, 1864
185	MIB	Adriatic Sea	Otranto	40.1288590	18.520781	Porifera	Demospongiae	Suberitida	Suberitidae	Terpios	Terpios gelatinosus	(Bowerbank, 1866)	Terpios gelatinosus (Bowerbank, 1866)
185	MIB	Ionian Sea	Santa Maria di Leuca	39.73114575	18.347193	Porifera	Demospongiae	Suberitida	Suberitidae	Terpios	Terpios gelatinosus	(Bowerbank, 1866)	Terpios gelatinosus (Bowerbank, 1866)
185	MIB	Adriatic Sea	Monopoli	40.98221667	17.28620278	Porifera	Demospongiae	Suberitida	Suberitidae	Terpios	Terpios gelatinosus	(Bowerbank, 1866)	Terpios gelatinosus (Bowerbank, 1866)
185	MAB	Adriatic Sea	Monopoli	40.98221667	17.28620278	Porifera	Demospongiae	Suberitida	Suberitidae	Terpios	Terpios gelatinosus	(Bowerbank, 1866)	Terpios gelatinosus (Bowerbank, 1866)
185	MAB	Adriatic Sea	Capitolo	40.94719344	17.449318	Porifera	Demospongiae	Suberitida	Suberitidae	Terpios	Terpios gelatinosus	(Bowerbank, 1866)	Terpios gelatinosus (Bowerbank, 1866)
185	MAB	Adriatic Sea	San Foca	40.32417820	18.46629286	Porifera	Demospongiae	Suberitida	Suberitidae	Terpios	Terpios gelatinosus	(Bowerbank, 1866)	Terpios gelatinosus (Bowerbank, 1866)
186	MIB	Adriatic Sea	Capitolo	40.94719344	17.449318	Porifera	Demospongiae	Tethyida	Tethyidae	Tethya	Tethya aurantium	Pallas, 1766	Tethya aurantium Pallas, 1766
187	MIB	Adriatic Sea	Monopoli	40.98221667	17.28620278	Porifera	Demospongiae	Tethyida	Tethyidae	Tethya	Tethya citrina	Sarà & Melone, 1965	Tethya citrina Sarà & Melone, 1965
187	MAB	Adriatic Sea	Otranto	40.12885900	18.520781	Porifera	Demospongiae	Tethyida	Tethyidae	Tethya	Tethya citrina	Sarà & Melone, 1965	Tethya citrina Sarà & Melone, 1965
188	MAB	Adriatic Sea	Tremiti	42.1382530	15.52244	Porifera	Demospongiae	Tethyida	Timeidae	Timea	Timea simplistellata	Pulitzer-Finali, 1983	Timea simplistellata Pulitzer-Finali, 1983
189	MAB	Adriatic Sea	Tremiti	42.1382530	15.52244	Porifera	Demospongiae	Tethyida	Timeidae	Timea	Timea unistellata	(Topsent, 1892)	Timea unistellata (Topsent, 1892)
190	MIB	Adriatic Sea	Monopoli	40.98221667	17.28620278	Porifera	Demospongiae	Tetractinellida	Ancorinidae	Dercitus	Dercitus (Stoeba) dissimilis	(Sara, 1959)	Dercitus (Stoeba) dissimilis (Sara, 1959)
191	MIB	Adriatic Sea	Otranto	40.1288590	18.520781	Porifera	Demospongiae	Tetractinellida	Ancorinidae	Dercitus	Dercitus (Stoeba) plicatus	(Schmidt, 1868)	Dercitus (Stoeba) plicatus (Schmidt, 1868)
191	MIB	Adriatic Sea	Monopoli	40.98221667	17.28620278	Porifera	Demospongiae	Tetractinellida	Ancorinidae	Dercitus	Dercitus (Stoeba) plicatus	(Schmidt, 1868)	Dercitus (Stoeba) plicatus (Schmidt, 1868)
191	MIB	Adriatic Sea	Capitolo	40.94719344	17.449318	Porifera	Demospongiae	Tetractinellida	Ancorinidae	Dercitus	Dercitus (Stoeba) plicatus	(Schmidt, 1868)	Dercitus (Stoeba) plicatus (Schmidt, 1868)
191	MIB	Adriatic Sea	San Foca	40.3241782	18.4662928	Porifera	Demospongiae	Tetractinellida	Ancorinidae	Dercitus	Dercitus (Stoeba) plicatus	(Schmidt, 1868)	Dercitus (Stoeba) plicatus (Schmidt, 1868)
191	MAB	Adriatic Sea	Otranto	40.12885900	18.520781	Porifera	Demospongiae	Tetractinellida	Ancorinidae	Dercitus	Dercitus (Stoeba) plicatus	(Schmidt, 1868)	Dercitus (Stoeba) plicatus (Schmidt, 1868)
191	MAB	Ionian Sea	Santa Maria di Leuca	39.73114575	18.347193	Porifera	Demospongiae	Tetractinellida	Ancorinidae	Dercitus	Dercitus (Stoeba) plicatus	(Schmidt, 1868)	Dercitus (Stoeba) plicatus (Schmidt, 1868)
191	MAB	Adriatic Sea	Monopoli	40.98221667	17.28620278	Porifera	Demospongiae	Tetractinellida	Ancorinidae	Dercitus	Dercitus (Stoeba) plicatus	(Schmidt, 1868)	Dercitus (Stoeba) plicatus (Schmidt, 1868)
191	MAB	Adriatic Sea	Capitolo	40.94719344	17.449318	Porifera	Demospongiae	Tetractinellida	Ancorinidae	Dercitus	Dercitus (Stoeba) plicatus	(Schmidt, 1868)	Dercitus (Stoeba) plicatus (Schmidt, 1868)
192	MIB	Adriatic Sea	Otranto	40.1288590	18.520781	Porifera	Demospongiae	Tetractinellida	Ancorinidae	Dercitus	Dercitus	Gray, 1867	Dercitus Gray, 1867
193	MIB	Adriatic Sea	Monopoli	40.98221667	17.28620278	Porifera	Demospongiae	Tetractinellida	Ancorinidae	Holoxea	Holoxea furtiva	Topsent, 1892	Holoxea furtiva Topsent, 1892
193	MAB	Adriatic Sea	Tremiti	42.1382530	15.52244	Porifera	Demospongiae	Tetractinellida	Ancorinidae	Holoxea	Holoxea furtiva	Topsent, 1892	Holoxea furtiva Topsent, 1892
194	MIB	Adriatic Sea	Otranto	40.1288590	18.520781	Porifera	Demospongiae	Tetractinellida	Ancorinidae	Jaspis	Jaspis johnstonii	(Schmidt, 1862)	Jaspis johnstonii (Schmidt, 1862)
194	MIB	Ionian Sea	Santa Maria di Leuca	39.73114575	18.347193	Porifera	Demospongiae	Tetractinellida	Ancorinidae	Jaspis	Jaspis johnstonii	(Schmidt, 1862)	Jaspis johnstonii (Schmidt, 1862)
194	MIB	Adriatic Sea	Monopoli	40.98221667	17.28620278	Porifera	Demospongiae	Tetractinellida	Ancorinidae	Jaspis	Jaspis johnstonii	(Schmidt, 1862)	Jaspis johnstonii (Schmidt, 1862)
194	MIB	Adriatic Sea	Capitolo	40.94719344	17.449318	Porifera	Demospongiae	Tetractinellida	Ancorinidae	Jaspis	Jaspis johnstonii	(Schmidt, 1862)	Jaspis johnstonii (Schmidt, 1862)
194	MIB	Adriatic Sea	San Foca	40.3241782	18.4662928	Porifera	Demospongiae	Tetractinellida	Ancorinidae	Jaspis	Jaspis johnstonii	(Schmidt, 1862)	Jaspis johnstonii (Schmidt, 1862)
194	MAB	Adriatic Sea	Otranto	40.12885900	18.520781	Porifera	Demospongiae	Tetractinellida	Ancorinidae	Jaspis	Jaspis johnstonii	(Schmidt, 1862)	Jaspis johnstonii (Schmidt, 1862)
194	MAB	Ionian Sea	Santa Maria di Leuca	39.73114575	18.347193	Porifera	Demospongiae	Tetractinellida	Ancorinidae	Jaspis	Jaspis johnstonii	(Schmidt, 1862)	Jaspis johnstonii (Schmidt, 1862)
194	MAB	Adriatic Sea	Monopoli	40.98221667	17.28620278	Porifera	Demospongiae	Tetractinellida	Ancorinidae	Jaspis	Jaspis johnstonii	(Schmidt, 1862)	Jaspis johnstonii (Schmidt, 1862)
194	MAB	Adriatic Sea	Capitolo	40.94719344	17.449318	Porifera	Demospongiae	Tetractinellida	Ancorinidae	Jaspis	Jaspis johnstonii	(Schmidt, 1862)	Jaspis johnstonii (Schmidt, 1862)
194	MAB	Adriatic Sea	Tremiti	42.1382530	15.52244	Porifera	Demospongiae	Tetractinellida	Ancorinidae	Jaspis	Jaspis johnstonii	(Schmidt, 1862)	Jaspis johnstonii (Schmidt, 1862)
195	MIB	Adriatic Sea	Monopoli	40.98221667	17.28620278	Porifera	Demospongiae	Tetractinellida	Ancorinidae	Stelletta	Stelletta stellata	Topsent, 1893	Stelletta stellata Topsent, 1893
195	MAB	Adriatic Sea	Otranto	40.12885900	18.520781	Porifera	Demospongiae	Tetractinellida	Ancorinidae	Stelletta	Stelletta stellata	Topsent, 1893	Stelletta stellata Topsent, 1893
195	MAB	Adriatic Sea	Capitolo	40.94719344	17.449318	Porifera	Demospongiae	Tetractinellida	Ancorinidae	Stelletta	Stelletta stellata	Topsent, 1893	Stelletta stellata Topsent, 1893
196	MAB	Adriatic Sea	Capitolo	40.94719344	17.449318	Porifera	Demospongiae	Tetractinellida	Ancorinidae	Stelletta	Stelletta	Schmidt, 1862	Stelletta Schmidt, 1862
197	MIB	Adriatic Sea	Monopoli	40.98221667	17.28620278	Porifera	Demospongiae	Tetractinellida	Ancorinidae	Stryphnus	Stryphnus ponderosus	(Bowerbank, 1866)	Stryphnus ponderosus (Bowerbank, 1866)
198	MAB	Adriatic Sea	Capitolo	40.94719344	17.449318	Porifera	Demospongiae	Tetractinellida	Geodiidae	Caminella	Caminella intuta	(Topsent, 1892)	Caminella intuta (Topsent, 1892)
199	MIB	Adriatic Sea	Monopoli	40.98221667	17.28620278	Porifera	Demospongiae	Tetractinellida	Geodiidae	Erylus	Erylus discophorus	(Schmidt, 1862)	Erylus discophorus (Schmidt, 1862)
199	MIB	Adriatic Sea	Capitolo	40.94719344	17.449318	Porifera	Demospongiae	Tetractinellida	Geodiidae	Erylus	Erylus discophorus	(Schmidt, 1862)	Erylus discophorus (Schmidt, 1862)
199	MIB	Adriatic Sea	Tremiti	42.13825300	15.522442	Porifera	Demospongiae	Tetractinellida	Geodiidae	Erylus	Erylus discophorus	(Schmidt, 1862)	Erylus discophorus (Schmidt, 1862)
199	MIB	Adriatic Sea	San Foca	40.3241782	18.4662928	Porifera	Demospongiae	Tetractinellida	Geodiidae	Erylus	Erylus discophorus	(Schmidt, 1862)	Erylus discophorus (Schmidt, 1862)
199	MAB	Adriatic Sea	Otranto	40.12885900	18.520781	Porifera	Demospongiae	Tetractinellida	Geodiidae	Erylus	Erylus discophorus	(Schmidt, 1862)	Erylus discophorus (Schmidt, 1862)
199	MAB	Ionian Sea	Santa Maria di Leuca	39.73114575	18.347193	Porifera	Demospongiae	Tetractinellida	Geodiidae	Erylus	Erylus discophorus	(Schmidt, 1862)	Erylus discophorus (Schmidt, 1862)
199	MAB	Adriatic Sea	Capitolo	40.94719344	17.449318	Porifera	Demospongiae	Tetractinellida	Geodiidae	Erylus	Erylus discophorus	(Schmidt, 1862)	Erylus discophorus (Schmidt, 1862)
199	MAB	Adriatic Sea	Tremiti	42.1382530	15.52244	Porifera	Demospongiae	Tetractinellida	Geodiidae	Erylus	Erylus discophorus	(Schmidt, 1862)	Erylus discophorus (Schmidt, 1862)
200	MAB	Adriatic Sea	Tremiti	42.1382530	15.52244	Porifera	Demospongiae	Tetractinellida	Geodiidae	Erylus	Erylus mamillaris	(Schmidt, 1862)	Erylus mamillaris (Schmidt, 1862)
201	MAB	Ionian Sea	Santa Maria di Leuca	39.73114575	18.347193	Porifera	Demospongiae	Tetractinellida	Geodiidae	Erylus	Erylus papulifer	Pulitzer-Finali, 1983	Erylus papulifer Pulitzer-Finali, 1983
202	MIB	Adriatic Sea	Tremiti	42.13825300	15.522442	Porifera	Demospongiae	Tetractinellida	Geodiidae	Erylus	Erylus	Gray, 1867	Erylus Gray, 1867
203	MIB	Adriatic Sea	Otranto	40.1288590	18.520781	Porifera	Demospongiae	Tetractinellida	Geodiidae	Geodia	Geodia conchilega	Schmidt, 1862	Geodia conchilega Schmidt, 1862
203	MIB	Ionian Sea	Santa Maria di Leuca	39.73114575	18.347193	Porifera	Demospongiae	Tetractinellida	Geodiidae	Geodia	Geodia conchilega	Schmidt, 1862	Geodia conchilega Schmidt, 1862
203	MIB	Adriatic Sea	Monopoli	40.98221667	17.28620278	Porifera	Demospongiae	Tetractinellida	Geodiidae	Geodia	Geodia conchilega	Schmidt, 1862	Geodia conchilega Schmidt, 1862
203	MAB	Adriatic Sea	Otranto	40.12885900	18.520781	Porifera	Demospongiae	Tetractinellida	Geodiidae	Geodia	Geodia conchilega	Schmidt, 1862	Geodia conchilega Schmidt, 1862
204	MIB	Adriatic Sea	Tremiti	42.13825300	15.522442	Porifera	Demospongiae	Tetractinellida	Geodiidae	Geodia	Geodia cydonium	(Linnaeus, 1767)	Geodia cydonium (Linnaeus, 1767)
204	MAB	Adriatic Sea	Capitolo	40.94719344	17.449318	Porifera	Demospongiae	Tetractinellida	Geodiidae	Geodia	Geodia cydonium	(Linnaeus, 1767)	Geodia cydonium (Linnaeus, 1767)
205	MIB	Adriatic Sea	Tremiti	42.13825300	15.522442	Porifera	Demospongiae	Tetractinellida	Geodiidae	Geodia	Geodia	Lamarck, 1815	Geodia Lamarck, 1815
206	MIB	Adriatic Sea	Capitolo	40.94719344	17.449318	Porifera	Demospongiae	Tetractinellida	Geodiidae	Penares	Penares euastrum	(Schmidt, 1868)	Penares euastrum (Schmidt, 1868)
206	MIB	Adriatic Sea	Tremiti	42.13825300	15.522442	Porifera	Demospongiae	Tetractinellida	Geodiidae	Penares	Penares euastrum	(Schmidt, 1868)	Penares euastrum (Schmidt, 1868)
206	MIB	Adriatic Sea	San Foca	40.3241782	18.4662928	Porifera	Demospongiae	Tetractinellida	Geodiidae	Penares	Penares euastrum	(Schmidt, 1868)	Penares euastrum (Schmidt, 1868)
206	MAB	Adriatic Sea	Otranto	40.12885900	18.520781	Porifera	Demospongiae	Tetractinellida	Geodiidae	Penares	Penares euastrum	(Schmidt, 1868)	Penares euastrum (Schmidt, 1868)
207	MAB	Ionian Sea	Santa Maria di Leuca	39.73114575	18.347193	Porifera	Demospongiae	Tetractinellida	Geodiidae	Penares	Penares helleri	(Schmidt, 1864)	Penares helleri (Schmidt, 1864)
207	MAB	Adriatic Sea	Capitolo	40.94719344	17.449318	Porifera	Demospongiae	Tetractinellida	Geodiidae	Penares	Penares helleri	(Schmidt, 1864)	Penares helleri (Schmidt, 1864)
208	MIB	Adriatic Sea	San Foca	40.3241782	18.4662928	Porifera	Demospongiae	Tetractinellida	Pachastrellidae	Pachastrella	Pachastrella monilifera	Schmidt, 1868	Pachastrella monilifera Schmidt, 1868
208	MAB	Adriatic Sea	San Foca	40.32417820	18.46629286	Porifera	Demospongiae	Tetractinellida	Pachastrellidae	Pachastrella	Pachastrella monilifera	Schmidt, 1868	Pachastrella monilifera Schmidt, 1868
209	MIB	Adriatic Sea	Otranto	40.1288590	18.520781	Porifera	Demospongiae	Tetractinellida	Pachastrellidae	Triptolemma	Triptolemma simplex	(Sarà, 1959)	Triptolemma simplex (Sarà, 1959)
209	MIB	Adriatic Sea	Monopoli	40.98221667	17.28620278	Porifera	Demospongiae	Tetractinellida	Pachastrellidae	Triptolemma	Triptolemma simplex	(Sarà, 1959)	Triptolemma simplex (Sarà, 1959)
210	MIB	Ionian Sea	Santa Maria di Leuca	39.73114575	18.347193	Porifera	Demospongiae	Tetractinellida	Thoosidae	Delectona	Delectona ciconiae	Bavestrello, Calcinai & Sarà, 1996	Delectona ciconiae Bavestrello, Calcinai & Sarà, 1996
211	MIB	Ionian Sea	Santa Maria di Leuca	39.73114575	18.347193	Porifera	Demospongiae	Tetractinellida	Thoosidae	Thoosa	Thoosa armata	Topsent, 1888	Thoosa armata Topsent, 1888
212	MAB	Adriatic Sea	Capitolo	40.94719344	17.449318	Porifera	Demospongiae	Tetractinellida					Tetractinellida sp.
213	MIB	Adriatic Sea	Monopoli	40.98221667	17.28620278	Porifera	Demospongiae	Verongiida	Aplysinidae	Aplysina	Aplysina aerophoba	(Nardo, 1833)	Aplysina aerophoba (Nardo, 1833)
213	MAB	Adriatic Sea	Otranto	40.12885900	18.520781	Porifera	Demospongiae	Verongiida	Aplysinidae	Aplysina	Aplysina aerophoba	(Nardo, 1833)	Aplysina aerophoba (Nardo, 1833)
213	MAB	Ionian Sea	Santa Maria di Leuca	39.73114575	18.347193	Porifera	Demospongiae	Verongiida	Aplysinidae	Aplysina	Aplysina aerophoba	(Nardo, 1833)	Aplysina aerophoba (Nardo, 1833)
214	MIB	Adriatic Sea	Otranto	40.1288590	18.520781	Porifera	Demospongiae	Verongiida	Aplysinidae	Aplysina	Aplysina cavernicola	(Vacelet, 1959)	Aplysina cavernicola (Vacelet, 1959)
214	MIB	Ionian Sea	Santa Maria di Leuca	39.73114575	18.347193	Porifera	Demospongiae	Verongiida	Aplysinidae	Aplysina	Aplysina cavernicola	(Vacelet, 1959)	Aplysina cavernicola (Vacelet, 1959)
214	MIB	Adriatic Sea	Monopoli	40.98221667	17.28620278	Porifera	Demospongiae	Verongiida	Aplysinidae	Aplysina	Aplysina cavernicola	(Vacelet, 1959)	Aplysina cavernicola (Vacelet, 1959)
214	MIB	Adriatic Sea	Tremiti	42.13825300	15.522442	Porifera	Demospongiae	Verongiida	Aplysinidae	Aplysina	Aplysina cavernicola	(Vacelet, 1959)	Aplysina cavernicola (Vacelet, 1959)
214	MIB	Adriatic Sea	San Foca	40.3241782	18.4662928	Porifera	Demospongiae	Verongiida	Aplysinidae	Aplysina	Aplysina cavernicola	(Vacelet, 1959)	Aplysina cavernicola (Vacelet, 1959)
215	MIB	Ionian Sea	Santa Maria di Leuca	39.73114575	18.347193	Porifera	Demospongiae	Verongiida	Ianthellidae	Hexadella	Hexadella	Topsent, 1896	Hexadella pruvoti Topsent, 1896
216	MIB	Adriatic Sea	Otranto	40.1288590	18.520781	Porifera	Demospongiae	Verongiida	Ianthellidae	Hexadella	Hexadella racovitzai	Topsent, 1896	Hexadella racovitzai Topsent, 1896
216	MIB	Ionian Sea	Santa Maria di Leuca	39.73114575	18.347193	Porifera	Demospongiae	Verongiida	Ianthellidae	Hexadella	Hexadella racovitzai	Topsent, 1896	Hexadella racovitzai Topsent, 1896
216	MIB	Adriatic Sea	Monopoli	40.98221667	17.28620278	Porifera	Demospongiae	Verongiida	Ianthellidae	Hexadella	Hexadella racovitzai	Topsent, 1896	Hexadella racovitzai Topsent, 1896
216	MIB	Adriatic Sea	Tremiti	42.13825300	15.522442	Porifera	Demospongiae	Verongiida	Ianthellidae	Hexadella	Hexadella racovitzai	Topsent, 1896	Hexadella racovitzai Topsent, 1896
216	MAB	Adriatic Sea	Tremiti	42.1382530	15.52244	Porifera	Demospongiae	Verongiida	Ianthellidae	Hexadella	Hexadella racovitzai	Topsent, 1896	Hexadella racovitzai Topsent, 1896
217	MIB	Adriatic Sea	Otranto	40.1288590	18.520781	Porifera	Homoscleromorpha	Homosclerophorida	Oscarellidae	Oscarella	Oscarella lobularis	(Schmidt, 1862)	Oscarella lobularis (Schmidt, 1862)
217	MIB	Adriatic Sea	Monopoli	40.98221667	17.28620278	Porifera	Homoscleromorpha	Homosclerophorida	Oscarellidae	Oscarella	Oscarella lobularis	(Schmidt, 1862)	Oscarella lobularis (Schmidt, 1862)
217	MIB	Adriatic Sea	Tremiti	42.13825300	15.522442	Porifera	Homoscleromorpha	Homosclerophorida	Oscarellidae	Oscarella	Oscarella lobularis	(Schmidt, 1862)	Oscarella lobularis (Schmidt, 1862)
217	MAB	Ionian Sea	Santa Maria di Leuca	39.73114575	18.347193	Porifera	Homoscleromorpha	Homosclerophorida	Oscarellidae	Oscarella	Oscarella lobularis	(Schmidt, 1862)	Oscarella lobularis (Schmidt, 1862)
217	MAB	Adriatic Sea	Capitolo	40.94719344	17.449318	Porifera	Homoscleromorpha	Homosclerophorida	Oscarellidae	Oscarella	Oscarella lobularis	(Schmidt, 1862)	Oscarella lobularis (Schmidt, 1862)
218	MIB	Ionian Sea	Santa Maria di Leuca	39.73114575	18.347193	Porifera	Homoscleromorpha	Homosclerophorida	Plakinidae	Corticium	Corticium candelabrum	Schmidt, 1862	Corticium candelabrum Schmidt, 1862
219	MIB	Ionian Sea	Santa Maria di Leuca	39.73114575	18.347193	Porifera	Homoscleromorpha	Homosclerophorida	Plakinidae	Plakina	Plakina trilopha	Schulze, 1880	Plakina trilopha Schulze, 1880
220	MAB	Adriatic Sea	Monopoli	40.98221667	17.28620278	Porifera	Homoscleromorpha	Homosclerophorida	Plakinidae	Plakina	Plakina	Schulze, 1880	Plakina Schulze, 1880
221	MIB	Adriatic Sea	Otranto	40.1288590	18.520781	Porifera	Homoscleromorpha	Homosclerophorida	Plakinidae	Plakortis	Plakortis simplex	Schulze, 1880	Plakortis simplex Schulze, 1880
221	MIB	Ionian Sea	Santa Maria di Leuca	39.73114575	18.347193	Porifera	Homoscleromorpha	Homosclerophorida	Plakinidae	Plakortis	Plakortis simplex	Schulze, 1880	Plakortis simplex Schulze, 1880
221	MIB	Adriatic Sea	Monopoli	40.98221667	17.28620278	Porifera	Homoscleromorpha	Homosclerophorida	Plakinidae	Plakortis	Plakortis simplex	Schulze, 1880	Plakortis simplex Schulze, 1880
221	MIB	Adriatic Sea	Capitolo	40.94719344	17.449318	Porifera	Homoscleromorpha	Homosclerophorida	Plakinidae	Plakortis	Plakortis simplex	Schulze, 1880	Plakortis simplex Schulze, 1880
221	MIB	Adriatic Sea	Tremiti	42.13825300	15.522442	Porifera	Homoscleromorpha	Homosclerophorida	Plakinidae	Plakortis	Plakortis simplex	Schulze, 1880	Plakortis simplex Schulze, 1880
221	MIB	Adriatic Sea	San Foca	40.3241782	18.4662928	Porifera	Homoscleromorpha	Homosclerophorida	Plakinidae	Plakortis	Plakortis simplex	Schulze, 1880	Plakortis simplex Schulze, 1880
221	MAB	Ionian Sea	Santa Maria di Leuca	39.73114575	18.347193	Porifera	Homoscleromorpha	Homosclerophorida	Plakinidae	Plakortis	Plakortis simplex	Schulze, 1880	Plakortis simplex Schulze, 1880
221	MAB	Adriatic Sea	Monopoli	40.98221667	17.28620278	Porifera	Homoscleromorpha	Homosclerophorida	Plakinidae	Plakortis	Plakortis simplex	Schulze, 1880	Plakortis simplex Schulze, 1880
222	MAB	Adriatic Sea	Tremiti	42.1382530	15.52244	Cnidaria	Hexacorallia	Actiniaria	Actiniidae	Anemonia	Anemonia viridis	(Forsskl, 1775)	Anemonia viridis (Forsskl, 1775)
223	MAB	Adriatic Sea	Tremiti	42.1382530	15.52244	Cnidaria	Octocorallia	Malacalcyonacea	Alcyoniidae	Alcyonium	Alcyonium acaule	Marion, 1878	Alcyonium acaule Marion, 1878
224	MIB	Ionian Sea	Santa Maria di Leuca	39.73114575	18.347193	Cnidaria	Octocorallia	Malacalcyonacea	Alcyoniidae	Alcyonium	Alcyonium coralloides	(Pallas, 1766)	Alcyonium coralloides (Pallas, 1766)
225	MIB	Adriatic Sea	Otranto	40.1288590	18.520781	Cnidaria	Octocorallia	Malacalcyonacea	Eunicellidae	Eunicella	Eunicella cavolini	(Koch, 1887)	Eunicella cavolini (Koch, 1887)
225	MIB	Ionian Sea	Santa Maria di Leuca	39.73114575	18.347193	Cnidaria	Octocorallia	Malacalcyonacea	Eunicellidae	Eunicella	Eunicella cavolini	(Koch, 1887)	Eunicella cavolini (Koch, 1887)
225	MIB	Adriatic Sea	Tremiti	42.13825300	15.522442	Cnidaria	Octocorallia	Malacalcyonacea	Eunicellidae	Eunicella	Eunicella cavolini	(Koch, 1887)	Eunicella cavolini (Koch, 1887)
226	MIB	Adriatic Sea	Otranto	40.1288590	18.520781	Cnidaria	Octocorallia	Malacalcyonacea	Gorgoniidae	Leptogorgia	Leptogorgia sarmentosa	(Esper, 1791)	Leptogorgia sarmentosa (Esper, 1791)
226	MIB	Ionian Sea	Santa Maria di Leuca	39.73114575	18.347193	Cnidaria	Octocorallia	Malacalcyonacea	Gorgoniidae	Leptogorgia	Leptogorgia sarmentosa	(Esper, 1791)	Leptogorgia sarmentosa (Esper, 1791)
226	MAB	Adriatic Sea	Otranto	40.12885900	18.520781	Cnidaria	Octocorallia	Malacalcyonacea	Gorgoniidae	Leptogorgia	Leptogorgia sarmentosa	(Esper, 1791)	Leptogorgia sarmentosa (Esper, 1791)
226	MIB	Adriatic Sea	Monopoli	40.98221667	17.28620278	Cnidaria	Octocorallia	Malacalcyonacea	Gorgoniidae	Leptogorgia	Leptogorgia sarmentosa	(Esper, 1791)	Leptogorgia sarmentosa (Esper, 1791)
227	MIB	Adriatic Sea	Otranto	40.1288590	18.520781	Cnidaria	Octocorallia	Malacalcyonacea	Paramuriceidae	Paramuricea	Paramuricea clavata	(Risso, 1827)	Paramuricea clavata (Risso, 1827)
227	MIB	Ionian Sea	Santa Maria di Leuca	39.73114575	18.347193	Cnidaria	Octocorallia	Malacalcyonacea	Paramuriceidae	Paramuricea	Paramuricea clavata	(Risso, 1827)	Paramuricea clavata (Risso, 1827)
227	MIB	Adriatic Sea	Capitolo	40.94719344	17.449318	Cnidaria	Octocorallia	Malacalcyonacea	Paramuriceidae	Paramuricea	Paramuricea clavata	(Risso, 1827)	Paramuricea clavata (Risso, 1827)
227	MIB	Adriatic Sea	Tremiti	42.13825300	15.522442	Cnidaria	Octocorallia	Malacalcyonacea	Paramuriceidae	Paramuricea	Paramuricea clavata	(Risso, 1827)	Paramuricea clavata (Risso, 1827)
227	MAB	Adriatic Sea	Tremiti	42.1382530	15.52244	Cnidaria	Octocorallia	Malacalcyonacea	Paramuriceidae	Paramuricea	Paramuricea clavata	(Risso, 1827)	Paramuricea clavata (Risso, 1827)
228	MIB	Adriatic Sea	Otranto	40.1288590	18.520781	Cnidaria	Hexacorallia	Scleractinia	Caryophylliidae	Caryophyllia	Caryophyllia (Caryophyllia) inornata	(Duncan, 1878)	Caryophyllia (Caryophyllia) inornata (Duncan, 1878)
228	MIB	Ionian Sea	Santa Maria di Leuca	39.73114575	18.347193	Cnidaria	Hexacorallia	Scleractinia	Caryophylliidae	Caryophyllia	Caryophyllia (Caryophyllia) inornata	(Duncan, 1878)	Caryophyllia (Caryophyllia) inornata (Duncan, 1878)
228	MIB	Adriatic Sea	Monopoli	40.98221667	17.28620278	Cnidaria	Hexacorallia	Scleractinia	Caryophylliidae	Caryophyllia	Caryophyllia (Caryophyllia) inornata	(Duncan, 1878)	Caryophyllia (Caryophyllia) inornata (Duncan, 1878)
228	MIB	Adriatic Sea	Capitolo	40.94719344	17.449318	Cnidaria	Hexacorallia	Scleractinia	Caryophylliidae	Caryophyllia	Caryophyllia (Caryophyllia) inornata	(Duncan, 1878)	Caryophyllia (Caryophyllia) inornata (Duncan, 1878)
228	MIB	Adriatic Sea	San Foca	40.3241782	18.4662928	Cnidaria	Hexacorallia	Scleractinia	Caryophylliidae	Caryophyllia	Caryophyllia (Caryophyllia) inornata	(Duncan, 1878)	Caryophyllia (Caryophyllia) inornata (Duncan, 1878)
228	MAB	Adriatic Sea	Capitolo	40.94719344	17.449318	Cnidaria	Hexacorallia	Scleractinia	Caryophylliidae	Caryophyllia	Caryophyllia (Caryophyllia) inornata	(Duncan, 1878)	Caryophyllia (Caryophyllia) inornata (Duncan, 1878)
229	MIB	Adriatic Sea	Otranto	40.1288590	18.520781	Cnidaria	Hexacorallia	Scleractinia	Caryophylliidae	Caryophyllia	Caryophyllia (Caryophyllia) smithii	Stokes & Broderip, 1828	Caryophyllia (Caryophyllia) smithii Stokes & Broderip, 1828
229	MIB	Ionian Sea	Santa Maria di Leuca	39.73114575	18.347193	Cnidaria	Hexacorallia	Scleractinia	Caryophylliidae	Caryophyllia	Caryophyllia (Caryophyllia) smithii	Stokes & Broderip, 1828	Caryophyllia (Caryophyllia) smithii Stokes & Broderip, 1828
229	MIB	Adriatic Sea	Monopoli	40.98221667	17.28620278	Cnidaria	Hexacorallia	Scleractinia	Caryophylliidae	Caryophyllia	Caryophyllia (Caryophyllia) smithii	Stokes & Broderip, 1828	Caryophyllia (Caryophyllia) smithii Stokes & Broderip, 1828
230	MIB	Adriatic Sea	Otranto	40.1288590	18.520781	Cnidaria	Hexacorallia	Scleractinia	Caryophylliidae	Hoplangia	Hoplangia durotrix	Gosse, 1860	Hoplangia durotrix Gosse, 1860
230	MIB	Ionian Sea	Santa Maria di Leuca	39.73114575	18.347193	Cnidaria	Hexacorallia	Scleractinia	Caryophylliidae	Hoplangia	Hoplangia durotrix	Gosse, 1860	Hoplangia durotrix Gosse, 1860
230	MIB	Adriatic Sea	Monopoli	40.98221667	17.28620278	Cnidaria	Hexacorallia	Scleractinia	Caryophylliidae	Hoplangia	Hoplangia durotrix	Gosse, 1860	Hoplangia durotrix Gosse, 1860
231	MIB	Adriatic Sea	Otranto	40.1288590	18.520781	Cnidaria	Hexacorallia	Scleractinia	Caryophylliidae	Phyllangia	Phyllangia americana mouchezii	(Lacaze-Duthiers, 1897)	Phyllangia americana mouchezii (Lacaze-Duthiers, 1897)
231	MIB	Ionian Sea	Santa Maria di Leuca	39.73114575	18.347193	Cnidaria	Hexacorallia	Scleractinia	Caryophylliidae	Phyllangia	Phyllangia americana mouchezii	(Lacaze-Duthiers, 1897)	Phyllangia americana mouchezii (Lacaze-Duthiers, 1897)
231	MIB	Adriatic Sea	Monopoli	40.98221667	17.28620278	Cnidaria	Hexacorallia	Scleractinia	Caryophylliidae	Phyllangia	Phyllangia americana mouchezii	(Lacaze-Duthiers, 1897)	Phyllangia americana mouchezii (Lacaze-Duthiers, 1897)
231	MIB	Adriatic Sea	San Foca	40.3241782	18.4662928	Cnidaria	Hexacorallia	Scleractinia	Caryophylliidae	Phyllangia	Phyllangia americana mouchezii	(Lacaze-Duthiers, 1897)	Phyllangia americana mouchezii (Lacaze-Duthiers, 1897)
231	MAB	Adriatic Sea	Otranto	40.12885900	18.520781	Cnidaria	Hexacorallia	Scleractinia	Caryophylliidae	Phyllangia	Phyllangia americana mouchezii	(Lacaze-Duthiers, 1897)	Phyllangia americana mouchezii (Lacaze-Duthiers, 1897)
231	MAB	Ionian Sea	Santa Maria di Leuca	39.73114575	18.347193	Cnidaria	Hexacorallia	Scleractinia	Caryophylliidae	Phyllangia	Phyllangia americana mouchezii	(Lacaze-Duthiers, 1897)	Phyllangia americana mouchezii (Lacaze-Duthiers, 1897)
231	MAB	Adriatic Sea	Monopoli	40.98221667	17.28620278	Cnidaria	Hexacorallia	Scleractinia	Caryophylliidae	Phyllangia	Phyllangia americana mouchezii	(Lacaze-Duthiers, 1897)	Phyllangia americana mouchezii (Lacaze-Duthiers, 1897)
231	MAB	Adriatic Sea	San Foca	40.32417820	18.46629286	Cnidaria	Hexacorallia	Scleractinia	Caryophylliidae	Phyllangia	Phyllangia americana mouchezii	(Lacaze-Duthiers, 1897)	Phyllangia americana mouchezii (Lacaze-Duthiers, 1897)
232	MIB	Adriatic Sea	Otranto	40.1288590	18.520781	Cnidaria	Hexacorallia	Scleractinia	Caryophylliidae	Polycyathus	Polycyathus muellerae	(Abel, 1959)	Polycyathus muellerae (Abel, 1959)
232	MIB	Ionian Sea	Santa Maria di Leuca	39.73114575	18.347193	Cnidaria	Hexacorallia	Scleractinia	Caryophylliidae	Polycyathus	Polycyathus muellerae	(Abel, 1959)	Polycyathus muellerae (Abel, 1959)
232	MIB	Adriatic Sea	Monopoli	40.98221667	17.28620278	Cnidaria	Hexacorallia	Scleractinia	Caryophylliidae	Polycyathus	Polycyathus muellerae	(Abel, 1959)	Polycyathus muellerae (Abel, 1959)
232	MIB	Adriatic Sea	San Foca	40.3241782	18.4662928	Cnidaria	Hexacorallia	Scleractinia	Caryophylliidae	Polycyathus	Polycyathus muellerae	(Abel, 1959)	Polycyathus muellerae (Abel, 1959)
232	MAB	Adriatic Sea	Otranto	40.12885900	18.520781	Cnidaria	Hexacorallia	Scleractinia	Caryophylliidae	Polycyathus	Polycyathus muellerae	(Abel, 1959)	Polycyathus muellerae (Abel, 1959)
232	MAB	Ionian Sea	Santa Maria di Leuca	39.73114575	18.347193	Cnidaria	Hexacorallia	Scleractinia	Caryophylliidae	Polycyathus	Polycyathus muellerae	(Abel, 1959)	Polycyathus muellerae (Abel, 1959)
232	MAB	Adriatic Sea	Monopoli	40.98221667	17.28620278	Cnidaria	Hexacorallia	Scleractinia	Caryophylliidae	Polycyathus	Polycyathus muellerae	(Abel, 1959)	Polycyathus muellerae (Abel, 1959)
232	MAB	Adriatic Sea	San Foca	40.32417820	18.46629286	Cnidaria	Hexacorallia	Scleractinia	Caryophylliidae	Polycyathus	Polycyathus muellerae	(Abel, 1959)	Polycyathus muellerae (Abel, 1959)
233	MIB	Adriatic Sea	San Foca	40.3241782	18.4662928	Cnidaria	Hexacorallia	Scleractinia	Cladocoridae	Cladocora	Cladocora caespitosa	(Linnaeus, 1767)	Cladocora caespitosa (Linnaeus, 1767)
233	MAB	Adriatic Sea	Monopoli	40.98221667	17.28620278	Cnidaria	Hexacorallia	Scleractinia	Cladocoridae	Cladocora	Cladocora caespitosa	(Linnaeus, 1767)	Cladocora caespitosa (Linnaeus, 1767)
233	MAB	Adriatic Sea	Capitolo	40.94719344	17.449318	Cnidaria	Hexacorallia	Scleractinia	Cladocoridae	Cladocora	Cladocora caespitosa	(Linnaeus, 1767)	Cladocora caespitosa (Linnaeus, 1767)
234	MIB	Adriatic Sea	Otranto	40.1288590	18.520781	Cnidaria	Hexacorallia	Scleractinia	Dendrophylliidae	Cladopsammia	Cladopsammia rolandi	Lacaze-Duthiers, 1897	Cladopsammia rolandi Lacaze-Duthiers, 1897
234	MIB	Ionian Sea	Santa Maria di Leuca	39.73114575	18.347193	Cnidaria	Hexacorallia	Scleractinia	Dendrophylliidae	Cladopsammia	Cladopsammia rolandi	Lacaze-Duthiers, 1897	Cladopsammia rolandi Lacaze-Duthiers, 1897
234	MIB	Adriatic Sea	Monopoli	40.98221667	17.28620278	Cnidaria	Hexacorallia	Scleractinia	Dendrophylliidae	Cladopsammia	Cladopsammia rolandi	Lacaze-Duthiers, 1897	Cladopsammia rolandi Lacaze-Duthiers, 1897
234	MIB	Adriatic Sea	Capitolo	40.94719344	17.449318	Cnidaria	Hexacorallia	Scleractinia	Dendrophylliidae	Cladopsammia	Cladopsammia rolandi	Lacaze-Duthiers, 1897	Cladopsammia rolandi Lacaze-Duthiers, 1897
234	MIB	Adriatic Sea	Tremiti	42.13825300	15.522442	Cnidaria	Hexacorallia	Scleractinia	Dendrophylliidae	Cladopsammia	Cladopsammia rolandi	Lacaze-Duthiers, 1897	Cladopsammia rolandi Lacaze-Duthiers, 1897
234	MIB	Adriatic Sea	San Foca	40.3241782	18.4662928	Cnidaria	Hexacorallia	Scleractinia	Dendrophylliidae	Cladopsammia	Cladopsammia rolandi	Lacaze-Duthiers, 1897	Cladopsammia rolandi Lacaze-Duthiers, 1897
234	MAB	Adriatic Sea	Otranto	40.12885900	18.520781	Cnidaria	Hexacorallia	Scleractinia	Dendrophylliidae	Cladopsammia	Cladopsammia rolandi	Lacaze-Duthiers, 1897	Cladopsammia rolandi Lacaze-Duthiers, 1897
234	MAB	Ionian Sea	Santa Maria di Leuca	39.73114575	18.347193	Cnidaria	Hexacorallia	Scleractinia	Dendrophylliidae	Cladopsammia	Cladopsammia rolandi	Lacaze-Duthiers, 1897	Cladopsammia rolandi Lacaze-Duthiers, 1897
234	MAB	Adriatic Sea	San Foca	40.32417820	18.46629286	Cnidaria	Hexacorallia	Scleractinia	Dendrophylliidae	Cladopsammia	Cladopsammia rolandi	Lacaze-Duthiers, 1897	Cladopsammia rolandi Lacaze-Duthiers, 1897
235	MIB	Adriatic Sea	Otranto	40.1288590	18.520781	Cnidaria	Hexacorallia	Scleractinia	Dendrophylliidae	Leptopsammia	Leptopsammia pruvoti	Lacaze-Duthiers, 1897	Leptopsammia pruvoti Lacaze-Duthiers, 1897
235	MIB	Ionian Sea	Santa Maria di Leuca	39.73114575	18.347193	Cnidaria	Hexacorallia	Scleractinia	Dendrophylliidae	Leptopsammia	Leptopsammia pruvoti	Lacaze-Duthiers, 1897	Leptopsammia pruvoti Lacaze-Duthiers, 1897
235	MIB	Adriatic Sea	Monopoli	40.98221667	17.28620278	Cnidaria	Hexacorallia	Scleractinia	Dendrophylliidae	Leptopsammia	Leptopsammia pruvoti	Lacaze-Duthiers, 1897	Leptopsammia pruvoti Lacaze-Duthiers, 1897
235	MIB	Adriatic Sea	Capitolo	40.94719344	17.449318	Cnidaria	Hexacorallia	Scleractinia	Dendrophylliidae	Leptopsammia	Leptopsammia pruvoti	Lacaze-Duthiers, 1897	Leptopsammia pruvoti Lacaze-Duthiers, 1897
235	MIB	Adriatic Sea	Tremiti	42.13825300	15.522442	Cnidaria	Hexacorallia	Scleractinia	Dendrophylliidae	Leptopsammia	Leptopsammia pruvoti	Lacaze-Duthiers, 1897	Leptopsammia pruvoti Lacaze-Duthiers, 1897
235	MIB	Adriatic Sea	San Foca	40.3241782	18.4662928	Cnidaria	Hexacorallia	Scleractinia	Dendrophylliidae	Leptopsammia	Leptopsammia pruvoti	Lacaze-Duthiers, 1897	Leptopsammia pruvoti Lacaze-Duthiers, 1897
235	MAB	Adriatic Sea	Otranto	40.12885900	18.520781	Cnidaria	Hexacorallia	Scleractinia	Dendrophylliidae	Leptopsammia	Leptopsammia pruvoti	Lacaze-Duthiers, 1897	Leptopsammia pruvoti Lacaze-Duthiers, 1897
235	MAB	Adriatic Sea	Capitolo	40.94719344	17.449318	Cnidaria	Hexacorallia	Scleractinia	Dendrophylliidae	Leptopsammia	Leptopsammia pruvoti	Lacaze-Duthiers, 1897	Leptopsammia pruvoti Lacaze-Duthiers, 1897
235	MAB	Adriatic Sea	Tremiti	42.1382530	15.52244	Cnidaria	Hexacorallia	Scleractinia	Dendrophylliidae	Leptopsammia	Leptopsammia pruvoti	Lacaze-Duthiers, 1897	Leptopsammia pruvoti Lacaze-Duthiers, 1897
235	MAB	Adriatic Sea	San Foca	40.32417820	18.46629286	Cnidaria	Hexacorallia	Scleractinia	Dendrophylliidae	Leptopsammia	Leptopsammia pruvoti	Lacaze-Duthiers, 1897	Leptopsammia pruvoti Lacaze-Duthiers, 1897
236	MIB	Adriatic Sea	Otranto	40.1288590	18.520781	Cnidaria	Hexacorallia	Scleractinia	Flabellidae	Monomyces	Monomyces pygmaea	(Risso, 1827)	Monomyces pygmaea (Risso, 1827)
236	MIB	Ionian Sea	Santa Maria di Leuca	39.73114575	18.347193	Cnidaria	Hexacorallia	Scleractinia	Flabellidae	Monomyces	Monomyces pygmaea	(Risso, 1827)	Monomyces pygmaea (Risso, 1827)
237	MAB	Adriatic Sea	Otranto	40.12885900	18.520781	Cnidaria	Hexacorallia	Scleractinia	Pocilloporidae	Madracis	Madracis pharensis	(Heller, 1868)	Madracis pharensis (Heller, 1868)
238	MIB	Adriatic Sea	Otranto	40.1288590	18.520781	Cnidaria	Hexacorallia	Scleractinia	Stenocyathidae	Stenocyathus	Stenocyathus vermiformis	(Pourtals, 1868)	Stenocyathus vermiformis (Pourtals, 1868)
238	MIB	Ionian Sea	Santa Maria di Leuca	39.73114575	18.347193	Cnidaria	Hexacorallia	Scleractinia	Stenocyathidae	Stenocyathus	Stenocyathus vermiformis	(Pourtals, 1868)	Stenocyathus vermiformis (Pourtals, 1868)
239	MIB	Adriatic Sea	Otranto	40.1288590	18.520781	Cnidaria	Octocorallia	Scleralcyonacea	Coralliidae	Corallium	Corallium rubrum	(Linnaeus, 1758)	Corallium rubrum (Linnaeus, 1758)
239	MIB	Ionian Sea	Santa Maria di Leuca	39.73114575	18.347193	Cnidaria	Octocorallia	Scleralcyonacea	Coralliidae	Corallium	Corallium rubrum	(Linnaeus, 1758)	Corallium rubrum (Linnaeus, 1758)
239	MIB	Adriatic Sea	Tremiti	42.13825300	15.522442	Cnidaria	Octocorallia	Scleralcyonacea	Coralliidae	Corallium	Corallium rubrum	(Linnaeus, 1758)	Corallium rubrum (Linnaeus, 1758)
240	MIB	Adriatic Sea	Otranto	40.1288590	18.520781	Cnidaria	Hexacorallia	Zoantharia	Parazoanthidae	Parazoanthus	Parazoanthus axinellae	(Schmidt, 1862)	Parazoanthus axinellae (Schmidt, 1862)
240	MIB	Ionian Sea	Santa Maria di Leuca	39.73114575	18.347193	Cnidaria	Hexacorallia	Zoantharia	Parazoanthidae	Parazoanthus	Parazoanthus axinellae	(Schmidt, 1862)	Parazoanthus axinellae (Schmidt, 1862)
240	MIB	Adriatic Sea	Monopoli	40.98221667	17.28620278	Cnidaria	Hexacorallia	Zoantharia	Parazoanthidae	Parazoanthus	Parazoanthus axinellae	(Schmidt, 1862)	Parazoanthus axinellae (Schmidt, 1862)
240	MIB	Adriatic Sea	Capitolo	40.94719344	17.449318	Cnidaria	Hexacorallia	Zoantharia	Parazoanthidae	Parazoanthus	Parazoanthus axinellae	(Schmidt, 1862)	Parazoanthus axinellae (Schmidt, 1862)
240	MIB	Adriatic Sea	San Foca	40.3241782	18.4662928	Cnidaria	Hexacorallia	Zoantharia	Parazoanthidae	Parazoanthus	Parazoanthus axinellae	(Schmidt, 1862)	Parazoanthus axinellae (Schmidt, 1862)
240	MAB	Adriatic Sea	Otranto	40.12885900	18.520781	Cnidaria	Hexacorallia	Zoantharia	Parazoanthidae	Parazoanthus	Parazoanthus axinellae	(Schmidt, 1862)	Parazoanthus axinellae (Schmidt, 1862)
240	MAB	Adriatic Sea	Monopoli	40.98221667	17.28620278	Cnidaria	Hexacorallia	Zoantharia	Parazoanthidae	Parazoanthus	Parazoanthus axinellae	(Schmidt, 1862)	Parazoanthus axinellae (Schmidt, 1862)
240	MAB	Adriatic Sea	Tremiti	42.1382530	15.52244	Cnidaria	Hexacorallia	Zoantharia	Parazoanthidae	Parazoanthus	Parazoanthus axinellae	(Schmidt, 1862)	Parazoanthus axinellae (Schmidt, 1862)
241	MIB	Adriatic Sea	Monopoli	40.98221667	17.28620278	Cnidaria	Hydrozoa	Anthoathecata	Eudendriidae	Eudendrium	Eudendrium ramosum	(Linnaeus, 1758)	Eudendrium ramosum (Linnaeus, 1758)
241	MIB	Adriatic Sea	Capitolo	40.94719344	17.449318	Cnidaria	Hydrozoa	Anthoathecata	Eudendriidae	Eudendrium	Eudendrium ramosum	(Linnaeus, 1758)	Eudendrium ramosum (Linnaeus, 1758)
241	MAB	Adriatic Sea	Otranto	40.12885900	18.520781	Cnidaria	Hydrozoa	Anthoathecata	Eudendriidae	Eudendrium	Eudendrium ramosum	(Linnaeus, 1758)	Eudendrium ramosum (Linnaeus, 1758)
241	MAB	Ionian Sea	Santa Maria di Leuca	39.73114575	18.347193	Cnidaria	Hydrozoa	Anthoathecata	Eudendriidae	Eudendrium	Eudendrium ramosum	(Linnaeus, 1758)	Eudendrium ramosum (Linnaeus, 1758)
241	MAB	Adriatic Sea	Capitolo	40.94719344	17.449318	Cnidaria	Hydrozoa	Anthoathecata	Eudendriidae	Eudendrium	Eudendrium ramosum	(Linnaeus, 1758)	Eudendrium ramosum (Linnaeus, 1758)
241	MAB	Adriatic Sea	Tremiti	42.1382530	15.52244	Cnidaria	Hydrozoa	Anthoathecata	Eudendriidae	Eudendrium	Eudendrium ramosum	(Linnaeus, 1758)	Eudendrium ramosum (Linnaeus, 1758)
242	MIB	Adriatic Sea	Tremiti	42.13825300	15.522442	Cnidaria	Hydrozoa	Anthoathecata	Eudendriidae	Eudendrium	Eudendrium	Ehrenberg, 1834	Eudendrium Ehrenberg, 1834
242	MIB	Adriatic Sea	San Foca	40.3241782	18.4662928	Cnidaria	Hydrozoa	Anthoathecata	Eudendriidae	Eudendrium	Eudendrium	Ehrenberg, 1834	Eudendrium Ehrenberg, 1834
242	MAB	Adriatic Sea	Monopoli	40.98221667	17.28620278	Cnidaria	Hydrozoa	Anthoathecata	Eudendriidae	Eudendrium	Eudendrium	Ehrenberg, 1834	Eudendrium Ehrenberg, 1834
243	MAB	Ionian Sea	Santa Maria di Leuca	39.73114575	18.347193	Cnidaria	Hydrozoa	Leptothecata	Aglaopheniidae	Aglaophenia	Aglaophenia elongata	Meneghini, 1845	Aglaophenia elongata Meneghini, 1845
244	MAB	Ionian Sea	Santa Maria di Leuca	39.73114575	18.347193	Cnidaria	Hydrozoa	Leptothecata	Aglaopheniidae	Aglaophenia	Aglaophenia kirchenpaueri	(Heller, 1868)	Aglaophenia kirchenpaueri (Heller, 1868)
245	MAB	Adriatic Sea	Otranto	40.12885900	18.520781	Cnidaria	Hydrozoa	Leptothecata	Aglaopheniidae	Lytocarpia	Lytocarpia myriophyllum	(Linnaeus, 1758)	Lytocarpia myriophyllum (Linnaeus, 1758)
246	MIB	Adriatic Sea	Capitolo	40.94719344	17.449318	Cnidaria	Hydrozoa	Leptothecata	Haleciidae	Halecium	Halecium beanii	(Johnston, 1838)	Halecium beanii (Johnston, 1838)
247	MAB	Adriatic Sea	Otranto	40.12885900	18.520781	Cnidaria	Hydrozoa	Leptothecata	Hebellidae	Hebella	Hebella	Allman, 1888	Hebella
248	MIB	Adriatic Sea	Capitolo	40.94719344	17.449318	Cnidaria	Hydrozoa	Leptothecata	Sertulariidae	Salacia	Salacia desmoides	(Torrey, 1902)	Salacia desmoides (Torrey, 1902)
249	MAB	Adriatic Sea	Otranto	40.12885900	18.520781	Cnidaria	Hydrozoa	Leptothecata	Sertulariidae	Sertularella	Sertularella crassicaulis	(Heller, 1868)	Sertularella crassicaulis (Heller, 1868)
250	MIB	Adriatic Sea	Otranto	40.1288590	18.520781	Mollusca	Bivalvia	Adapedonta	Hiatellidae	Hiatella	Hiatella arctica	(Linnaeus, 1767)	Hiatella arctica (Linnaeus, 1767)
250	MIB	Ionian Sea	Santa Maria di Leuca	39.73114575	18.347193	Mollusca	Bivalvia	Adapedonta	Hiatellidae	Hiatella	Hiatella arctica	(Linnaeus, 1767)	Hiatella arctica (Linnaeus, 1767)
250	MIB	Adriatic Sea	Monopoli	40.98221667	17.28620278	Mollusca	Bivalvia	Adapedonta	Hiatellidae	Hiatella	Hiatella arctica	(Linnaeus, 1767)	Hiatella arctica (Linnaeus, 1767)
250	MIB	Adriatic Sea	Tremiti	42.13825300	15.522442	Mollusca	Bivalvia	Adapedonta	Hiatellidae	Hiatella	Hiatella arctica	(Linnaeus, 1767)	Hiatella arctica (Linnaeus, 1767)
250	MAB	Adriatic Sea	Monopoli	40.98221667	17.28620278	Mollusca	Bivalvia	Adapedonta	Hiatellidae	Hiatella	Hiatella arctica	(Linnaeus, 1767)	Hiatella arctica (Linnaeus, 1767)
250	MAB	Adriatic Sea	Tremiti	42.1382530	15.52244	Mollusca	Bivalvia	Adapedonta	Hiatellidae	Hiatella	Hiatella arctica	(Linnaeus, 1767)	Hiatella arctica (Linnaeus, 1767)
251	MIB	Ionian Sea	Santa Maria di Leuca	39.73114575	18.347193	Mollusca	Bivalvia	Adapedonta	Hiatellidae	Hiatella	Hiatella rugosa	(Linnaeus, 1767)	Hiatella rugosa (Linnaeus, 1767)
251	MIB	Adriatic Sea	Monopoli	40.98221667	17.28620278	Mollusca	Bivalvia	Adapedonta	Hiatellidae	Hiatella	Hiatella rugosa	(Linnaeus, 1767)	Hiatella rugosa (Linnaeus, 1767)
251	MAB	Adriatic Sea	Otranto	40.12885900	18.520781	Mollusca	Bivalvia	Adapedonta	Hiatellidae	Hiatella	Hiatella rugosa	(Linnaeus, 1767)	Hiatella rugosa (Linnaeus, 1767)
251	MAB	Ionian Sea	Santa Maria di Leuca	39.73114575	18.347193	Mollusca	Bivalvia	Adapedonta	Hiatellidae	Hiatella	Hiatella rugosa	(Linnaeus, 1767)	Hiatella rugosa (Linnaeus, 1767)
252	MAB	Adriatic Sea	Otranto	40.12885900	18.520781	Mollusca	Bivalvia	Arcida	Arcidae	Arca	Arca noae	Linnaeus, 1758	Arca noae Linnaeus, 1758
252	MAB	Ionian Sea	Santa Maria di Leuca	39.73114575	18.347193	Mollusca	Bivalvia	Arcida	Arcidae	Arca	Arca noae	Linnaeus, 1758	Arca noae Linnaeus, 1758
253	MIB	Adriatic Sea	Monopoli	40.98221667	17.28620278	Mollusca	Bivalvia	Arcida	Arcidae	Barbatia	Barbatia barbata	(Linnaeus, 1758)	Barbatia barbata (Linnaeus, 1758)
254	MIB	Adriatic Sea	Tremiti	42.13825300	15.522442	Mollusca	Bivalvia	Arcida	Arcidae	Tetrarca	Tetrarca tetragona	(Poli, 1795)	Tetrarca tetragona (Poli, 1795)
255	MIB	Adriatic Sea	Monopoli	40.98221667	17.28620278	Mollusca	Bivalvia	Arcida	Noetiidae	Striarca	Striarca lactea	(Linnaeus, 1758)	Striarca lactea (Linnaeus, 1758)
255	MIB	Adriatic Sea	Capitolo	40.94719344	17.449318	Mollusca	Bivalvia	Arcida	Noetiidae	Striarca	Striarca lactea	(Linnaeus, 1758)	Striarca lactea (Linnaeus, 1758)
255	MIB	Adriatic Sea	Tremiti	42.13825300	15.522442	Mollusca	Bivalvia	Arcida	Noetiidae	Striarca	Striarca lactea	(Linnaeus, 1758)	Striarca lactea (Linnaeus, 1758)
255	MIB	Adriatic Sea	San Foca	40.3241782	18.4662928	Mollusca	Bivalvia	Arcida	Noetiidae	Striarca	Striarca lactea	(Linnaeus, 1758)	Striarca lactea (Linnaeus, 1758)
255	MAB	Adriatic Sea	Otranto	40.12885900	18.520781	Mollusca	Bivalvia	Arcida	Noetiidae	Striarca	Striarca lactea	(Linnaeus, 1758)	Striarca lactea (Linnaeus, 1758)
255	MAB	Ionian Sea	Santa Maria di Leuca	39.73114575	18.347193	Mollusca	Bivalvia	Arcida	Noetiidae	Striarca	Striarca lactea	(Linnaeus, 1758)	Striarca lactea (Linnaeus, 1758)
255	MAB	Adriatic Sea	Monopoli	40.98221667	17.28620278	Mollusca	Bivalvia	Arcida	Noetiidae	Striarca	Striarca lactea	(Linnaeus, 1758)	Striarca lactea (Linnaeus, 1758)
255	MAB	Adriatic Sea	Capitolo	40.94719344	17.449318	Mollusca	Bivalvia	Arcida	Noetiidae	Striarca	Striarca lactea	(Linnaeus, 1758)	Striarca lactea (Linnaeus, 1758)
255	MAB	Adriatic Sea	Tremiti	42.1382530	15.52244	Mollusca	Bivalvia	Arcida	Noetiidae	Striarca	Striarca lactea	(Linnaeus, 1758)	Striarca lactea (Linnaeus, 1758)
255	MAB	Adriatic Sea	San Foca	40.32417820	18.46629286	Mollusca	Bivalvia	Arcida	Noetiidae	Striarca	Striarca lactea	(Linnaeus, 1758)	Striarca lactea (Linnaeus, 1758)
256	MAB	Adriatic Sea	Monopoli	40.98221667	17.28620278	Mollusca	Bivalvia	Cardiida	Cardiidae	Papillicardium	Papillicardium minimum	(Philippi, 1836)	Papillicardium minimum (Philippi, 1836)
257	MIB	Adriatic Sea	Monopoli	40.98221667	17.28620278	Mollusca	Bivalvia	Cardiida	Cardiidae	Papillicardium	Papillicardium papillosum	(Poli, 1791)	Papillicardium papillosum (Poli, 1791)
257	MAB	Adriatic Sea	Monopoli	40.98221667	17.28620278	Mollusca	Bivalvia	Cardiida	Cardiidae	Papillicardium	Papillicardium papillosum	(Poli, 1791)	Papillicardium papillosum (Poli, 1791)
258	MAB	Adriatic Sea	Monopoli	40.98221667	17.28620278	Mollusca	Bivalvia	Cardiida	Cardiidae	Parvicardium	Parvicardium carrozzai	van Aartsen & Goud, 2001	Parvicardium carrozzai van Aartsen & Goud, 2001
259	MAB	Adriatic Sea	Capitolo	40.94719344	17.449318	Mollusca	Bivalvia	Cardiida	Cardiidae	Parvicardium	Parvicardium scriptum	(Bucquoy, Dautzenberg & Dollfus, 1892)	Parvicardium scriptum (Bucquoy, Dautzenberg & Dollfus, 1892)
260	MIB	Adriatic Sea	Monopoli	40.98221667	17.28620278	Mollusca	Bivalvia	Cardiida	Semelidae	Abra	Abra alba	(W. Wood, 1802)	Abra alba (W. Wood, 1802)
261	MAB	Adriatic Sea	Monopoli	40.98221667	17.28620278	Mollusca	Bivalvia	Cardiida	Tellinidae	Macomangulus	Macomangulus tenuis	(da Costa, 1778)	Macomangulus tenuis (da Costa, 1778)
262	MAB	Ionian Sea	Santa Maria di Leuca	39.73114575	18.347193	Mollusca	Bivalvia	Carditida	Carditidae	Cardita	Cardita calyculata	(Linnaeus, 1758)	Cardita calyculata (Linnaeus, 1758)
263	MIB	Adriatic Sea	Otranto	40.1288590	18.520781	Mollusca	Bivalvia	Galeommatida	Lasaeidae	Kellia	Kellia suborbicularis	(Montagu, 1803)	Kellia suborbicularis (Montagu, 1803)
263	MIB	Ionian Sea	Santa Maria di Leuca	39.73114575	18.347193	Mollusca	Bivalvia	Galeommatida	Lasaeidae	Kellia	Kellia suborbicularis	(Montagu, 1803)	Kellia suborbicularis (Montagu, 1803)
263	MIB	Adriatic Sea	Monopoli	40.98221667	17.28620278	Mollusca	Bivalvia	Galeommatida	Lasaeidae	Kellia	Kellia suborbicularis	(Montagu, 1803)	Kellia suborbicularis (Montagu, 1803)
263	MIB	Adriatic Sea	Capitolo	40.94719344	17.449318	Mollusca	Bivalvia	Galeommatida	Lasaeidae	Kellia	Kellia suborbicularis	(Montagu, 1803)	Kellia suborbicularis (Montagu, 1803)
263	MAB	Ionian Sea	Santa Maria di Leuca	39.73114575	18.347193	Mollusca	Bivalvia	Galeommatida	Lasaeidae	Kellia	Kellia suborbicularis	(Montagu, 1803)	Kellia suborbicularis (Montagu, 1803)
263	MAB	Adriatic Sea	Monopoli	40.98221667	17.28620278	Mollusca	Bivalvia	Galeommatida	Lasaeidae	Kellia	Kellia suborbicularis	(Montagu, 1803)	Kellia suborbicularis (Montagu, 1803)
264	MIB	Adriatic Sea	Monopoli	40.98221667	17.28620278	Mollusca	Bivalvia	Gastrochaenida	Gastrochaenidae	Rocellaria	Rocellaria dubia	(Pennant, 1777)	Rocellaria dubia (Pennant, 1777)
264	MAB	Adriatic Sea	Monopoli	40.98221667	17.28620278	Mollusca	Bivalvia	Gastrochaenida	Gastrochaenidae	Rocellaria	Rocellaria dubia	(Pennant, 1777)	Rocellaria dubia (Pennant, 1777)
265	MAB	Adriatic Sea	Monopoli	40.98221667	17.28620278	Mollusca	Bivalvia	Limida	Limidae	Lima	Lima lima	(Linnaeus, 1758)	Lima lima (Linnaeus, 1758)
266	MAB	Adriatic Sea	Otranto	40.12885900	18.520781	Mollusca	Bivalvia	Limida	Limidae	Limaria	Limaria hians	(Gmelin, 1791)	Limaria hians (Gmelin, 1791)
266	MAB	Adriatic Sea	Monopoli	40.98221667	17.28620278	Mollusca	Bivalvia	Limida	Limidae	Limaria	Limaria hians	(Gmelin, 1791)	Limaria hians (Gmelin, 1791)
266	MAB	Adriatic Sea	Tremiti	42.1382530	15.52244	Mollusca	Bivalvia	Limida	Limidae	Limaria	Limaria hians	(Gmelin, 1791)	Limaria hians (Gmelin, 1791)
267	MIB	Adriatic Sea	Monopoli	40.98221667	17.28620278	Mollusca	Bivalvia	Limida	Limidae	Limaria	Limaria tuberculata	(Olivi, 1792)	Limaria tuberculata (Olivi, 1792)
268	MIB	Adriatic Sea	Monopoli	40.98221667	17.28620278	Mollusca	Bivalvia	Mytilida	Mytilidae	Crenella	Crenella arenaria	Monterosato, 1875 ex H. Martin, ms.	Crenella arenaria Monterosato, 1875 ex H. Martin, ms.
268	MAB	Adriatic Sea	Monopoli	40.98221667	17.28620278	Mollusca	Bivalvia	Mytilida	Mytilidae	Crenella	Crenella arenaria	Monterosato, 1875 ex H. Martin, ms.	Crenella arenaria Monterosato, 1875 ex H. Martin, ms.
269	MIB	Adriatic Sea	Monopoli	40.98221667	17.28620278	Mollusca	Bivalvia	Mytilida	Mytilidae	Dacrydium	Dacrydium hyalinum	(Monterosato, 1875)	Dacrydium hyalinum (Monterosato, 1875)
270	MIB	Adriatic Sea	Monopoli	40.98221667	17.28620278	Mollusca	Bivalvia	Mytilida	Mytilidae	Lithophaga	Lithophaga lithophaga	(Linnaeus, 1758)	Lithophaga lithophaga (Linnaeus, 1758)
270	MAB	Adriatic Sea	Otranto	40.12885900	18.520781	Mollusca	Bivalvia	Mytilida	Mytilidae	Lithophaga	Lithophaga lithophaga	(Linnaeus, 1758)	Lithophaga lithophaga (Linnaeus, 1758)
270	MAB	Ionian Sea	Santa Maria di Leuca	39.73114575	18.347193	Mollusca	Bivalvia	Mytilida	Mytilidae	Lithophaga	Lithophaga lithophaga	(Linnaeus, 1758)	Lithophaga lithophaga (Linnaeus, 1758)
270	MAB	Adriatic Sea	San Foca	40.32417820	18.46629286	Mollusca	Bivalvia	Mytilida	Mytilidae	Lithophaga	Lithophaga lithophaga	(Linnaeus, 1758)	Lithophaga lithophaga (Linnaeus, 1758)
271	MIB	Adriatic Sea	Monopoli	40.98221667	17.28620278	Mollusca	Bivalvia	Mytilida	Mytilidae	Modiolula	Modiolula phaseolina	(Philippi, 1844)	Modiolula phaseolina (Philippi, 1844)
271	MIB	Adriatic Sea	Tremiti	42.13825300	15.522442	Mollusca	Bivalvia	Mytilida	Mytilidae	Modiolula	Modiolula phaseolina	(Philippi, 1844)	Modiolula phaseolina (Philippi, 1844)
272	MAB	Adriatic Sea	Otranto	40.12885900	18.520781	Mollusca	Bivalvia	Mytilida	Mytilidae	Modiolus	Modiolus	Lamarck, 1799	Modiolus Lamarck, 1799
273	MIB	Adriatic Sea	Monopoli	40.98221667	17.28620278	Mollusca	Bivalvia	Mytilida	Mytilidae	Musculus	Musculus subpictus	(Cantraine, 1835)	Musculus subpictus (Cantraine, 1835)
273	MAB	Ionian Sea	Santa Maria di Leuca	39.73114575	18.347193	Mollusca	Bivalvia	Mytilida	Mytilidae	Musculus	Musculus subpictus	(Cantraine, 1835)	Musculus subpictus (Cantraine, 1835)
274	MIB	Adriatic Sea	Monopoli	40.98221667	17.28620278	Mollusca	Bivalvia	Nuculida	Nuculidae	Nucula	Nucula nucleus	(Linnaeus, 1758)	Nucula nucleus (Linnaeus, 1758)
274	MAB	Ionian Sea	Santa Maria di Leuca	39.73114575	18.347193	Mollusca	Bivalvia	Nuculida	Nuculidae	Nucula	Nucula nucleus	(Linnaeus, 1758)	Nucula nucleus (Linnaeus, 1758)
274	MAB	Adriatic Sea	Monopoli	40.98221667	17.28620278	Mollusca	Bivalvia	Nuculida	Nuculidae	Nucula	Nucula nucleus	(Linnaeus, 1758)	Nucula nucleus (Linnaeus, 1758)
275	MIB	Adriatic Sea	Otranto	40.1288590	18.520781	Mollusca	Bivalvia	Ostreida	Gryphaeidae	Neopycnodonte	Neopycnodonte cochlear	(Poli, 1795)	Neopycnodonte cochlear (Poli, 1795)
275	MIB	Ionian Sea	Santa Maria di Leuca	39.73114575	18.347193	Mollusca	Bivalvia	Ostreida	Gryphaeidae	Neopycnodonte	Neopycnodonte cochlear	(Poli, 1795)	Neopycnodonte cochlear (Poli, 1795)
275	MIB	Adriatic Sea	Monopoli	40.98221667	17.28620278	Mollusca	Bivalvia	Ostreida	Gryphaeidae	Neopycnodonte	Neopycnodonte cochlear	(Poli, 1795)	Neopycnodonte cochlear (Poli, 1795)
275	MIB	Adriatic Sea	Capitolo	40.94719344	17.449318	Mollusca	Bivalvia	Ostreida	Gryphaeidae	Neopycnodonte	Neopycnodonte cochlear	(Poli, 1795)	Neopycnodonte cochlear (Poli, 1795)
275	MIB	Adriatic Sea	Tremiti	42.13825300	15.522442	Mollusca	Bivalvia	Ostreida	Gryphaeidae	Neopycnodonte	Neopycnodonte cochlear	(Poli, 1795)	Neopycnodonte cochlear (Poli, 1795)
275	MIB	Adriatic Sea	San Foca	40.3241782	18.4662928	Mollusca	Bivalvia	Ostreida	Gryphaeidae	Neopycnodonte	Neopycnodonte cochlear	(Poli, 1795)	Neopycnodonte cochlear (Poli, 1795)
275	MAB	Ionian Sea	Santa Maria di Leuca	39.73114575	18.347193	Mollusca	Bivalvia	Ostreida	Gryphaeidae	Neopycnodonte	Neopycnodonte cochlear	(Poli, 1795)	Neopycnodonte cochlear (Poli, 1795)
276	MIB	Adriatic Sea	Monopoli	40.98221667	17.28620278	Mollusca	Bivalvia	Ostreida	Ostreidae	Ostrea	Ostrea	Linnaeus, 1758	Ostrea Linnaeus, 1758
277	MIB	Adriatic Sea	Tremiti	42.13825300	15.522442	Mollusca	Bivalvia	Pectinida	Anomiidae	Anomia	Anomia ephippium	Linnaeus, 1758	Anomia ephippium Linnaeus, 1758
278	MIB	Adriatic Sea	Monopoli	40.98221667	17.28620278	Mollusca	Bivalvia	Pectinida	Anomiidae	Pododesmus	Pododesmus patelliformis	(Linnaeus, 1761)	Pododesmus patelliformis (Linnaeus, 1761)
278	MIB	Adriatic Sea	Tremiti	42.13825300	15.522442	Mollusca	Bivalvia	Pectinida	Anomiidae	Pododesmus	Pododesmus patelliformis	(Linnaeus, 1761)	Pododesmus patelliformis (Linnaeus, 1761)
279	MAB	Ionian Sea	Santa Maria di Leuca	39.73114575	18.347193	Mollusca	Bivalvia	Pectinida	Pectinidae	Manupecten	Manupecten pesfelis	(Linnaeus, 1758)	Manupecten pesfelis (Linnaeus, 1758)
280	MAB	Adriatic Sea	Otranto	40.12885900	18.520781	Mollusca	Bivalvia	Pectinida	Pectinidae	Talochlamys	Talochlamys multistriata	(Poli, 1795)	Talochlamys multistriata (Poli, 1795)
280	MAB	Adriatic Sea	Monopoli	40.98221667	17.28620278	Mollusca	Bivalvia	Pectinida	Pectinidae	Talochlamys	Talochlamys multistriata	(Poli, 1795)	Talochlamys multistriata (Poli, 1795)
280	MAB	Adriatic Sea	Capitolo	40.94719344	17.449318	Mollusca	Bivalvia	Pectinida	Pectinidae	Talochlamys	Talochlamys multistriata	(Poli, 1795)	Talochlamys multistriata (Poli, 1795)
280	MAB	Adriatic Sea	Tremiti	42.1382530	15.52244	Mollusca	Bivalvia	Pectinida	Pectinidae	Talochlamys	Talochlamys multistriata	(Poli, 1795)	Talochlamys multistriata (Poli, 1795)
281	MAB	Adriatic Sea	Otranto	40.12885900	18.520781	Mollusca	Bivalvia	Pectinida	Spondylidae	Spondylus	Spondylus gaederopus	Linnaeus, 1758	Spondylus gaederopus Linnaeus, 1758
281	MIB	Ionian Sea	Santa Maria di Leuca	39.73114575	18.347193	Mollusca	Bivalvia	Pectinida	Spondylidae	Spondylus	Spondylus gaederopus	Linnaeus, 1758	Spondylus gaederopus Linnaeus, 1758
282	MIB	Adriatic Sea	Monopoli	40.98221667	17.28620278	Mollusca	Bivalvia	Venerida	Chamidae	Chama	Chama gryphoides	Linnaeus, 1758	Chama gryphoides Linnaeus, 1758
282	MAB	Adriatic Sea	Otranto	40.12885900	18.520781	Mollusca	Bivalvia	Venerida	Chamidae	Chama	Chama gryphoides	Linnaeus, 1758	Chama gryphoides Linnaeus, 1758
282	MAB	Ionian Sea	Santa Maria di Leuca	39.73114575	18.347193	Mollusca	Bivalvia	Venerida	Chamidae	Chama	Chama gryphoides	Linnaeus, 1758	Chama gryphoides Linnaeus, 1758
282	MAB	Adriatic Sea	San Foca	40.32417820	18.46629286	Mollusca	Bivalvia	Venerida	Chamidae	Chama	Chama gryphoides	Linnaeus, 1758	Chama gryphoides Linnaeus, 1758
283	MIB	Adriatic Sea	Monopoli	40.98221667	17.28620278	Mollusca	Bivalvia	Venerida	Chamidae	Pseudochama	Pseudochama gryphina	(Lamarck, 1819)	Pseudochama gryphina (Lamarck, 1819)
284	MIB	Adriatic Sea	Monopoli	40.98221667	17.28620278	Mollusca	Bivalvia	Venerida	Trapezidae	Coralliophaga	Coralliophaga lithophagella	(Lamarck, 1819)	Coralliophaga lithophagella (Lamarck, 1819)
285	MAB	Ionian Sea	Santa Maria di Leuca	39.73114575	18.347193	Mollusca	Bivalvia	Venerida	Veneridae	Gouldia	Gouldia minima	(Montagu, 1803)	Gouldia minima (Montagu, 1803)
286	MAB	Adriatic Sea	Otranto	40.12885900	18.520781	Mollusca	Bivalvia	Venerida	Veneridae	Lajonkairia	Lajonkairia lajonkairii	(Payraudeau, 1826)	Lajonkairia lajonkairii (Payraudeau, 1826)
287	MAB	Adriatic Sea	Monopoli	40.98221667	17.28620278	Mollusca	Bivalvia	Venerida	Veneridae	Timoclea	Timoclea ovata	(Pennant, 1777)	Timoclea ovata (Pennant, 1777)
288	MIB	Adriatic Sea	Monopoli	40.98221667	17.28620278	Mollusca	Bivalvia	Venerida	Veneridae	Venus	Venus verrucosa	Linnaeus, 1758	Venus verrucosa Linnaeus, 1758
289	MAB	Adriatic Sea	Otranto	40.12885900	18.520781	Mollusca	Cephalopoda	Myopsida	Loliginidae	Loligo	Loligo vulgaris	Lamarck, 1798	Loligo vulgaris Lamarck, 1798
289	MAB	Adriatic Sea	Monopoli	40.98221667	17.28620278	Mollusca	Cephalopoda	Myopsida	Loliginidae	Loligo	Loligo vulgaris	Lamarck, 1798	Loligo vulgaris Lamarck, 1798
289	MAB	Adriatic Sea	Capitolo	40.94719344	17.449318	Mollusca	Cephalopoda	Myopsida	Loliginidae	Loligo	Loligo vulgaris	Lamarck, 1798	Loligo vulgaris Lamarck, 1798
289	MAB	Adriatic Sea	Tremiti	42.1382530	15.52244	Mollusca	Cephalopoda	Myopsida	Loliginidae	Loligo	Loligo vulgaris	Lamarck, 1798	Loligo vulgaris Lamarck, 1798
289	MAB	Adriatic Sea	San Foca	40.32417820	18.46629286	Mollusca	Cephalopoda	Myopsida	Loliginidae	Loligo	Loligo vulgaris	Lamarck, 1798	Loligo vulgaris Lamarck, 1798
289	MAB	Ionian Sea	Santa Maria di Leuca	39.73114575	18.347193	Mollusca	Cephalopoda	Myopsida	Loliginidae	Loligo	Loligo vulgaris	Lamarck, 1798	Loligo vulgaris Lamarck, 1798
290	MAB	Adriatic Sea	Otranto	40.12885900	18.520781	Mollusca	Cephalopoda	Octopoda	Octopodidae	Octopus	Octopus vulgaris	Cuvier, 1797	Octopus vulgaris Cuvier, 1797
290	MAB	Adriatic Sea	Monopoli	40.98221667	17.28620278	Mollusca	Cephalopoda	Octopoda	Octopodidae	Octopus	Octopus vulgaris	Cuvier, 1797	Octopus vulgaris Cuvier, 1797
290	MAB	Adriatic Sea	Capitolo	40.94719344	17.449318	Mollusca	Cephalopoda	Octopoda	Octopodidae	Octopus	Octopus vulgaris	Cuvier, 1797	Octopus vulgaris Cuvier, 1797
290	MAB	Adriatic Sea	Tremiti	42.1382530	15.52244	Mollusca	Cephalopoda	Octopoda	Octopodidae	Octopus	Octopus vulgaris	Cuvier, 1797	Octopus vulgaris Cuvier, 1797
290	MAB	Adriatic Sea	San Foca	40.32417820	18.46629286	Mollusca	Cephalopoda	Octopoda	Octopodidae	Octopus	Octopus vulgaris	Cuvier, 1797	Octopus vulgaris Cuvier, 1797
290	MAB	Ionian Sea	Santa Maria di Leuca	39.73114575	18.347193	Mollusca	Cephalopoda	Octopoda	Octopodidae	Octopus	Octopus vulgaris	Cuvier, 1797	Octopus vulgaris Cuvier, 1797
291	MAB	Adriatic Sea	Otranto	40.12885900	18.520781	Mollusca	Cephalopoda	Sepiida	Sepiidae	Sepia	Sepia officinalis	Linnaeus, 1758	Sepia officinalis Linnaeus, 1758
291	MAB	Adriatic Sea	Monopoli	40.98221667	17.28620278	Mollusca	Cephalopoda	Sepiida	Sepiidae	Sepia	Sepia officinalis	Linnaeus, 1758	Sepia officinalis Linnaeus, 1758
291	MAB	Adriatic Sea	Capitolo	40.94719344	17.449318	Mollusca	Cephalopoda	Sepiida	Sepiidae	Sepia	Sepia officinalis	Linnaeus, 1758	Sepia officinalis Linnaeus, 1758
291	MAB	Adriatic Sea	Tremiti	42.1382530	15.52244	Mollusca	Cephalopoda	Sepiida	Sepiidae	Sepia	Sepia officinalis	Linnaeus, 1758	Sepia officinalis Linnaeus, 1758
291	MAB	Adriatic Sea	San Foca	40.32417820	18.46629286	Mollusca	Cephalopoda	Sepiida	Sepiidae	Sepia	Sepia officinalis	Linnaeus, 1758	Sepia officinalis Linnaeus, 1758
291	MAB	Ionian Sea	Santa Maria di Leuca	39.73114575	18.347193	Mollusca	Cephalopoda	Sepiida	Sepiidae	Sepia	Sepia officinalis	Linnaeus, 1758	Sepia officinalis Linnaeus, 1758
292	MIB	Adriatic Sea	Monopoli	40.98221667	17.28620278	Mollusca	Gastropoda	[unassigned] Caenogastropoda	Cerithiidae	Bittium	Bittium latreillii	(Payraudeau, 1826)	Bittium latreillii (Payraudeau, 1826)
292	MAB	Adriatic Sea	Otranto	40.12885900	18.520781	Mollusca	Gastropoda	[unassigned] Caenogastropoda	Cerithiidae	Bittium	Bittium latreillii	(Payraudeau, 1826)	Bittium latreillii (Payraudeau, 1826)
292	MAB	Ionian Sea	Santa Maria di Leuca	39.73114575	18.347193	Mollusca	Gastropoda	[unassigned] Caenogastropoda	Cerithiidae	Bittium	Bittium latreillii	(Payraudeau, 1826)	Bittium latreillii (Payraudeau, 1826)
292	MAB	Adriatic Sea	Monopoli	40.98221667	17.28620278	Mollusca	Gastropoda	[unassigned] Caenogastropoda	Cerithiidae	Bittium	Bittium latreillii	(Payraudeau, 1826)	Bittium latreillii (Payraudeau, 1826)
292	MAB	Adriatic Sea	Tremiti	42.1382530	15.52244	Mollusca	Gastropoda	[unassigned] Caenogastropoda	Cerithiidae	Bittium	Bittium latreillii	(Payraudeau, 1826)	Bittium latreillii (Payraudeau, 1826)
293	MIB	Adriatic Sea	Monopoli	40.98221667	17.28620278	Mollusca	Gastropoda	[unassigned] Caenogastropoda	Cerithiidae	Bittium	Bittium reticulatum	(da Costa, 1778)	Bittium reticulatum (da Costa, 1778)
293	MAB	Adriatic Sea	Monopoli	40.98221667	17.28620278	Mollusca	Gastropoda	[unassigned] Caenogastropoda	Cerithiidae	Bittium	Bittium reticulatum	(da Costa, 1778)	Bittium reticulatum (da Costa, 1778)
294	MAB	Adriatic Sea	Otranto	40.12885900	18.520781	Mollusca	Gastropoda	[unassigned] Caenogastropoda	Cerithiidae	Cerithium	Cerithium vulgatum	Bruguire, 1792	Cerithium vulgatum Bruguire, 1792
294	MAB	Ionian Sea	Santa Maria di Leuca	39.73114575	18.347193	Mollusca	Gastropoda	[unassigned] Caenogastropoda	Cerithiidae	Cerithium	Cerithium vulgatum	Bruguire, 1792	Cerithium vulgatum Bruguire, 1792
295	MAB	Adriatic Sea	Monopoli	40.98221667	17.28620278	Mollusca	Gastropoda	[unassigned] Caenogastropoda	Cerithiopsidae	Cerithiopsis	Cerithiopsis diadema	Monterosato, 1874	Cerithiopsis diadema Monterosato, 1874
296	MAB	Adriatic Sea	Monopoli	40.98221667	17.28620278	Mollusca	Gastropoda	[unassigned] Caenogastropoda	Cerithiopsidae	Cerithiopsis	Cerithiopsis scalaris	Locard, 1891	Cerithiopsis scalaris Locard, 1891
297	MIB	Adriatic Sea	Monopoli	40.98221667	17.28620278	Mollusca	Gastropoda	[unassigned] Caenogastropoda	Cerithiopsidae	Cerithiopsis	Cerithiopsis tubercularis	(Montagu, 1803)	Cerithiopsis tubercularis (Montagu, 1803)
297	MAB	Adriatic Sea	Monopoli	40.98221667	17.28620278	Mollusca	Gastropoda	[unassigned] Caenogastropoda	Cerithiopsidae	Cerithiopsis	Cerithiopsis tubercularis	(Montagu, 1803)	Cerithiopsis tubercularis (Montagu, 1803)
298	MIB	Adriatic Sea	Tremiti	42.13825300	15.522442	Mollusca	Gastropoda	[unassigned] Caenogastropoda	Planaxidae	Fossarus	Fossarus ambiguus	(Linnaeus, 1758)	Fossarus ambiguus (Linnaeus, 1758)
299	MIB	Adriatic Sea	Monopoli	40.98221667	17.28620278	Mollusca	Gastropoda	[unassigned] Caenogastropoda	Triphoridae	Marshallora	Marshallora adversa	(Montagu, 1803)	Marshallora adversa (Montagu, 1803)
299	MIB	Adriatic Sea	Capitolo	40.94719344	17.449318	Mollusca	Gastropoda	[unassigned] Caenogastropoda	Triphoridae	Marshallora	Marshallora adversa	(Montagu, 1803)	Marshallora adversa (Montagu, 1803)
299	MAB	Adriatic Sea	Monopoli	40.98221667	17.28620278	Mollusca	Gastropoda	[unassigned] Caenogastropoda	Triphoridae	Marshallora	Marshallora adversa	(Montagu, 1803)	Marshallora adversa (Montagu, 1803)
300	MAB	Adriatic Sea	Monopoli	40.98221667	17.28620278	Mollusca	Gastropoda	[unassigned] Caenogastropoda	Triphoridae	Similiphora	Similiphora similior	(Bouchet & Guillemot, 1978)	Similiphora similior (Bouchet & Guillemot, 1978)
301	MAB	Adriatic Sea	Monopoli	40.98221667	17.28620278	Mollusca	Gastropoda	[unassigned] Caenogastropoda	Turritellidae	Turritella	Turritella turbona	Monterosato, 1877	Turritella turbona Monterosato, 1877
302	MIB	Adriatic Sea	Monopoli	40.98221667	17.28620278	Mollusca	Gastropoda	[unassigned] Caenogastropoda	Turritellidae	Turritellinella	Turritellinella tricarinata	(Brocchi, 1814)	Turritellinella tricarinata (Brocchi, 1814)
303	MIB	Adriatic Sea	Monopoli	40.98221667	17.28620278	Mollusca	Gastropoda	Cephalaspidea	Haminoeidae	Weinkauffia	Weinkauffia turgidula	(Forbes, 1844)	Weinkauffia turgidula (Forbes, 1844)
304	MAB	Adriatic Sea	Monopoli	40.98221667	17.28620278	Mollusca	Gastropoda	Cephalaspidea	Retusidae	Pyrunculus	Pyrunculus hoernesi	(Weinkauff, 1866)	Pyrunculus hoernesi (Weinkauff, 1866)
305	MIB	Adriatic Sea	Capitolo	40.94719344	17.449318	Mollusca	Gastropoda	Lepetellida	Fissurellidae	Emarginula	Emarginula adriatica	O. G. Costa, 1830	Emarginula adriatica O. G. Costa, 1830
305	MAB	Adriatic Sea	Monopoli	40.98221667	17.28620278	Mollusca	Gastropoda	Lepetellida	Fissurellidae	Emarginula	Emarginula adriatica	O. G. Costa, 1830	Emarginula adriatica O. G. Costa, 1830
306	MIB	Adriatic Sea	Tremiti	42.13825300	15.522442	Mollusca	Gastropoda	Lepetellida	Fissurellidae	Emarginula	Emarginula huzardii	Payraudeau, 1826	Emarginula huzardii Payraudeau, 1826
306	MAB	Adriatic Sea	Otranto	40.12885900	18.520781	Mollusca	Gastropoda	Lepetellida	Fissurellidae	Emarginula	Emarginula huzardii	Payraudeau, 1826	Emarginula huzardii Payraudeau, 1826
306	MAB	Ionian Sea	Santa Maria di Leuca	39.73114575	18.347193	Mollusca	Gastropoda	Lepetellida	Fissurellidae	Emarginula	Emarginula huzardii	Payraudeau, 1826	Emarginula huzardii Payraudeau, 1826
306	MAB	Adriatic Sea	Tremiti	42.1382530	15.52244	Mollusca	Gastropoda	Lepetellida	Fissurellidae	Emarginula	Emarginula huzardii	Payraudeau, 1826	Emarginula huzardii Payraudeau, 1826
307	MIB	Ionian Sea	Santa Maria di Leuca	39.73114575	18.347193	Mollusca	Gastropoda	Lepetellida	Fissurellidae	Emarginula	Emarginula octaviana	Coen, 1939	Emarginula octaviana Coen, 1939
307	MIB	Adriatic Sea	Monopoli	40.98221667	17.28620278	Mollusca	Gastropoda	Lepetellida	Fissurellidae	Emarginula	Emarginula octaviana	Coen, 1939	Emarginula octaviana Coen, 1939
308	MAB	Adriatic Sea	Otranto	40.12885900	18.520781	Mollusca	Gastropoda	Lepetellida	Fissurellidae	Emarginula	Emarginula sicula	J. E. Gray, 1825	Emarginula sicula J. E. Gray, 1825
308	MAB	Adriatic Sea	Capitolo	40.94719344	17.449318	Mollusca	Gastropoda	Lepetellida	Fissurellidae	Emarginula	Emarginula sicula	J. E. Gray, 1825	Emarginula sicula J. E. Gray, 1825
309	MAB	Adriatic Sea	Monopoli	40.98221667	17.28620278	Mollusca	Gastropoda	Lepetellida	Scissurellidae	Scissurella	Scissurella costata	d'Orbigny, 1824	Scissurella costata d'Orbigny, 1824
310	MAB	Adriatic Sea	Monopoli	40.98221667	17.28620278	Mollusca	Gastropoda	Littorinimorpha	Caecidae	Caecum	Caecum auriculatum	de Folin, 1868	Caecum auriculatum de Folin, 1868
311	MIB	Adriatic Sea	Monopoli	40.98221667	17.28620278	Mollusca	Gastropoda	Littorinimorpha	Iravadiidae	Hyala	Hyala vitrea	(Montagu, 1803)	Hyala vitrea (Montagu, 1803)
312	MIB	Ionian Sea	Santa Maria di Leuca	39.73114575	18.347193	Mollusca	Gastropoda	Littorinimorpha	Ovulidae	Sandalia	Sandalia triticea	(Lamarck, 1810)	Sandalia triticea (Lamarck, 1810)
313	MAB	Adriatic Sea	Monopoli	40.98221667	17.28620278	Mollusca	Gastropoda	Littorinimorpha	Rissoidae	Alvania	Alvania cancellata	(da Costa, 1778)	Alvania cancellata (da Costa, 1778)
314	MIB	Ionian Sea	Santa Maria di Leuca	39.73114575	18.347193	Mollusca	Gastropoda	Littorinimorpha	Rissoidae	Alvania	Alvania carinata	(Da Costa, 1778)	Alvania carinata (Da Costa, 1778)
315	MAB	Adriatic Sea	Monopoli	40.98221667	17.28620278	Mollusca	Gastropoda	Littorinimorpha	Rissoidae	Alvania	Alvania cimex	(Linnaeus, 1758)	Alvania cimex (Linnaeus, 1758)
316	MAB	Adriatic Sea	Monopoli	40.98221667	17.28620278	Mollusca	Gastropoda	Littorinimorpha	Rissoidae	Alvania	Alvania hispidula	(Monterosato, 1884)	Alvania hispidula (Monterosato, 1884)
317	MIB	Adriatic Sea	San Foca	40.3241782	18.4662928	Mollusca	Gastropoda	Littorinimorpha	Rissoidae	Alvania	Alvania lineata	Risso, 1826	Alvania lineata Risso, 1826
318	MAB	Adriatic Sea	Monopoli	40.98221667	17.28620278	Mollusca	Gastropoda	Littorinimorpha	Rissoidae	Alvania	Alvania punctura	(Montagu, 1803)	Alvania punctura (Montagu, 1803)
319	MAB	Ionian Sea	Santa Maria di Leuca	39.73114575	18.347193	Mollusca	Gastropoda	Littorinimorpha	Rissoidae	Alvania	Alvania subcrenulata	(Bucquoy, Dautzenberg & Dollfus, 1884)	Alvania subcrenulata (Bucquoy, Dautzenberg & Dollfus, 1884)
320	MAB	Adriatic Sea	Monopoli	40.98221667	17.28620278	Mollusca	Gastropoda	Littorinimorpha	Rissoidae	Crisilla	Crisilla semistriata	(Montagu, 1808)	Crisilla semistriata (Montagu, 1808)
321	MIB	Adriatic Sea	Monopoli	40.98221667	17.28620278	Mollusca	Gastropoda	Littorinimorpha	Rissoidae	Pusillina	Pusillina inconspicua	(Alder, 1844	Pusillina inconspicua (Alder, 1844)
321	MAB	Adriatic Sea	Monopoli	40.98221667	17.28620278	Mollusca	Gastropoda	Littorinimorpha	Rissoidae	Pusillina	Pusillina inconspicua	(Alder, 1844	Pusillina inconspicua (Alder, 1844)
322	MAB	Adriatic Sea	Monopoli	40.98221667	17.28620278	Mollusca	Gastropoda	Littorinimorpha	Rissoidae	Pusillina	Pusillina marginata	(Michaud, 1830)	Pusillina marginata (Michaud, 1830)
323	MAB	Adriatic Sea	Monopoli	40.98221667	17.28620278	Mollusca	Gastropoda	Littorinimorpha	Rissoidae	Pusillina	Pusillina radiata	(Philippi, 1836)	Pusillina radiata (Philippi, 1836)
324	MIB	Adriatic Sea	Capitolo	40.94719344	17.449318	Mollusca	Gastropoda	Littorinimorpha	Vermetidae	Thylacodes	Thylacodes arenarius	(Linnaeus, 1758)	Thylacodes arenarius (Linnaeus, 1758)
325	MIB	Adriatic Sea	Otranto	40.1288590	18.520781	Mollusca	Gastropoda	Littorinimorpha	Vermetidae	Vermetus	Vermetus triquetrus	Bivona e Bernardi, 1832	Vermetus triquetrus Bivona e Bernardi, 1832
325	MIB	Ionian Sea	Santa Maria di Leuca	39.73114575	18.347193	Mollusca	Gastropoda	Littorinimorpha	Vermetidae	Vermetus	Vermetus triquetrus	Bivona e Bernardi, 1832	Vermetus triquetrus Bivona e Bernardi, 1832
325	MAB	Adriatic Sea	Otranto	40.12885900	18.520781	Mollusca	Gastropoda	Littorinimorpha	Vermetidae	Vermetus	Vermetus triquetrus	Bivona e Bernardi, 1832	Vermetus triquetrus Bivona e Bernardi, 1832
325	MAB	Adriatic Sea	Monopoli	40.98221667	17.28620278	Mollusca	Gastropoda	Littorinimorpha	Vermetidae	Vermetus	Vermetus triquetrus	Bivona e Bernardi, 1832	Vermetus triquetrus Bivona e Bernardi, 1832
326	MAB	Adriatic Sea	Otranto	40.12885900	18.520781	Mollusca	Gastropoda	Neogastropoda	Colubrariidae	Cumia	Cumia reticulata	(Blainville, 1829)	Cumia reticulata (Blainville, 1829)
327	MAB	Adriatic Sea	Monopoli	40.98221667	17.28620278	Mollusca	Gastropoda	Neogastropoda	Cystiscidae	Gibberula	Gibberula philippii	(Monterosato, 1878	Gibberula philippii (Monterosato, 1878)
328	MAB	Adriatic Sea	Otranto	40.12885900	18.520781	Mollusca	Gastropoda	Neogastropoda	Fasciolariidae	Pseudofusus	Pseudofusus	(Prki & Russo, 2008)	Pseudofusus buzzurroi (Prki & Russo, 2008)
328	MAB	Adriatic Sea	Monopoli	40.98221667	17.28620278	Mollusca	Gastropoda	Neogastropoda	Fasciolariidae	Pseudofusus	Pseudofusus	(Prki & Russo, 2008)	Pseudofusus buzzurroi (Prki & Russo, 2008)
328	MAB	Adriatic Sea	Capitolo	40.94719344	17.449318	Mollusca	Gastropoda	Neogastropoda	Fasciolariidae	Pseudofusus	Pseudofusus	(Prki & Russo, 2008)	Pseudofusus buzzurroi (Prki & Russo, 2008)
329	MAB	Adriatic Sea	Monopoli	40.98221667	17.28620278	Mollusca	Gastropoda	Neogastropoda	Horaiclavidae	Haedropleura	Haedropleura secalina	(Philippi, 1844)	Haedropleura secalina (Philippi, 1844)
330	MAB	Adriatic Sea	Monopoli	40.98221667	17.28620278	Mollusca	Gastropoda	Neogastropoda	Mangeliidae	Mangelia	Mangelia costata	(Pennant, 1777)	Mangelia costata (Pennant, 1777)
331	MAB	Adriatic Sea	Monopoli	40.98221667	17.28620278	Mollusca	Gastropoda	Neogastropoda	Mangeliidae	Mangelia	Mangelia stosiciana	Brusina, 1869	Mangelia stosiciana Brusina, 1869
332	MAB	Adriatic Sea	Monopoli	40.98221667	17.28620278	Mollusca	Gastropoda	Neogastropoda	Muricidae	Coralliophila	Coralliophila meyendorffii	(Calcara, 1845)	Coralliophila meyendorffii (Calcara, 1845)
333	MAB	Adriatic Sea	Monopoli	40.98221667	17.28620278	Mollusca	Gastropoda	Neogastropoda	Muricidae	Hexaplex	Hexaplex trunculus	(Linnaeus, 1758)	Hexaplex trunculus (Linnaeus, 1758)
334	MIB	Adriatic Sea	Monopoli	40.98221667	17.28620278	Mollusca	Gastropoda	Neogastropoda	Muricidae	Muricopsis	Muricopsis cristata	(Brocchi, 1814)	Muricopsis cristata (Brocchi, 1814)
334	MIB	Adriatic Sea	Capitolo	40.94719344	17.449318	Mollusca	Gastropoda	Neogastropoda	Muricidae	Muricopsis	Muricopsis cristata	(Brocchi, 1814)	Muricopsis cristata (Brocchi, 1814)
334	MAB	Adriatic Sea	Monopoli	40.98221667	17.28620278	Mollusca	Gastropoda	Neogastropoda	Muricidae	Muricopsis	Muricopsis cristata	(Brocchi, 1814)	Muricopsis cristata (Brocchi, 1814)
334	MAB	Adriatic Sea	Tremiti	42.1382530	15.52244	Mollusca	Gastropoda	Neogastropoda	Muricidae	Muricopsis	Muricopsis cristata	(Brocchi, 1814)	Muricopsis cristata (Brocchi, 1814)
334	MAB	Adriatic Sea	San Foca	40.32417820	18.46629286	Mollusca	Gastropoda	Neogastropoda	Muricidae	Muricopsis	Muricopsis cristata	(Brocchi, 1814)	Muricopsis cristata (Brocchi, 1814)
335	MAB	Adriatic Sea	Monopoli	40.98221667	17.28620278	Mollusca	Gastropoda	Neogastropoda	Muricidae	Ocinebrina	Ocinebrina corallina	(Scacchi, 1836)	Ocinebrina corallina (Scacchi, 1836)
336	MAB	Adriatic Sea	Monopoli	40.98221667	17.28620278	Mollusca	Gastropoda	Neogastropoda	Nassariidae	Tritia	Tritia incrassata	(Strom, 1768)	Tritia incrassata (Strom, 1768)
337	MAB	Adriatic Sea	Monopoli	40.98221667	17.28620278	Mollusca	Gastropoda	Neogastropoda	Pisaniidae	Enginella	Enginella leucozona	(Philippi, 1844)	Enginella leucozona (Philippi, 1844)
337	MAB	Adriatic Sea	Capitolo	40.94719344	17.449318	Mollusca	Gastropoda	Neogastropoda	Pisaniidae	Enginella	Enginella leucozona	(Philippi, 1844)	Enginella leucozona (Philippi, 1844)
338	MIB	Adriatic Sea	Monopoli	40.98221667	17.28620278	Mollusca	Gastropoda	Neogastropoda	Raphitomidae	Clathromangelia	Clathromangelia granum	(Philippi, 1844)	Clathromangelia granum (Philippi, 1844)
339	MAB	Adriatic Sea	Monopoli	40.98221667	17.28620278	Mollusca	Gastropoda	Trochida	Calliostomatidae	Calliostoma	Calliostoma conulus	(Linnaeus, 1758)	Calliostoma conulus (Linnaeus, 1758)
340	MIB	Adriatic Sea	San Foca	40.3241782	18.4662928	Mollusca	Gastropoda	Nudibranchia	Discodorididae	Peltodoris	Peltodoris atromaculata	Bergh, 1880	Peltodoris atromaculata Bergh, 1880
340	MAB	Adriatic Sea	San Foca	40.32417820	18.46629286	Mollusca	Gastropoda	Nudibranchia	Discodorididae	Peltodoris	Peltodoris atromaculata	Bergh, 1880	Peltodoris atromaculata Bergh, 1880
341	MAB	Adriatic Sea	Monopoli	40.98221667	17.28620278	Mollusca	Gastropoda	Nudibranchia	Flabellinidae	Flabellina	Flabellina affinis	(Gmelin, 1791)	Flabellina affinis (Gmelin, 1791)
342	MIB	Adriatic Sea	San Foca	40.3241782	18.4662928	Mollusca	Gastropoda	Nudibranchia	Phyllidiidae	Phyllidia	Phyllidia flava	Aradas, 1847	Phyllidia flava Aradas, 1847
343	MIB	Adriatic Sea	Monopoli	40.98221667	17.28620278	Mollusca	Gastropoda	Trochida	Trochidae	Clanculus	Clanculus corallinus	(Gmelin, 1791)	Clanculus corallinus (Gmelin, 1791)
344	MIB	Adriatic Sea	Monopoli	40.98221667	17.28620278	Mollusca	Gastropoda	Trochida	Trochidae	Clanculus	Clanculus cruciatus	(Linnaeus, 1758)	Clanculus cruciatus (Linnaeus, 1758)
345	MAB	Adriatic Sea	Monopoli	40.98221667	17.28620278	Mollusca	Gastropoda	Trochida	Trochidae	Jujubinus	Jujubinus exasperatus	(Pennant, 1777)	Jujubinus exasperatus (Pennant, 1777)
346	MIB	Adriatic Sea	Otranto	40.1288590	18.520781	Mollusca	Gastropoda	[unassigned]	Amathinidae	Carinorbis	Carinorbis clathrata	(Philippi, 1844)	Carinorbis clathrata (Philippi, 1844)
346	MIB	Ionian Sea	Santa Maria di Leuca	39.73114575	18.347193	Mollusca	Gastropoda	[unassigned]	Amathinidae	Carinorbis	Carinorbis clathrata	(Philippi, 1844)	Carinorbis clathrata (Philippi, 1844)
346	MIB	Adriatic Sea	Tremiti	42.13825300	15.522442	Mollusca	Gastropoda	[unassigned]	Amathinidae	Carinorbis	Carinorbis clathrata	(Philippi, 1844)	Carinorbis clathrata (Philippi, 1844)
347	MAB	Adriatic Sea	Monopoli	40.98221667	17.28620278	Mollusca	Gastropoda	[unassigned]	Lottiidae	Tectura	Tectura virginea	(O. F. Mller, 1776)	Tectura virginea (O. F. Mller, 1776)
348	MAB	Ionian Sea	Santa Maria di Leuca	39.73114575	18.347193	Mollusca	Gastropoda	[unassigned]	Mathildidae	Mathilda	Mathilda gemmulata	O. Semper, 1865	Mathilda gemmulata O. Semper, 1865
349	MAB	Adriatic Sea	Monopoli	40.98221667	17.28620278	Mollusca	Gastropoda	[unassigned]	Pyramidellidae	Folinella	Folinella excavata	(Phillippi, 1836)	Folinella excavata (Phillippi, 1836)
350	MAB	Adriatic Sea	Monopoli	40.98221667	17.28620278	Mollusca	Gastropoda	[unassigned]	Pyramidellidae	Folinella	Folinella ghisottii	van Aartsen, 1984	Folinella ghisottii van Aartsen, 1984
351	MAB	Adriatic Sea	Monopoli	40.98221667	17.28620278	Mollusca	Gastropoda	[unassigned]	Pyramidellidae	Megastomia	Megastomia conoidea	(Brocchi, 1814)	Megastomia conoidea (Brocchi, 1814)
352	MIB	Adriatic Sea	Monopoli	40.98221667	17.28620278	Mollusca	Gastropoda	[unassigned]	Pyramidellidae	Odostomella	Odostomella doliolum	(Philippi, 1844)	Odostomella doliolum (Philippi, 1844)
352	MAB	Adriatic Sea	Monopoli	40.98221667	17.28620278	Mollusca	Gastropoda	[unassigned]	Pyramidellidae	Odostomella	Odostomella doliolum	(Philippi, 1844)	Odostomella doliolum (Philippi, 1844)
353	MAB	Adriatic Sea	Monopoli	40.98221667	17.28620278	Mollusca	Gastropoda	[unassigned]	Pyramidellidae	Odostomia	Odostomia plicata	(Montagu, 1803)	Odostomia plicata (Montagu, 1803)
354	MIB	Adriatic Sea	Monopoli	40.98221667	17.28620278	Mollusca	Gastropoda	[unassigned]	Pyramidellidae	Odostomia	Odostomia unidentata	(Montagu, 1803)	Odostomia unidentata (Montagu, 1803)
355	MAB	Adriatic Sea	Monopoli	40.98221667	17.28620278	Mollusca	Gastropoda	[unassigned]	Pyramidellidae	Parthenina	Parthenina emaciata	(Brusina, 1866)	Parthenina emaciata (Brusina, 1866)
356	MAB	Adriatic Sea	Monopoli	40.98221667	17.28620278	Mollusca	Gastropoda	[unassigned]	Pyramidellidae	Parthenina	Parthenina interstincta	(J. Adams, 1797)	Parthenina interstincta (J. Adams, 1797)
357	MAB	Adriatic Sea	Monopoli	40.98221667	17.28620278	Mollusca	Gastropoda	[unassigned]	Pyramidellidae	Spiralina	Spiralina alpinoligustica	(Sacco, 1892)	Spiralina alpinoligustica (Sacco, 1892)
358	MIB	Adriatic Sea	Monopoli	40.98221667	17.28620278	Mollusca	Gastropoda	[unassigned]	Pyramidellidae	Turbonilla	Turbonilla pusilla	(Philippi, 1844)	Turbonilla pusilla (Philippi, 1844)
358	MAB	Adriatic Sea	Monopoli	40.98221667	17.28620278	Mollusca	Gastropoda	[unassigned]	Pyramidellidae	Turbonilla	Turbonilla pusilla	(Philippi, 1844)	Turbonilla pusilla (Philippi, 1844)
359	MAB	Adriatic Sea	Tremiti	42.1382530	15.52244	Mollusca	Polyplacophora	Chitonida	Acanthochitonidae	Acanthochitona	Acanthochitona fascicularis	(Linnaeus, 1767)	Acanthochitona fascicularis (Linnaeus, 1767)
360	MIB	Adriatic Sea	Otranto	40.1288590	18.520781	Annelida	Polychaeta	Echiuroidea	Bonelliidae	Bonellia	Bonellia viridis	Rolando, 1822	Bonellia viridis Rolando, 1822
360	MIB	Adriatic Sea	Capitolo	40.94719344	17.449318	Annelida	Polychaeta	Echiuroidea	Bonelliidae	Bonellia	Bonellia viridis	Rolando, 1822	Bonellia viridis Rolando, 1822
360	MAB	Ionian Sea	Santa Maria di Leuca	39.73114575	18.347193	Annelida	Polychaeta	Echiuroidea	Bonelliidae	Bonellia	Bonellia viridis	Rolando, 1822	Bonellia viridis Rolando, 1822
361	MIB	Adriatic Sea	Monopoli	40.98221667	17.28620278	Annelida	Polychaeta	Amphinomida	Euphrosinidae	Euphrosine	Euphrosine armadillo	Sars, 1851	Euphrosine armadillo Sars, 1851
361	MAB	Adriatic Sea	Otranto	40.12885900	18.520781	Annelida	Polychaeta	Amphinomida	Euphrosinidae	Euphrosine	Euphrosine armadillo	Sars, 1851	Euphrosine armadillo Sars, 1851
361	MAB	Ionian Sea	Santa Maria di Leuca	39.73114575	18.347193	Annelida	Polychaeta	Amphinomida	Euphrosinidae	Euphrosine	Euphrosine armadillo	Sars, 1851	Euphrosine armadillo Sars, 1851
361	MAB	Adriatic Sea	Capitolo	40.94719344	17.449318	Annelida	Polychaeta	Amphinomida	Euphrosinidae	Euphrosine	Euphrosine armadillo	Sars, 1851	Euphrosine armadillo Sars, 1851
362	MIB	Adriatic Sea	Otranto	40.1288590	18.520781	Annelida	Polychaeta	Amphinomida	Euphrosinidae	Euphrosine	Euphrosine foliosa	Audouin & H Milne Edwards, 1833	Euphrosine foliosa Audouin & H Milne Edwards, 1833
362	MIB	Ionian Sea	Santa Maria di Leuca	39.73114575	18.347193	Annelida	Polychaeta	Amphinomida	Euphrosinidae	Euphrosine	Euphrosine foliosa	Audouin & H Milne Edwards, 1833	Euphrosine foliosa Audouin & H Milne Edwards, 1833
362	MIB	Adriatic Sea	Monopoli	40.98221667	17.28620278	Annelida	Polychaeta	Amphinomida	Euphrosinidae	Euphrosine	Euphrosine foliosa	Audouin & H Milne Edwards, 1833	Euphrosine foliosa Audouin & H Milne Edwards, 1833
362	MIB	Adriatic Sea	San Foca	40.3241782	18.4662928	Annelida	Polychaeta	Amphinomida	Euphrosinidae	Euphrosine	Euphrosine foliosa	Audouin & H Milne Edwards, 1833	Euphrosine foliosa Audouin & H Milne Edwards, 1833
362	MAB	Adriatic Sea	Otranto	40.12885900	18.520781	Annelida	Polychaeta	Amphinomida	Euphrosinidae	Euphrosine	Euphrosine foliosa	Audouin & H Milne Edwards, 1833	Euphrosine foliosa Audouin & H Milne Edwards, 1833
362	MAB	Ionian Sea	Santa Maria di Leuca	39.73114575	18.347193	Annelida	Polychaeta	Amphinomida	Euphrosinidae	Euphrosine	Euphrosine foliosa	Audouin & H Milne Edwards, 1833	Euphrosine foliosa Audouin & H Milne Edwards, 1833
362	MAB	Adriatic Sea	Monopoli	40.98221667	17.28620278	Annelida	Polychaeta	Amphinomida	Euphrosinidae	Euphrosine	Euphrosine foliosa	Audouin & H Milne Edwards, 1833	Euphrosine foliosa Audouin & H Milne Edwards, 1833
362	MAB	Adriatic Sea	Tremiti	42.1382530	15.52244	Annelida	Polychaeta	Amphinomida	Euphrosinidae	Euphrosine	Euphrosine foliosa	Audouin & H Milne Edwards, 1833	Euphrosine foliosa Audouin & H Milne Edwards, 1833
362	MAB	Adriatic Sea	San Foca	40.32417820	18.46629286	Annelida	Polychaeta	Amphinomida	Euphrosinidae	Euphrosine	Euphrosine foliosa	Audouin & H Milne Edwards, 1833	Euphrosine foliosa Audouin & H Milne Edwards, 1833
363	MIB	Adriatic Sea	Monopoli	40.98221667	17.28620278	Annelida	Polychaeta	Eunicida	Dorvilleidae	Schistomeringos	Schistomeringos rudolphi	(Delle Chiaje, 1828)	Schistomeringos rudolphi (Delle Chiaje, 1828)
363	MAB	Adriatic Sea	Monopoli	40.98221667	17.28620278	Annelida	Polychaeta	Eunicida	Dorvilleidae	Schistomeringos	Schistomeringos rudolphi	(Delle Chiaje, 1828)	Schistomeringos rudolphi (Delle Chiaje, 1828)
364	MIB	Adriatic Sea	Otranto	40.1288590	18.520781	Annelida	Polychaeta	Eunicida	Eunicidae	Eunice	Eunice dubitata	Fauchald, 1974	Eunice dubitata Fauchald, 1974
364	MIB	Adriatic Sea	Monopoli	40.98221667	17.28620278	Annelida	Polychaeta	Eunicida	Eunicidae	Eunice	Eunice dubitata	Fauchald, 1974	Eunice dubitata Fauchald, 1974
364	MAB	Adriatic Sea	Otranto	40.12885900	18.520781	Annelida	Polychaeta	Eunicida	Eunicidae	Eunice	Eunice dubitata	Fauchald, 1974	Eunice dubitata Fauchald, 1974
364	MAB	Ionian Sea	Santa Maria di Leuca	39.73114575	18.347193	Annelida	Polychaeta	Eunicida	Eunicidae	Eunice	Eunice dubitata	Fauchald, 1974	Eunice dubitata Fauchald, 1974
364	MAB	Adriatic Sea	Monopoli	40.98221667	17.28620278	Annelida	Polychaeta	Eunicida	Eunicidae	Eunice	Eunice dubitata	Fauchald, 1974	Eunice dubitata Fauchald, 1974
365	MIB	Ionian Sea	Santa Maria di Leuca	39.73114575	18.347193	Annelida	Polychaeta	Eunicida	Eunicidae	Eunice	Eunice floridana	(Pourtals, 1867)	Eunice floridana (Pourtals, 1867)
365	MAB	Adriatic Sea	Otranto	40.12885900	18.520781	Annelida	Polychaeta	Eunicida	Eunicidae	Eunice	Eunice floridana	(Pourtals, 1867)	Eunice floridana (Pourtals, 1867)
365	MAB	Ionian Sea	Santa Maria di Leuca	39.73114575	18.347193	Annelida	Polychaeta	Eunicida	Eunicidae	Eunice	Eunice floridana	(Pourtals, 1867)	Eunice floridana (Pourtals, 1867)
366	MIB	Ionian Sea	Santa Maria di Leuca	39.73114575	18.347193	Annelida	Polychaeta	Eunicida	Eunicidae	Eunice	Eunice pennata	(Mller, 1776	Eunice pennata (Mller, 1776)
366	MAB	Adriatic Sea	Otranto	40.12885900	18.520781	Annelida	Polychaeta	Eunicida	Eunicidae	Eunice	Eunice pennata	(Mller, 1776	Eunice pennata (Mller, 1776)
366	MAB	Ionian Sea	Santa Maria di Leuca	39.73114575	18.347193	Annelida	Polychaeta	Eunicida	Eunicidae	Eunice	Eunice pennata	(Mller, 1776	Eunice pennata (Mller, 1776)
367	MIB	Adriatic Sea	Monopoli	40.98221667	17.28620278	Annelida	Polychaeta	Eunicida	Eunicidae	Eunice	Eunice schizobranchia	Claparède, 1870	Eunice schizobranchia Claparède, 1870
368	MAB	Adriatic Sea	Capitolo	40.94719344	17.449318	Annelida	Polychaeta	Eunicida	Eunicidae	Eunice	Eunice vittata	(Delle Chiaje, 1828)	Eunice vittata (Delle Chiaje, 1828)
368	MIB	Adriatic Sea	San Foca	40.3241782	18.4662928	Annelida	Polychaeta	Eunicida	Eunicidae	Eunice	Eunice vittata	(Delle Chiaje, 1828)	Eunice vittata (Delle Chiaje, 1828)
368	MAB	Adriatic Sea	San Foca	40.32417820	18.46629286	Annelida	Polychaeta	Eunicida	Eunicidae	Eunice	Eunice vittata	(Delle Chiaje, 1828)	Eunice vittata (Delle Chiaje, 1828)
369	MIB	Adriatic Sea	Capitolo	40.94719344	17.449318	Annelida	Polychaeta	Eunicida	Eunicidae	Eunice	Eunice	Cuvier, 1817	Eunice Cuvier, 1817
369	MIB	Adriatic Sea	Tremiti	42.13825300	15.522442	Annelida	Polychaeta	Eunicida	Eunicidae	Eunice	Eunice	Cuvier, 1817	Eunice Cuvier, 1817
369	MAB	Adriatic Sea	Tremiti	42.1382530	15.52244	Annelida	Polychaeta	Eunicida	Eunicidae	Eunice	Eunice	Cuvier, 1817	Eunice Cuvier, 1817
369	MAB	Adriatic Sea	San Foca	40.32417820	18.46629286	Annelida	Polychaeta	Eunicida	Eunicidae	Eunice	Eunice	Cuvier, 1817	Eunice Cuvier, 1817
370	MIB	Adriatic Sea	Otranto	40.1288590	18.520781	Annelida	Polychaeta	Eunicida	Eunicidae	Leodice	Leodice torquata	(Quatrefages, 1866)	Leodice torquata (Quatrefages, 1866)
370	MIB	Adriatic Sea	Monopoli	40.98221667	17.28620278	Annelida	Polychaeta	Eunicida	Eunicidae	Leodice	Leodice torquata	(Quatrefages, 1866)	Leodice torquata (Quatrefages, 1866)
370	MIB	Adriatic Sea	Capitolo	40.94719344	17.449318	Annelida	Polychaeta	Eunicida	Eunicidae	Leodice	Leodice torquata	(Quatrefages, 1866)	Leodice torquata (Quatrefages, 1866)
370	MIB	Adriatic Sea	San Foca	40.3241782	18.4662928	Annelida	Polychaeta	Eunicida	Eunicidae	Leodice	Leodice torquata	(Quatrefages, 1866)	Leodice torquata (Quatrefages, 1866)
370	MAB	Adriatic Sea	Otranto	40.12885900	18.520781	Annelida	Polychaeta	Eunicida	Eunicidae	Leodice	Leodice torquata	(Quatrefages, 1866)	Leodice torquata (Quatrefages, 1866)
370	MAB	Ionian Sea	Santa Maria di Leuca	39.73114575	18.347193	Annelida	Polychaeta	Eunicida	Eunicidae	Leodice	Leodice torquata	(Quatrefages, 1866)	Leodice torquata (Quatrefages, 1866)
370	MAB	Adriatic Sea	Monopoli	40.98221667	17.28620278	Annelida	Polychaeta	Eunicida	Eunicidae	Leodice	Leodice torquata	(Quatrefages, 1866)	Leodice torquata (Quatrefages, 1866)
370	MAB	Adriatic Sea	Capitolo	40.94719344	17.449318	Annelida	Polychaeta	Eunicida	Eunicidae	Leodice	Leodice torquata	(Quatrefages, 1866)	Leodice torquata (Quatrefages, 1866)
370	MAB	Adriatic Sea	Tremiti	42.1382530	15.52244	Annelida	Polychaeta	Eunicida	Eunicidae	Leodice	Leodice torquata	(Quatrefages, 1866)	Leodice torquata (Quatrefages, 1866)
370	MAB	Adriatic Sea	San Foca	40.32417820	18.46629286	Annelida	Polychaeta	Eunicida	Eunicidae	Leodice	Leodice torquata	(Quatrefages, 1866)	Leodice torquata (Quatrefages, 1866)
371	MIB	Adriatic Sea	Otranto	40.1288590	18.520781	Annelida	Polychaeta	Eunicida	Eunicidae	Lysidice	Lysidice collaris	Grube, 1870	Lysidice collaris Grube, 1870
371	MIB	Ionian Sea	Santa Maria di Leuca	39.73114575	18.347193	Annelida	Polychaeta	Eunicida	Eunicidae	Lysidice	Lysidice collaris	Grube, 1870	Lysidice collaris Grube, 1870
371	MIB	Adriatic Sea	Monopoli	40.98221667	17.28620278	Annelida	Polychaeta	Eunicida	Eunicidae	Lysidice	Lysidice collaris	Grube, 1870	Lysidice collaris Grube, 1870
371	MIB	Adriatic Sea	Capitolo	40.94719344	17.449318	Annelida	Polychaeta	Eunicida	Eunicidae	Lysidice	Lysidice collaris	Grube, 1870	Lysidice collaris Grube, 1870
371	MIB	Adriatic Sea	Tremiti	42.13825300	15.522442	Annelida	Polychaeta	Eunicida	Eunicidae	Lysidice	Lysidice collaris	Grube, 1870	Lysidice collaris Grube, 1870
371	MIB	Adriatic Sea	San Foca	40.3241782	18.4662928	Annelida	Polychaeta	Eunicida	Eunicidae	Lysidice	Lysidice collaris	Grube, 1870	Lysidice collaris Grube, 1870
371	MAB	Adriatic Sea	Otranto	40.12885900	18.520781	Annelida	Polychaeta	Eunicida	Eunicidae	Lysidice	Lysidice collaris	Grube, 1870	Lysidice collaris Grube, 1870
371	MAB	Adriatic Sea	Monopoli	40.98221667	17.28620278	Annelida	Polychaeta	Eunicida	Eunicidae	Lysidice	Lysidice collaris	Grube, 1870	Lysidice collaris Grube, 1870
371	MAB	Adriatic Sea	San Foca	40.32417820	18.46629286	Annelida	Polychaeta	Eunicida	Eunicidae	Lysidice	Lysidice collaris	Grube, 1870	Lysidice collaris Grube, 1870
372	MIB	Adriatic Sea	Otranto	40.1288590	18.520781	Annelida	Polychaeta	Eunicida	Eunicidae	Lysidice	Lysidice ninetta	Audouin & H Milne Edwards, 1833	Lysidice ninetta Audouin & H Milne Edwards, 1833
372	MIB	Adriatic Sea	Monopoli	40.98221667	17.28620278	Annelida	Polychaeta	Eunicida	Eunicidae	Lysidice	Lysidice ninetta	Audouin & H Milne Edwards, 1833	Lysidice ninetta Audouin & H Milne Edwards, 1833
372	MIB	Adriatic Sea	Capitolo	40.94719344	17.449318	Annelida	Polychaeta	Eunicida	Eunicidae	Lysidice	Lysidice ninetta	Audouin & H Milne Edwards, 1833	Lysidice ninetta Audouin & H Milne Edwards, 1833
372	MIB	Adriatic Sea	Tremiti	42.13825300	15.522442	Annelida	Polychaeta	Eunicida	Eunicidae	Lysidice	Lysidice ninetta	Audouin & H Milne Edwards, 1833	Lysidice ninetta Audouin & H Milne Edwards, 1833
372	MIB	Adriatic Sea	San Foca	40.3241782	18.4662928	Annelida	Polychaeta	Eunicida	Eunicidae	Lysidice	Lysidice ninetta	Audouin & H Milne Edwards, 1833	Lysidice ninetta Audouin & H Milne Edwards, 1833
372	MAB	Ionian Sea	Santa Maria di Leuca	39.73114575	18.347193	Annelida	Polychaeta	Eunicida	Eunicidae	Lysidice	Lysidice ninetta	Audouin & H Milne Edwards, 1833	Lysidice ninetta Audouin & H Milne Edwards, 1833
372	MAB	Adriatic Sea	Monopoli	40.98221667	17.28620278	Annelida	Polychaeta	Eunicida	Eunicidae	Lysidice	Lysidice ninetta	Audouin & H Milne Edwards, 1833	Lysidice ninetta Audouin & H Milne Edwards, 1833
372	MAB	Adriatic Sea	Capitolo	40.94719344	17.449318	Annelida	Polychaeta	Eunicida	Eunicidae	Lysidice	Lysidice ninetta	Audouin & H Milne Edwards, 1833	Lysidice ninetta Audouin & H Milne Edwards, 1833
372	MAB	Adriatic Sea	Tremiti	42.1382530	15.52244	Annelida	Polychaeta	Eunicida	Eunicidae	Lysidice	Lysidice ninetta	Audouin & H Milne Edwards, 1833	Lysidice ninetta Audouin & H Milne Edwards, 1833
373	MIB	Adriatic Sea	Monopoli	40.98221667	17.28620278	Annelida	Polychaeta	Eunicida	Eunicidae	Lysidice	Lysidice unicornis	(Grube, 1840)	Lysidice unicornis (Grube, 1840)
373	MIB	Adriatic Sea	Capitolo	40.94719344	17.449318	Annelida	Polychaeta	Eunicida	Eunicidae	Lysidice	Lysidice unicornis	(Grube, 1840)	Lysidice unicornis (Grube, 1840)
373	MIB	Adriatic Sea	San Foca	40.3241782	18.4662928	Annelida	Polychaeta	Eunicida	Eunicidae	Lysidice	Lysidice unicornis	(Grube, 1840)	Lysidice unicornis (Grube, 1840)
373	MAB	Adriatic Sea	Monopoli	40.98221667	17.28620278	Annelida	Polychaeta	Eunicida	Eunicidae	Lysidice	Lysidice unicornis	(Grube, 1840)	Lysidice unicornis (Grube, 1840)
373	MAB	Adriatic Sea	Capitolo	40.94719344	17.449318	Annelida	Polychaeta	Eunicida	Eunicidae	Lysidice	Lysidice unicornis	(Grube, 1840)	Lysidice unicornis (Grube, 1840)
373	MAB	Adriatic Sea	Tremiti	42.1382530	15.52244	Annelida	Polychaeta	Eunicida	Eunicidae	Lysidice	Lysidice unicornis	(Grube, 1840)	Lysidice unicornis (Grube, 1840)
373	MAB	Adriatic Sea	San Foca	40.32417820	18.46629286	Annelida	Polychaeta	Eunicida	Eunicidae	Lysidice	Lysidice unicornis	(Grube, 1840)	Lysidice unicornis (Grube, 1840)
374	MIB	Adriatic Sea	Monopoli	40.98221667	17.28620278	Annelida	Polychaeta	Eunicida	Eunicidae	Paucibranchia	Paucibranchia fallax	(Marion & Bobretzky, 1875)	Paucibranchia fallax (Marion & Bobretzky, 1875)
374	MIB	Adriatic Sea	Otranto	40.1288590	18.520781	Annelida	Polychaeta	Eunicida	Eunicidae	Paucibranchia	Paucibranchia fallax	(Marion & Bobretzky, 1875)	Paucibranchia fallax (Marion & Bobretzky, 1875)
374	MIB	Adriatic Sea	San Foca	40.3241782	18.4662928	Annelida	Polychaeta	Eunicida	Eunicidae	Paucibranchia	Paucibranchia fallax	(Marion & Bobretzky, 1875)	Paucibranchia fallax (Marion & Bobretzky, 1875)
374	MIB	Adriatic Sea	Capitolo	40.94719344	17.449318	Annelida	Polychaeta	Eunicida	Eunicidae	Paucibranchia	Paucibranchia fallax	(Marion & Bobretzky, 1875)	Paucibranchia fallax (Marion & Bobretzky, 1875)
374	MIB	Adriatic Sea	Tremiti	42.13825300	15.522442	Annelida	Polychaeta	Eunicida	Eunicidae	Paucibranchia	Paucibranchia fallax	(Marion & Bobretzky, 1875)	Paucibranchia fallax (Marion & Bobretzky, 1875)
374	MAB	Adriatic Sea	Capitolo	40.94719344	17.449318	Annelida	Polychaeta	Eunicida	Eunicidae	Paucibranchia	Paucibranchia fallax	(Marion & Bobretzky, 1875)	Paucibranchia fallax (Marion & Bobretzky, 1875)
374	MAB	Adriatic Sea	Tremiti	42.1382530	15.52244	Annelida	Polychaeta	Eunicida	Eunicidae	Paucibranchia	Paucibranchia fallax	(Marion & Bobretzky, 1875)	Paucibranchia fallax (Marion & Bobretzky, 1875)
374	MAB	Adriatic Sea	San Foca	40.32417820	18.46629286	Annelida	Polychaeta	Eunicida	Eunicidae	Paucibranchia	Paucibranchia fallax	(Marion & Bobretzky, 1875)	Paucibranchia fallax (Marion & Bobretzky, 1875)
375	MIB	Adriatic Sea	Monopoli	40.98221667	17.28620278	Annelida	Polychaeta	Eunicida	Eunicidae	Marphysa	Marphysa	Quatrefages, 1866	Marphysa Quatrefages, 1866
375	MAB	Adriatic Sea	Monopoli	40.98221667	17.28620278	Annelida	Polychaeta	Eunicida	Eunicidae	Marphysa	Marphysa	Quatrefages, 1866	Marphysa Quatrefages, 1866
376	MAB	Adriatic Sea	Monopoli	40.98221667	17.28620278	Annelida	Polychaeta	Eunicida	Eunicidae	Palola	Palola dubia	(Woodworth, 1907)	Palola dubia (Woodworth, 1907)
377	MIB	Adriatic Sea	Otranto	40.1288590	18.520781	Annelida	Polychaeta	Eunicida	Eunicidae	Palola	Palola siciliensis	(Grube, 1840)	Palola siciliensis (Grube, 1840)
377	MIB	Adriatic Sea	Monopoli	40.98221667	17.28620278	Annelida	Polychaeta	Eunicida	Eunicidae	Palola	Palola siciliensis	(Grube, 1840)	Palola siciliensis (Grube, 1840)
377	MIB	Adriatic Sea	Capitolo	40.94719344	17.449318	Annelida	Polychaeta	Eunicida	Eunicidae	Palola	Palola siciliensis	(Grube, 1840)	Palola siciliensis (Grube, 1840)
377	MIB	Adriatic Sea	Tremiti	42.13825300	15.522442	Annelida	Polychaeta	Eunicida	Eunicidae	Palola	Palola siciliensis	(Grube, 1840)	Palola siciliensis (Grube, 1840)
377	MAB	Adriatic Sea	Capitolo	40.94719344	17.449318	Annelida	Polychaeta	Eunicida	Eunicidae	Palola	Palola siciliensis	(Grube, 1840)	Palola siciliensis (Grube, 1840)
378	MIB	Adriatic Sea	Otranto	40.1288590	18.520781	Annelida	Polychaeta	Eunicida	Eunicidae	Palola	Palola valida	(Gravier, 1900)	Palola valida (Gravier, 1900)
378	MAB	Adriatic Sea	Monopoli	40.98221667	17.28620278	Annelida	Polychaeta	Eunicida	Eunicidae	Palola	Palola valida	(Gravier, 1900)	Palola valida (Gravier, 1900)
378	MAB	Adriatic Sea	Otranto	40.12885900	18.520781	Annelida	Polychaeta	Eunicida	Eunicidae	Palola	Palola valida	(Gravier, 1900)	Palola valida (Gravier, 1900)
378	MAB	Ionian Sea	Santa Maria di Leuca	39.73114575	18.347193	Annelida	Polychaeta	Eunicida	Eunicidae	Palola	Palola valida	(Gravier, 1900)	Palola valida (Gravier, 1900)
379	MIB	Adriatic Sea	Capitolo	40.94719344	17.449318	Annelida	Polychaeta	Eunicida	Eunicidae	Paucibranchia	Paucibranchia fallax	(Marion & Bobretzky, 1875)	Paucibranchia fallax (Marion & Bobretzky, 1875)
379	MIB	Adriatic Sea	San Foca	40.3241782	18.4662928	Annelida	Polychaeta	Eunicida	Eunicidae	Paucibranchia	Paucibranchia fallax	(Marion & Bobretzky, 1875)	Paucibranchia fallax (Marion & Bobretzky, 1875)
379	MAB	Adriatic Sea	San Foca	40.32417820	18.46629286	Annelida	Polychaeta	Eunicida	Eunicidae	Paucibranchia	Paucibranchia fallax	(Marion & Bobretzky, 1875)	Paucibranchia fallax (Marion & Bobretzky, 1875)
380	MIB	Adriatic Sea	Monopoli	40.98221667	17.28620278	Annelida	Polychaeta	Eunicida	Lumbrineridae	Scoletoma	Scoletoma laurentiana	(Grube, 1863)	Scoletoma laurentiana (Grube, 1863)
381	MIB	Adriatic Sea	Otranto	40.1288590	18.520781	Annelida	Polychaeta	Eunicida	Oenonidae	Arabella	Arabella geniculata	(Claparde, 1868)	Arabella geniculata (Claparde, 1868)
381	MIB	Adriatic Sea	Monopoli	40.98221667	17.28620278	Annelida	Polychaeta	Eunicida	Oenonidae	Arabella	Arabella geniculata	(Claparde, 1868)	Arabella geniculata (Claparde, 1868)
381	MIB	Adriatic Sea	Capitolo	40.94719344	17.449318	Annelida	Polychaeta	Eunicida	Oenonidae	Arabella	Arabella geniculata	(Claparde, 1868)	Arabella geniculata (Claparde, 1868)
382	MIB	Adriatic Sea	Monopoli	40.98221667	17.28620278	Annelida	Polychaeta	Eunicida	Oenonidae	Arabella	Arabella iricolor	(Montagu, 1804)	Arabella iricolor (Montagu, 1804)
383	MIB	Adriatic Sea	Otranto	40.1288590	18.520781	Annelida	Polychaeta	Eunicida	Oenonidae	Drilonereis	Drilonereis filum	(Claparède, 1868)	Drilonereis filum (Claparède, 1868)
383	MIB	Adriatic Sea	Monopoli	40.98221667	17.28620278	Annelida	Polychaeta	Eunicida	Oenonidae	Drilonereis	Drilonereis filum	(Claparède, 1868)	Drilonereis filum (Claparède, 1868)
384	MIB	Adriatic Sea	Tremiti	42.13825300	15.522442	Annelida	Polychaeta	Eunicida	Onuphidae	Nothria	Nothria conchylega	(Sars, 1835)	Nothria conchylega (Sars, 1835)
385	MIB	Adriatic Sea	Monopoli	40.98221667	17.28620278	Annelida	Polychaeta	Phyllodocida	Aphroditidae	Pontogenia	Pontogenia chrysocoma	(Baird, 1865)	Pontogenia chrysocoma (Baird, 1865)
385	MAB	Adriatic Sea	Monopoli	40.98221667	17.28620278	Annelida	Polychaeta	Phyllodocida	Aphroditidae	Pontogenia	Pontogenia chrysocoma	(Baird, 1865)	Pontogenia chrysocoma (Baird, 1865)
386	MAB	Adriatic Sea	San Foca	40.32417820	18.46629286	Annelida	Polychaeta	Phyllodocida	Aphroditidae	Laetmonice	Laetmonice hystrix	(Savigny in Lamarck, 1818)	Laetmonice hystrix (Savigny in Lamarck, 1818)
387	MAB	Adriatic Sea	San Foca	40.32417820	18.46629286	Annelida	Polychaeta	Phyllodocida	Chrysopetalidae	Chrysopetalum	Chrysopetalum debile	(Grube, 1855)	Chrysopetalum debile (Grube, 1855)
388	MIB	Adriatic Sea	Monopoli	40.98221667	17.28620278	Annelida	Polychaeta	Phyllodocida	Glyceridae	Glycera	Glycera tesselata	Grube, 1863	Glycera tesselata Grube, 1863
388	MIB	Adriatic Sea	Capitolo	40.94719344	17.449318	Annelida	Polychaeta	Phyllodocida	Glyceridae	Glycera	Glycera tesselata	Grube, 1863	Glycera tesselata Grube, 1863
388	MIB	Adriatic Sea	Tremiti	42.13825300	15.522442	Annelida	Polychaeta	Phyllodocida	Glyceridae	Glycera	Glycera tesselata	Grube, 1863	Glycera tesselata Grube, 1863
388	MIB	Adriatic Sea	San Foca	40.3241782	18.4662928	Annelida	Polychaeta	Phyllodocida	Glyceridae	Glycera	Glycera tesselata	Grube, 1863	Glycera tesselata Grube, 1863
388	MAB	Adriatic Sea	San Foca	40.32417820	18.46629286	Annelida	Polychaeta	Phyllodocida	Glyceridae	Glycera	Glycera tesselata	Grube, 1863	Glycera tesselata Grube, 1863
388	MAB	Adriatic Sea	Monopoli	40.98221667	17.28620278	Annelida	Polychaeta	Phyllodocida	Glyceridae	Glycera	Glycera tesselata	Grube, 1863	Glycera tesselata Grube, 1863
389	MIB	Adriatic Sea	Monopoli	40.98221667	17.28620278	Annelida	Polychaeta	Phyllodocida	Glyceridae	Glycera	Glycera unicornis	Lamarck, 1818	Glycera unicornis Lamarck, 1818
389	MIB	Adriatic Sea	Capitolo	40.94719344	17.449318	Annelida	Polychaeta	Phyllodocida	Glyceridae	Glycera	Glycera unicornis	Lamarck, 1818	Glycera unicornis Lamarck, 1818
390	MIB	Adriatic Sea	Monopoli	40.98221667	17.28620278	Annelida	Polychaeta	Phyllodocida	Goniadidae	Glycinde	Glycinde nordmanni	(Malmgren, 1866)	Glycinde nordmanni (Malmgren, 1866)
390	MIB	Adriatic Sea	Capitolo	40.94719344	17.449318	Annelida	Polychaeta	Phyllodocida	Goniadidae	Glycinde	Glycinde nordmanni	(Malmgren, 1866)	Glycinde nordmanni (Malmgren, 1866)
391	MIB	Adriatic Sea	Capitolo	40.94719344	17.449318	Annelida	Polychaeta	Phyllodocida	Goniadidae	Goniada	Goniada emerita	Audouin & H Milne Edwards, 1833	Goniada emerita Audouin & H Milne Edwards, 1833
391	MIB	Adriatic Sea	Monopoli	40.98221667	17.28620278	Annelida	Polychaeta	Phyllodocida	Goniadidae	Goniada	Goniada emerita	Audouin & H Milne Edwards, 1833	Goniada emerita Audouin & H Milne Edwards, 1833
391	MAB	Adriatic Sea	San Foca	40.32417820	18.46629286	Annelida	Polychaeta	Phyllodocida	Goniadidae	Goniada	Goniada emerita	Audouin & H Milne Edwards, 1833	Goniada emerita Audouin & H Milne Edwards, 1833
391	MAB	Adriatic Sea	Otranto	40.12885900	18.520781	Annelida	Polychaeta	Phyllodocida	Goniadidae	Goniada	Goniada emerita	Audouin & H Milne Edwards, 1833	Goniada emerita Audouin & H Milne Edwards, 1833
392	MIB	Adriatic Sea	Monopoli	40.98221667	17.28620278	Annelida	Polychaeta	Phyllodocida	Goniadidae	Goniada	Goniada maculata	Orsted, 1843	Goniada maculata Orsted, 1843
392	MIB	Adriatic Sea	Capitolo	40.94719344	17.449318	Annelida	Polychaeta	Phyllodocida	Goniadidae	Goniada	Goniada maculata	Orsted, 1843	Goniada maculata Orsted, 1843
392	MIB	Adriatic Sea	Otranto	40.1288590	18.520781	Annelida	Polychaeta	Phyllodocida	Goniadidae	Goniada	Goniada maculata	Orsted, 1843	Goniada maculata Orsted, 1843
392	MAB	Ionian Sea	Santa Maria di Leuca	39.73114575	18.347193	Annelida	Polychaeta	Phyllodocida	Goniadidae	Goniada	Goniada maculata	Orsted, 1843	Goniada maculata Orsted, 1843
392	MAB	Adriatic Sea	Monopoli	40.98221667	17.28620278	Annelida	Polychaeta	Phyllodocida	Goniadidae	Goniada	Goniada maculata	Orsted, 1843	Goniada maculata Orsted, 1843
393	MIB	Adriatic Sea	Monopoli	40.98221667	17.28620278	Annelida	Polychaeta	Phyllodocida	Hesionidae	Psamathe	Psamathe fusca	Johnston, 1836	Psamathe fusca Johnston, 1836
393	MAB	Adriatic Sea	Monopoli	40.98221667	17.28620278	Annelida	Polychaeta	Phyllodocida	Hesionidae	Psamathe	Psamathe fusca	Johnston, 1836	Psamathe fusca Johnston, 1836
394	MAB	Adriatic Sea	Monopoli	40.98221667	17.28620278	Annelida	Polychaeta	Phyllodocida	Hesionidae	Leocrates	Leocrates claparedii	(Costa in Claparde, 1868)	Leocrates claparedii (Costa in Claparde, 1868)
395	MIB	Adriatic Sea	Capitolo	40.94719344	17.449318	Annelida	Polychaeta	Phyllodocida	Nereididae	Composetia	Composetia costae	(Grube, 1840)	Composetia costae (Grube, 1840)
395	MIB	Adriatic Sea	Monopoli	40.98221667	17.28620278	Annelida	Polychaeta	Phyllodocida	Nereididae	Composetia	Composetia costae	(Grube, 1840)	Composetia costae (Grube, 1840)
395	MIB	Adriatic Sea	Otranto	40.1288590	18.520781	Annelida	Polychaeta	Phyllodocida	Nereididae	Composetia	Composetia costae	(Grube, 1840)	Composetia costae (Grube, 1840)
395	MIB	Adriatic Sea	Tremiti	42.13825300	15.522442	Annelida	Polychaeta	Phyllodocida	Nereididae	Composetia	Composetia costae	(Grube, 1840)	Composetia costae (Grube, 1840)
395	MIB	Adriatic Sea	San Foca	40.3241782	18.4662928	Annelida	Polychaeta	Phyllodocida	Nereididae	Composetia	Composetia costae	(Grube, 1840)	Composetia costae (Grube, 1840)
395	MAB	Adriatic Sea	Monopoli	40.98221667	17.28620278	Annelida	Polychaeta	Phyllodocida	Nereididae	Composetia	Composetia costae	(Grube, 1840)	Composetia costae (Grube, 1840)
395	MAB	Adriatic Sea	San Foca	40.32417820	18.46629286	Annelida	Polychaeta	Phyllodocida	Nereididae	Composetia	Composetia costae	(Grube, 1840)	Composetia costae (Grube, 1840)
396	MIB	Adriatic Sea	Monopoli	40.98221667	17.28620278	Annelida	Polychaeta	Phyllodocida	Nereididae	Composetia	Composetia hircinicola	(Eisig, 1869)	Composetia hircinicola (Eisig, 1869)
396	MIB	Adriatic Sea	Capitolo	40.94719344	17.449318	Annelida	Polychaeta	Phyllodocida	Nereididae	Composetia	Composetia hircinicola	(Eisig, 1869)	Composetia hircinicola (Eisig, 1869)
396	MAB	Adriatic Sea	Monopoli	40.98221667	17.28620278	Annelida	Polychaeta	Phyllodocida	Nereididae	Composetia	Composetia hircinicola	(Eisig, 1869)	Composetia hircinicola (Eisig, 1869)
397	MIB	Adriatic Sea	Tremiti	42.13825300	15.522442	Annelida	Polychaeta	Phyllodocida	Nereididae	Neanthes	Neanthes rubicunda	(Ehlers, 1868)	Neanthes rubicunda (Ehlers, 1868)
397	MAB	Adriatic Sea	Otranto	40.12885900	18.520781	Annelida	Polychaeta	Phyllodocida	Nereididae	Neanthes	Neanthes rubicunda	(Ehlers, 1868)	Neanthes rubicunda (Ehlers, 1868)
398	MIB	Adriatic Sea	Monopoli	40.98221667	17.28620278	Annelida	Polychaeta	Phyllodocida	Nereididae	Nereis	Nereis	Linnaeus, 1758	Nereis Linnaeus, 1758
398	MAB	Adriatic Sea	Monopoli	40.98221667	17.28620278	Annelida	Polychaeta	Phyllodocida	Nereididae	Nereis	Nereis	Linnaeus, 1758	Nereis Linnaeus, 1758
399	MAB	Adriatic Sea	Monopoli	40.98221667	17.28620278	Annelida	Polychaeta	Phyllodocida	Nereididae	Nereis	Nereis perivisceralis	Claparde, 1868	Nereis perivisceralis Claparde, 1868
399	MAB	Adriatic Sea	San Foca	40.32417820	18.46629286	Annelida	Polychaeta	Phyllodocida	Nereididae	Nereis	Nereis perivisceralis	Claparde, 1868	Nereis perivisceralis Claparde, 1868
400	MIB	Adriatic Sea	Tremiti	42.13825300	15.522442	Annelida	Polychaeta	Phyllodocida	Nereididae	Nereis	Nereis rava	Ehlers, 1868	Nereis rava Ehlers, 1868
400	MIB	Adriatic Sea	San Foca	40.3241782	18.4662928	Annelida	Polychaeta	Phyllodocida	Nereididae	Nereis	Nereis rava	Ehlers, 1868	Nereis rava Ehlers, 1868
400	MAB	Adriatic Sea	Monopoli	40.98221667	17.28620278	Annelida	Polychaeta	Phyllodocida	Nereididae	Nereis	Nereis rava	Ehlers, 1868	Nereis rava Ehlers, 1868
400	MAB	Adriatic Sea	Capitolo	40.94719344	17.449318	Annelida	Polychaeta	Phyllodocida	Nereididae	Nereis	Nereis rava	Ehlers, 1868	Nereis rava Ehlers, 1868
400	MAB	Adriatic Sea	Tremiti	42.1382530	15.52244	Annelida	Polychaeta	Phyllodocida	Nereididae	Nereis	Nereis rava	Ehlers, 1868	Nereis rava Ehlers, 1868
400	MAB	Adriatic Sea	San Foca	40.32417820	18.46629286	Annelida	Polychaeta	Phyllodocida	Nereididae	Nereis	Nereis rava	Ehlers, 1868	Nereis rava Ehlers, 1868
401	MIB	Adriatic Sea	Tremiti	42.13825300	15.522442	Annelida	Polychaeta	Phyllodocida	Nereididae	Platynereis	Platynereis coccinea	(Delle Chiaje, 1822)	Platynereis coccinea (Delle Chiaje, 1822)
401	MIB	Adriatic Sea	Monopoli	40.98221667	17.28620278	Annelida	Polychaeta	Phyllodocida	Nereididae	Platynereis	Platynereis coccinea	(Delle Chiaje, 1822)	Platynereis coccinea (Delle Chiaje, 1822)
401	MIB	Adriatic Sea	Otranto	40.1288590	18.520781	Annelida	Polychaeta	Phyllodocida	Nereididae	Platynereis	Platynereis coccinea	(Delle Chiaje, 1822)	Platynereis coccinea (Delle Chiaje, 1822)
401	MAB	Adriatic Sea	Tremiti	42.1382530	15.52244	Annelida	Polychaeta	Phyllodocida	Nereididae	Platynereis	Platynereis coccinea	(Delle Chiaje, 1822)	Platynereis coccinea (Delle Chiaje, 1822)
401	MAB	Adriatic Sea	San Foca	40.32417820	18.46629286	Annelida	Polychaeta	Phyllodocida	Nereididae	Platynereis	Platynereis coccinea	(Delle Chiaje, 1822)	Platynereis coccinea (Delle Chiaje, 1822)
402	MIB	Adriatic Sea	Monopoli	40.98221667	17.28620278	Annelida	Polychaeta	Phyllodocida	Nereididae		Nereididae	Blainville, 1818	Nereididae Blainville, 1818
402	MIB	Adriatic Sea	San Foca	40.3241782	18.4662928	Annelida	Polychaeta	Phyllodocida	Nereididae		Nereididae	Blainville, 1818	Nereididae Blainville, 1818
402	MAB	Adriatic Sea	Otranto	40.12885900	18.520781	Annelida	Polychaeta	Phyllodocida	Nereididae		Nereididae	Blainville, 1818	Nereididae Blainville, 1818
402	MAB	Ionian Sea	Santa Maria di Leuca	39.73114575	18.347193	Annelida	Polychaeta	Phyllodocida	Nereididae		Nereididae	Blainville, 1818	Nereididae Blainville, 1818
402	MAB	Adriatic Sea	San Foca	40.32417820	18.46629286	Annelida	Polychaeta	Phyllodocida	Nereididae		Nereididae	Blainville, 1818	Nereididae Blainville, 1818
403	MAB	Adriatic Sea	Monopoli	40.98221667	17.28620278	Annelida	Polychaeta	Phyllodocida	Paralacydoniidae	Paralacydonia	Paralacydonia paradoxa	Fauvel, 1913	Paralacydonia paradoxa Fauvel, 1913
404	MIB	Adriatic Sea	Monopoli	40.98221667	17.28620278	Annelida	Polychaeta	Phyllodocida	Phyllodocidae	Eumida	Eumida sanguinea	(Orsted, 1843)	Eumida sanguinea (Orsted, 1843)
404	MAB	Adriatic Sea	Monopoli	40.98221667	17.28620278	Annelida	Polychaeta	Phyllodocida	Phyllodocidae	Eumida	Eumida sanguinea	(Orsted, 1843)	Eumida sanguinea (Orsted, 1843)
405	MAB	Adriatic Sea	San Foca	40.32417820	18.46629286	Annelida	Polychaeta	Phyllodocida	Phyllodocidae	Nereiphylla	Nereiphylla pusilla	(Claparde, 1870)	Nereiphylla pusilla (Claparde, 1870)
405	MAB	Adriatic Sea	Otranto	40.12885900	18.520781	Annelida	Polychaeta	Phyllodocida	Phyllodocidae	Nereiphylla	Nereiphylla pusilla	(Claparde, 1870)	Nereiphylla pusilla (Claparde, 1870)
406	MIB	Adriatic Sea	Monopoli	40.98221667	17.28620278	Annelida	Polychaeta	Phyllodocida	Phyllodocidae	Phyllodoce	Phyllodoce	Lamarck, 1818	Phyllodoce Lamarck, 1818
406	MAB	Adriatic Sea	Monopoli	40.98221667	17.28620278	Annelida	Polychaeta	Phyllodocida	Phyllodocidae	Phyllodoce	Phyllodoce	Lamarck, 1818	Phyllodoce Lamarck, 1818
407	MAB	Adriatic Sea	Monopoli	40.98221667	17.28620278	Annelida	Polychaeta	Phyllodocida	Phyllodocidae	Phyllodoce	Phyllodoce lineata	(Claparde, 1870)	Phyllodoce lineata (Claparde, 1870)
407	MAB	Adriatic Sea	Capitolo	40.94719344	17.449318	Annelida	Polychaeta	Phyllodocida	Phyllodocidae	Phyllodoce	Phyllodoce lineata	(Claparde, 1870)	Phyllodoce lineata (Claparde, 1870)
408	MAB	Adriatic Sea	Capitolo	40.94719344	17.449318	Annelida	Polychaeta	Phyllodocida	Phyllodocidae	Pterocirrus	Pterocirrus macroceros (Grube, 1860)	(Grube, 1860)	Pterocirrus macroceros (Grube, 1860)
409	MIB	Adriatic Sea	Capitolo	40.94719344	17.449318	Annelida	Polychaeta	Phyllodocida	Phyllodocidae	Örsted, 1843	Phyllodocidae	Örsted, 1843	Phyllodocidae Örsted, 1843
410	MIB	Adriatic Sea	Monopoli	40.98221667	17.28620278	Annelida	Polychaeta	Phyllodocida	Polynoidae	Harmothoe	Harmothoe	Kinberg, 1856	Harmothoe Kinberg, 1856
410	MAB	Adriatic Sea	Monopoli	40.98221667	17.28620278	Annelida	Polychaeta	Phyllodocida	Polynoidae	Harmothoe	Harmothoe	Kinberg, 1856	Harmothoe Kinberg, 1856
411	MIB	Adriatic Sea	Monopoli	40.98221667	17.28620278	Annelida	Polychaeta	Phyllodocida	Polynoidae	Harmothoe	Harmothoe antilopes	McIntosh, 1876	Harmothoe antilopes McIntosh, 1876
412	MAB	Ionian Sea	Santa Maria di Leuca	39.73114575	18.347193	Annelida	Polychaeta	Phyllodocida	Polynoidae	Harmothoe	Harmothoe areolata	(Grube, 1860)	Harmothoe areolata (Grube, 1860)
412	MAB	Adriatic Sea	Otranto	40.12885900	18.520781	Annelida	Polychaeta	Phyllodocida	Polynoidae	Harmothoe	Harmothoe areolata	(Grube, 1860)	Harmothoe areolata (Grube, 1860)
413	MIB	Adriatic Sea	Tremiti	42.13825300	15.522442	Annelida	Polychaeta	Phyllodocida	Polynoidae	Harmothoe	Harmothoe extenuata	(Grube, 1840)	Harmothoe extenuata (Grube, 1840)
413	MIB	Adriatic Sea	San Foca	40.3241782	18.4662928	Annelida	Polychaeta	Phyllodocida	Polynoidae	Harmothoe	Harmothoe extenuata	(Grube, 1840)	Harmothoe extenuata (Grube, 1840)
413	MAB	Adriatic Sea	Capitolo	40.94719344	17.449318	Annelida	Polychaeta	Phyllodocida	Polynoidae	Harmothoe	Harmothoe extenuata	(Grube, 1840)	Harmothoe extenuata (Grube, 1840)
413	MAB	Adriatic Sea	Tremiti	42.1382530	15.52244	Annelida	Polychaeta	Phyllodocida	Polynoidae	Harmothoe	Harmothoe extenuata	(Grube, 1840)	Harmothoe extenuata (Grube, 1840)
413	MAB	Adriatic Sea	San Foca	40.32417820	18.46629286	Annelida	Polychaeta	Phyllodocida	Polynoidae	Harmothoe	Harmothoe extenuata	(Grube, 1840)	Harmothoe extenuata (Grube, 1840)
414	MAB	Adriatic Sea	Capitolo	40.94719344	17.449318	Annelida	Polychaeta	Phyllodocida	Polynoidae	Harmothoe	Harmothoe spinifera (Ehlers, 1864)	(Ehlers, 1864)	Harmothoe spinifera (Ehlers, 1864)
414	MAB	Adriatic Sea	Otranto	40.94719344	17.449318	Annelida	Polychaeta	Phyllodocida	Polynoidae	Harmothoe	Harmothoe spinifera (Ehlers, 1864)	(Ehlers, 1864)	Harmothoe spinifera (Ehlers, 1864)
415	MIB	Adriatic Sea	Otranto	40.1288590	18.520781	Annelida	Polychaeta	Phyllodocida	Polynoidae	Harmothoe	Harmothoe pagenstecheri	Michaelsen, 1896	Harmothoe pagenstecheri Michaelsen, 1896
415	MIB	Ionian Sea	Santa Maria di Leuca	39.73114575	18.347193	Annelida	Polychaeta	Phyllodocida	Polynoidae	Harmothoe	Harmothoe pagenstecheri	Michaelsen, 1896	Harmothoe pagenstecheri Michaelsen, 1896
416	MIB	Adriatic Sea	Monopoli	40.98221667	17.28620278	Annelida	Polychaeta	Phyllodocida	Polynoidae	Lepidasthenia	Lepidasthenia elegans	(Grube, 1840)	Lepidasthenia elegans (Grube, 1840)
416	MIB	Adriatic Sea	Capitolo	40.94719344	17.449318	Annelida	Polychaeta	Phyllodocida	Polynoidae	Lepidasthenia	Lepidasthenia elegans	(Grube, 1840)	Lepidasthenia elegans (Grube, 1840)
416	MAB	Adriatic Sea	Monopoli	40.98221667	17.28620278	Annelida	Polychaeta	Phyllodocida	Polynoidae	Lepidasthenia	Lepidasthenia elegans	(Grube, 1840)	Lepidasthenia elegans (Grube, 1840)
417	MAB	Adriatic Sea	Capitolo	40.94719344	17.449318	Annelida	Polychaeta	Phyllodocida	Polynoidae	Polynoe	Polynoe scolopendrina	Savigny, 1822	Polynoe scolopendrina Savigny, 1822
418	MIB	Adriatic Sea	Tremiti	42.13825300	15.522442	Annelida	Polychaeta	Phyllodocida	Polynoidae	Subadyte	Subadyte pellucida	(Ehlers, 1864)	Subadyte pellucida (Ehlers, 1864)
418	MAB	Adriatic Sea	San Foca	40.32417820	18.46629286	Annelida	Polychaeta	Phyllodocida	Polynoidae	Subadyte	Subadyte pellucida	(Ehlers, 1864)	Subadyte pellucida (Ehlers, 1864)
419	MIB	Adriatic Sea	Tremiti	42.13825300	15.522442	Annelida	Polychaeta	Phyllodocida	Polynoidae		Polynoidae		Polynoidae spp.
419	MAB	Adriatic Sea	Monopoli	40.98221667	17.28620278	Annelida	Polychaeta	Phyllodocida	Polynoidae		Polynoidae		Polynoidae spp.
419	MAB	Adriatic Sea	Tremiti	42.1382530	15.52244	Annelida	Polychaeta	Phyllodocida	Polynoidae		Polynoidae		Polynoidae spp.
420	MIB	Adriatic Sea	Monopoli	40.98221667	17.28620278	Annelida	Polychaeta	Phyllodocida	Sigalionidae	Sthenelais	Sthenelais boa	(Johnston, 1833)	Sthenelais boa (Johnston, 1833)
420	MAB	Adriatic Sea	Otranto	40.12885900	18.520781	Annelida	Polychaeta	Phyllodocida	Sigalionidae	Sthenelais	Sthenelais boa	(Johnston, 1833)	Sthenelais boa (Johnston, 1833)
420	MAB	Adriatic Sea	Tremiti	42.1382530	15.52244	Annelida	Polychaeta	Phyllodocida	Sigalionidae	Sthenelais	Sthenelais boa	(Johnston, 1833)	Sthenelais boa (Johnston, 1833)
421	MIB	Adriatic Sea	San Foca	40.3241782	18.4662928	Annelida	Polychaeta	Phyllodocida	Syllidae	Haplosyllis	Haplosyllis chamaeleon	Laubier, 1960	Haplosyllis chamaeleon Laubier, 1960
422	MIB	Adriatic Sea	Monopoli	40.98221667	17.28620278	Annelida	Polychaeta	Phyllodocida	Syllidae	Haplosyllis	Haplosyllis spongicola	(Grube, 1855)	Haplosyllis spongicola (Grube, 1855)
422	MIB	Adriatic Sea	Capitolo	40.94719344	17.449318	Annelida	Polychaeta	Phyllodocida	Syllidae	Haplosyllis	Haplosyllis spongicola	(Grube, 1855)	Haplosyllis spongicola (Grube, 1855)
422	MIB	Adriatic Sea	Otranto	40.1288590	18.520781	Annelida	Polychaeta	Phyllodocida	Syllidae	Haplosyllis	Haplosyllis spongicola	(Grube, 1855)	Haplosyllis spongicola (Grube, 1855)
422	MIB	Adriatic Sea	Tremiti	42.13825300	15.522442	Annelida	Polychaeta	Phyllodocida	Syllidae	Haplosyllis	Haplosyllis spongicola	(Grube, 1855)	Haplosyllis spongicola (Grube, 1855)
422	MIB	Adriatic Sea	San Foca	40.3241782	18.4662928	Annelida	Polychaeta	Phyllodocida	Syllidae	Haplosyllis	Haplosyllis spongicola	(Grube, 1855)	Haplosyllis spongicola (Grube, 1855)
422	MAB	Adriatic Sea	Monopoli	40.98221667	17.28620278	Annelida	Polychaeta	Phyllodocida	Syllidae	Haplosyllis	Haplosyllis spongicola	(Grube, 1855)	Haplosyllis spongicola (Grube, 1855)
422	MAB	Adriatic Sea	Capitolo	40.94719344	17.449318	Annelida	Polychaeta	Phyllodocida	Syllidae	Haplosyllis	Haplosyllis spongicola	(Grube, 1855)	Haplosyllis spongicola (Grube, 1855)
422	MAB	Adriatic Sea	Tremiti	42.1382530	15.52244	Annelida	Polychaeta	Phyllodocida	Syllidae	Haplosyllis	Haplosyllis spongicola	(Grube, 1855)	Haplosyllis spongicola (Grube, 1855)
422	MAB	Adriatic Sea	San Foca	40.32417820	18.46629286	Annelida	Polychaeta	Phyllodocida	Syllidae	Haplosyllis	Haplosyllis spongicola	(Grube, 1855)	Haplosyllis spongicola (Grube, 1855)
423	MAB	Adriatic Sea	Capitolo	40.94719344	17.449318	Annelida	Polychaeta	Phyllodocida	Syllidae	Odontosyllis	Odontosyllis ctenostoma	Claparde, 1868	Odontosyllis ctenostoma Claparde, 1868
424	MAB	Adriatic Sea	Monopoli	40.98221667	17.28620278	Annelida	Polychaeta	Phyllodocida	Syllidae	Paraehlersia	Paraehlersia ferrugina	(Langerhans, 1881)	Paraehlersia ferrugina (Langerhans, 1881)
425	MAB	Adriatic Sea	Monopoli	40.98221667	17.28620278	Annelida	Polychaeta	Phyllodocida	Syllidae	Parapionosyllis	Parapionosyllis brevicirra	Day, 1954	Parapionosyllis brevicirra Day, 1954
426	MIB	Adriatic Sea	Tremiti	42.13825300	15.522442	Annelida	Polychaeta	Phyllodocida	Syllidae	Syllis	Syllis alternata	Moore, 1908	Syllis alternata Moore, 1908
426	MIB	Adriatic Sea	Monopoli	40.98221667	17.28620278	Annelida	Polychaeta	Phyllodocida	Syllidae	Syllis	Syllis alternata	Moore, 1908	Syllis alternata Moore, 1908
426	MAB	Ionian Sea	Santa Maria di Leuca	39.73114575	18.347193	Annelida	Polychaeta	Phyllodocida	Syllidae	Syllis	Syllis alternata	Moore, 1908	Syllis alternata Moore, 1908
426	MAB	Adriatic Sea	San Foca	40.32417820	18.46629286	Annelida	Polychaeta	Phyllodocida	Syllidae	Syllis	Syllis alternata	Moore, 1908	Syllis alternata Moore, 1908
426	MAB	Adriatic Sea	Monopoli	40.98221667	17.28620278	Annelida	Polychaeta	Phyllodocida	Syllidae	Syllis	Syllis alternata	Moore, 1908	Syllis alternata Moore, 1908
427	MAB	Ionian Sea	Santa Maria di Leuca	39.73114575	18.347193	Annelida	Polychaeta	Phyllodocida	Syllidae	Syllis	Syllis amica	Quatrefages, 1866	Syllis amica Quatrefages, 1866
427	MAB	Adriatic Sea	Monopoli	40.98221667	17.28620278	Annelida	Polychaeta	Phyllodocida	Syllidae	Syllis	Syllis amica	Quatrefages, 1866	Syllis amica Quatrefages, 1866
428	MIB	Adriatic Sea	Tremiti	42.13825300	15.522442	Annelida	Polychaeta	Phyllodocida	Syllidae	Syllis	Syllis armillaris	(O.F. Mller, 1776)	Syllis armillaris (O.F. Mller, 1776)
428	MIB	Adriatic Sea	San Foca	40.3241782	18.4662928	Annelida	Polychaeta	Phyllodocida	Syllidae	Syllis	Syllis armillaris	(O.F. Mller, 1776)	Syllis armillaris (O.F. Mller, 1776)
428	MIB	Adriatic Sea	Monopoli	40.98221667	17.28620278	Annelida	Polychaeta	Phyllodocida	Syllidae	Syllis	Syllis armillaris	(O.F. Mller, 1776)	Syllis armillaris (O.F. Mller, 1776)
428	MAB	Adriatic Sea	Monopoli	40.98221667	17.28620278	Annelida	Polychaeta	Phyllodocida	Syllidae	Syllis	Syllis armillaris	(O.F. Mller, 1776)	Syllis armillaris (O.F. Mller, 1776)
428	MAB	Adriatic Sea	Capitolo	40.94719344	17.449318	Annelida	Polychaeta	Phyllodocida	Syllidae	Syllis	Syllis armillaris	(O.F. Mller, 1776)	Syllis armillaris (O.F. Mller, 1776)
428	MAB	Adriatic Sea	Tremiti	42.1382530	15.52244	Annelida	Polychaeta	Phyllodocida	Syllidae	Syllis	Syllis armillaris	(O.F. Mller, 1776)	Syllis armillaris (O.F. Mller, 1776)
428	MAB	Adriatic Sea	San Foca	40.32417820	18.46629286	Annelida	Polychaeta	Phyllodocida	Syllidae	Syllis	Syllis armillaris	(O.F. Mller, 1776)	Syllis armillaris (O.F. Mller, 1776)
429	MAB	Adriatic Sea	Monopoli	40.98221667	17.28620278	Annelida	Polychaeta	Phyllodocida	Syllidae	Syllis	Syllis columbretensis	(Campoy, 1982)	Syllis columbretensis (Campoy, 1982)
429	MAB	Adriatic Sea	Otranto	40.94719344	17.449318	Annelida	Polychaeta	Phyllodocida	Syllidae	Syllis	Syllis columbretensis	(Campoy, 1982)	Syllis columbretensis (Campoy, 1982)
429	MAB	Ionian Sea	Santa Maria di Leuca	39.73114575	18.347193	Annelida	Polychaeta	Phyllodocida	Syllidae	Syllis	Syllis columbretensis	(Campoy, 1982)	Syllis columbretensis (Campoy, 1982)
430	MAB	Adriatic Sea	Tremiti	42.1382530	15.52244	Annelida	Polychaeta	Phyllodocida	Syllidae	Syllis	Syllis compacta	Gravier, 1900	Syllis compacta Gravier, 1900
431	MIB	Adriatic Sea	Tremiti	42.13825300	15.522442	Annelida	Polychaeta	Phyllodocida	Syllidae	Syllis	Syllis ferrani	Al¢s & San Mart¡n, 1987	Syllis ferrani Al¢s & San Mart¡n, 1987
431	MIB	Adriatic Sea	Otranto	40.1288590	18.520781	Annelida	Polychaeta	Phyllodocida	Syllidae	Syllis	Syllis ferrani	Al¢s & San Mart¡n, 1987	Syllis ferrani Al¢s & San Mart¡n, 1987
431	MIB	Adriatic Sea	San Foca	40.3241782	18.4662928	Annelida	Polychaeta	Phyllodocida	Syllidae	Syllis	Syllis ferrani	Al¢s & San Mart¡n, 1987	Syllis ferrani Al¢s & San Mart¡n, 1987
431	MAB	Adriatic Sea	Capitolo	40.94719344	17.449318	Annelida	Polychaeta	Phyllodocida	Syllidae	Syllis	Syllis ferrani	Al¢s & San Mart¡n, 1987	Syllis ferrani Al¢s & San Mart¡n, 1987
432	MAB	Adriatic Sea	Otranto	40.94719344	17.449318	Annelida	Polychaeta	Phyllodocida	Syllidae	Syllis	Syllis garciai	(Campoy, 1982)	Syllis garciai (Campoy, 1982)
432	MAB	Adriatic Sea	San Foca	40.32417820	18.46629286	Annelida	Polychaeta	Phyllodocida	Syllidae	Syllis	Syllis garciai	(Campoy, 1982)	Syllis garciai (Campoy, 1982)
433	MAB	Adriatic Sea	Otranto	40.94719344	17.449318	Annelida	Polychaeta	Phyllodocida	Syllidae	Syllis	Syllis gerlachi	(Hartmann-Schrder, 1960)	Syllis gerlachi (Hartmann-Schrder, 1960)
433	MAB	Adriatic Sea	San Foca	40.32417820	18.46629286	Annelida	Polychaeta	Phyllodocida	Syllidae	Syllis	Syllis gerlachi	(Hartmann-Schrder, 1960)	Syllis gerlachi (Hartmann-Schrder, 1960)
433	MAB	Adriatic Sea	Monopoli	40.98221667	17.28620278	Annelida	Polychaeta	Phyllodocida	Syllidae	Syllis	Syllis gerlachi	(Hartmann-Schrder, 1960)	Syllis gerlachi (Hartmann-Schrder, 1960)
433	MIB	Adriatic Sea	Monopoli	40.98221667	17.28620278	Annelida	Polychaeta	Phyllodocida	Syllidae	Syllis	Syllis gerlachi	(Hartmann-Schrder, 1960)	Syllis gerlachi (Hartmann-Schrder, 1960)
434	MAB	Adriatic Sea	Monopoli	40.98221667	17.28620278	Annelida	Polychaeta	Phyllodocida	Syllidae	Syllis	Syllis gerundensis	(Al¢s & Campoy, 1981)	Syllis gerundensis (Al¢s & Campoy, 1981)
434	MAB	Adriatic Sea	Capitolo	40.94719344	17.449318	Annelida	Polychaeta	Phyllodocida	Syllidae	Syllis	Syllis gerundensis	(Al¢s & Campoy, 1981)	Syllis gerundensis (Al¢s & Campoy, 1981)
434	MAB	Adriatic Sea	San Foca	40.32417820	18.46629286	Annelida	Polychaeta	Phyllodocida	Syllidae	Syllis	Syllis gerundensis	(Al¢s & Campoy, 1981)	Syllis gerundensis (Al¢s & Campoy, 1981)
435	MIB	Adriatic Sea	Otranto	40.1288590	18.520781	Annelida	Polychaeta	Phyllodocida	Syllidae	Syllis	Syllis gracilis	Grube, 1840	Syllis gracilis Grube, 1840
435	MIB	Adriatic Sea	Monopoli	40.98221667	17.28620278	Annelida	Polychaeta	Phyllodocida	Syllidae	Syllis	Syllis gracilis	Grube, 1840	Syllis gracilis Grube, 1840
435	MIB	Adriatic Sea	Tremiti	42.13825300	15.522442	Annelida	Polychaeta	Phyllodocida	Syllidae	Syllis	Syllis gracilis	Grube, 1840	Syllis gracilis Grube, 1840
435	MIB	Adriatic Sea	San Foca	40.3241782	18.4662928	Annelida	Polychaeta	Phyllodocida	Syllidae	Syllis	Syllis gracilis	Grube, 1840	Syllis gracilis Grube, 1840
435	MAB	Adriatic Sea	Monopoli	40.98221667	17.28620278	Annelida	Polychaeta	Phyllodocida	Syllidae	Syllis	Syllis gracilis	Grube, 1840	Syllis gracilis Grube, 1840
436	MIB	Adriatic Sea	San Foca	40.3241782	18.4662928	Annelida	Polychaeta	Phyllodocida	Syllidae	Syllis	Syllis hyalina	Grube, 1863	Syllis hyalina Grube, 1863
436	MAB	Adriatic Sea	Capitolo	40.94719344	17.449318	Annelida	Polychaeta	Phyllodocida	Syllidae	Syllis	Syllis hyalina	Grube, 1863	Syllis hyalina Grube, 1863
436	MAB	Adriatic Sea	Tremiti	42.1382530	15.52244	Annelida	Polychaeta	Phyllodocida	Syllidae	Syllis	Syllis hyalina	Grube, 1863	Syllis hyalina Grube, 1863
436	MAB	Adriatic Sea	San Foca	40.32417820	18.46629286	Annelida	Polychaeta	Phyllodocida	Syllidae	Syllis	Syllis hyalina	Grube, 1863	Syllis hyalina Grube, 1863
437	MIB	Adriatic Sea	San Foca	40.3241782	18.4662928	Annelida	Polychaeta	Phyllodocida	Syllidae	Syllis	Syllis krohnii	Ehlers, 1864	Syllis krohnii Ehlers, 1864
437	MAB	Adriatic Sea	San Foca	40.32417820	18.46629286	Annelida	Polychaeta	Phyllodocida	Syllidae	Syllis	Syllis krohnii	Ehlers, 1864	Syllis krohnii Ehlers, 1864
438	MIB	Adriatic Sea	Monopoli	40.98221667	17.28620278	Annelida	Polychaeta	Phyllodocida	Syllidae	Syllis	Syllis parapari	San Martín & López, 2000	Syllis parapari San Martín & López, 2000
438	MAB	Adriatic Sea	Monopoli	40.98221667	17.28620278	Annelida	Polychaeta	Phyllodocida	Syllidae	Syllis	Syllis parapari	San Martín & López, 2000	Syllis parapari San Martín & López, 2000
439	MIB	Adriatic Sea	Monopoli	40.98221667	17.28620278	Annelida	Polychaeta	Phyllodocida	Syllidae	Syllis	Syllis pectinans	Haswell, 1920	Syllis pectinans Haswell, 1920
439	MIB	Adriatic Sea	Tremiti	42.13825300	15.522442	Annelida	Polychaeta	Phyllodocida	Syllidae	Syllis	Syllis pectinans	Haswell, 1920	Syllis pectinans Haswell, 1920
439	MIB	Adriatic Sea	San Foca	40.3241782	18.4662928	Annelida	Polychaeta	Phyllodocida	Syllidae	Syllis	Syllis pectinans	Haswell, 1920	Syllis pectinans Haswell, 1920
440	MIB	Adriatic Sea	Capitolo	40.94719344	17.449318	Annelida	Polychaeta	Phyllodocida	Syllidae	Syllis	Syllis variegata	Grube, 1860	Syllis variegata Grube, 1860
440	MIB	Adriatic Sea	Tremiti	42.13825300	15.522442	Annelida	Polychaeta	Phyllodocida	Syllidae	Syllis	Syllis variegata	Grube, 1860	Syllis variegata Grube, 1860
440	MIB	Adriatic Sea	San Foca	40.3241782	18.4662928	Annelida	Polychaeta	Phyllodocida	Syllidae	Syllis	Syllis variegata	Grube, 1860	Syllis variegata Grube, 1860
440	MIB	Adriatic Sea	Monopoli	40.98221667	17.28620278	Annelida	Polychaeta	Phyllodocida	Syllidae	Syllis	Syllis variegata	Grube, 1860	Syllis variegata Grube, 1860
440	MIB	Ionian Sea	Santa Maria di Leuca	39.73114575	18.347193	Annelida	Polychaeta	Phyllodocida	Syllidae	Syllis	Syllis variegata	Grube, 1860	Syllis variegata Grube, 1860
440	MAB	Adriatic Sea	Monopoli	40.98221667	17.28620278	Annelida	Polychaeta	Phyllodocida	Syllidae	Syllis	Syllis variegata	Grube, 1860	Syllis variegata Grube, 1860
440	MAB	Adriatic Sea	Capitolo	40.94719344	17.449318	Annelida	Polychaeta	Phyllodocida	Syllidae	Syllis	Syllis variegata	Grube, 1860	Syllis variegata Grube, 1860
441	MIB	Adriatic Sea	Monopoli	40.98221667	17.28620278	Annelida	Polychaeta	Phyllodocida	Syllidae	Syllis	Syllis	Lamarck, 1818	Syllis Lamarck, 1818
441	MIB	Adriatic Sea	Capitolo	40.94719344	17.449318	Annelida	Polychaeta	Phyllodocida	Syllidae	Syllis	Syllis	Lamarck, 1818	Syllis Lamarck, 1818
441	MAB	Ionian Sea	Santa Maria di Leuca	39.73114575	18.347193	Annelida	Polychaeta	Phyllodocida	Syllidae	Syllis	Syllis	Lamarck, 1818	Syllis Lamarck, 1818
441	MAB	Adriatic Sea	Capitolo	40.94719344	17.449318	Annelida	Polychaeta	Phyllodocida	Syllidae	Syllis	Syllis	Lamarck, 1818	Syllis Lamarck, 1818
442	MAB	Adriatic Sea	San Foca	40.32417820	18.46629286	Annelida	Polychaeta	Phyllodocida	Syllidae	Sphaerosyllis	Sphaerosyllis pirifera	Claparde, 1868	Sphaerosyllis pirifera Claparde, 1868
443	MIB	Ionian Sea	Santa Maria di Leuca	39.73114575	18.347193	Annelida	Polychaeta	Phyllodocida	Syllidae	Sphaerosyllis	Sphaerosyllis hystrix	Claparède, 1863	Sphaerosyllis hystrix Claparède, 1863
443	MIB	Adriatic Sea	Otranto	40.1288590	18.520781	Annelida	Polychaeta	Phyllodocida	Syllidae	Sphaerosyllis	Sphaerosyllis hystrix	Claparède, 1863	Sphaerosyllis hystrix Claparède, 1863
443	MAB	Adriatic Sea	San Foca	40.32417820	18.46629286	Annelida	Polychaeta	Phyllodocida	Syllidae	Sphaerosyllis	Sphaerosyllis hystrix	Claparède, 1863	Sphaerosyllis hystrix Claparède, 1863
443	MAB	Adriatic Sea	Monopoli	40.98221667	17.28620278	Annelida	Polychaeta	Phyllodocida	Syllidae	Sphaerosyllis	Sphaerosyllis hystrix	Claparède, 1863	Sphaerosyllis hystrix Claparède, 1863
444	MIB	Adriatic Sea	Tremiti	42.13825300	15.522442	Annelida	Polychaeta	Phyllodocida	Syllidae	Trypanosyllis	Trypanosyllis aeolis	Langerhans, 1879	Trypanosyllis aeolis Langerhans, 1879
445	MIB	Adriatic Sea	Tremiti	42.13825300	15.522442	Annelida	Polychaeta	Phyllodocida	Syllidae	Trypanosyllis	Trypanosyllis zebra	(Grube, 1860)	Trypanosyllis zebra (Grube, 1860)
446	MAB	Adriatic Sea	Capitolo	40.94719344	17.449318	Annelida	Polychaeta	Phyllodocida	Syllidae	Typosyllis	Typosyllis attenuata	(Knox, 1960)	Typosyllis attenuata (Knox, 1960)
447	MAB	Ionian Sea	Santa Maria di Leuca	39.73114575	18.347193	Annelida	Polychaeta	Phyllodocida	Syllidae		Syllidae		Syllidae
447	MAB	Adriatic Sea	Monopoli	40.98221667	17.28620278	Annelida	Polychaeta	Phyllodocida	Syllidae		Syllidae		Syllidae
448	MIB	Adriatic Sea	Monopoli	40.98221667	17.28620278	Annelida	Polychaeta	Sabellida	Sabellidae	Hypsicomus	Hypsicomus stichophthalmos		Hypsicomus stichophthalmos (Grube, 1863)
449	MAB	Ionian Sea	Santa Maria di Leuca	39.73114575	18.347193	Annelida	Polychaeta	Sabellida	Sabellidae	Parasabella	Parasabella		Parasabella sp.
450	MAB	Ionian Sea	Santa Maria di Leuca	39.73114575	18.347193	Annelida	Polychaeta	Sabellida	Sabellidae	Sabella	Sabella spallanzanii	(Gmelin, 1791)	Sabella spallanzanii (Gmelin, 1791)
450	MAB	Adriatic Sea	Tremiti	42.1382530	15.52244	Annelida	Polychaeta	Sabellida	Sabellidae	Sabella	Sabella spallanzanii	(Gmelin, 1791)	Sabella spallanzanii (Gmelin, 1791)
451	MIB	Adriatic Sea	Capitolo	40.94719344	17.449318	Annelida	Polychaeta	Sabellida	Sabellidae		Sabellidae		Sabellidae spp.
451	MIB	Adriatic Sea	Tremiti	42.13825300	15.522442	Annelida	Polychaeta	Sabellida	Sabellidae		Sabellidae		Sabellidae spp.
451	MIB	Adriatic Sea	San Foca	40.3241782	18.4662928	Annelida	Polychaeta	Sabellida	Sabellidae		Sabellidae		Sabellidae spp.
451	MAB	Adriatic Sea	Capitolo	40.94719344	17.449318	Annelida	Polychaeta	Sabellida	Sabellidae		Sabellidae		Sabellidae spp.
451	MAB	Adriatic Sea	San Foca	40.32417820	18.46629286	Annelida	Polychaeta	Sabellida	Sabellidae		Sabellidae		Sabellidae spp.
452	MIB	Ionian Sea	Santa Maria di Leuca	39.73114575	18.347193	Annelida	Polychaeta	Sabellida	Serpulidae	Bathyvermilia	Bathyvermilia eliasoni	(Zibrowius, 1970)	Bathyvermilia eliasoni (Zibrowius, 1970)
453	MIB	Adriatic Sea	Otranto	40.1288590	18.520781	Annelida	Polychaeta	Sabellida	Serpulidae	Filograna	Filograna implexa	Berkeley, 1835	Filograna implexa Berkeley, 1835
453	MIB	Ionian Sea	Santa Maria di Leuca	39.73114575	18.347193	Annelida	Polychaeta	Sabellida	Serpulidae	Filograna	Filograna implexa	Berkeley, 1835	Filograna implexa Berkeley, 1835
453	MIB	Adriatic Sea	Monopoli	40.98221667	17.28620278	Annelida	Polychaeta	Sabellida	Serpulidae	Filograna	Filograna implexa	Berkeley, 1835	Filograna implexa Berkeley, 1835
453	MAB	Adriatic Sea	Otranto	40.12885900	18.520781	Annelida	Polychaeta	Sabellida	Serpulidae	Filograna	Filograna implexa	Berkeley, 1835	Filograna implexa Berkeley, 1835
453	MAB	Ionian Sea	Santa Maria di Leuca	39.73114575	18.347193	Annelida	Polychaeta	Sabellida	Serpulidae	Filograna	Filograna implexa	Berkeley, 1835	Filograna implexa Berkeley, 1835
453	MAB	Adriatic Sea	Monopoli	40.98221667	17.28620278	Annelida	Polychaeta	Sabellida	Serpulidae	Filograna	Filograna implexa	Berkeley, 1835	Filograna implexa Berkeley, 1835
453	MAB	Adriatic Sea	Tremiti	42.1382530	15.52244	Annelida	Polychaeta	Sabellida	Serpulidae	Filograna	Filograna implexa	Berkeley, 1835	Filograna implexa Berkeley, 1835
454	MIB	Adriatic Sea	Otranto	40.1288590	18.520781	Annelida	Polychaeta	Sabellida	Serpulidae	Filogranula	Filogranula annulata	(O. G. Costa, 1861)	Filogranula annulata (O. G. Costa, 1861)
454	MIB	Ionian Sea	Santa Maria di Leuca	39.73114575	18.347193	Annelida	Polychaeta	Sabellida	Serpulidae	Filogranula	Filogranula annulata	(O. G. Costa, 1861)	Filogranula annulata (O. G. Costa, 1861)
454	MAB	Adriatic Sea	Monopoli	40.98221667	17.28620278	Annelida	Polychaeta	Sabellida	Serpulidae	Filogranula	Filogranula annulata	(O. G. Costa, 1861)	Filogranula annulata (O. G. Costa, 1861)
455	MIB	Adriatic Sea	Otranto	40.1288590	18.520781	Annelida	Polychaeta	Sabellida	Serpulidae	Filogranula	Filogranula calyculata	(O. G. Costa, 1861)	Filogranula calyculata (O. G. Costa, 1861)
455	MIB	Ionian Sea	Santa Maria di Leuca	39.73114575	18.347193	Annelida	Polychaeta	Sabellida	Serpulidae	Filogranula	Filogranula calyculata	(O. G. Costa, 1861)	Filogranula calyculata (O. G. Costa, 1861)
455	MAB	Adriatic Sea	Monopoli	40.98221667	17.28620278	Annelida	Polychaeta	Sabellida	Serpulidae	Filogranula	Filogranula calyculata	(O. G. Costa, 1861)	Filogranula calyculata (O. G. Costa, 1861)
456	MIB	Ionian Sea	Santa Maria di Leuca	39.73114575	18.347193	Annelida	Polychaeta	Sabellida	Serpulidae	Filogranula	Filogranula gracilis	Langerhans, 1884	Filogranula gracilis Langerhans, 1884
456	MIB	Adriatic Sea	Monopoli	40.98221667	17.28620278	Annelida	Polychaeta	Sabellida	Serpulidae	Filogranula	Filogranula gracilis	Langerhans, 1884	Filogranula gracilis Langerhans, 1884
457	MAB	Adriatic Sea	Otranto	40.12885900	18.520781	Annelida	Polychaeta	Sabellida	Serpulidae	Hydroides	Hydroides nigra	Zibrowius, 1971	Hydroides nigra Zibrowius, 1971
457	MAB	Adriatic Sea	San Foca	40.32417820	18.46629286	Annelida	Polychaeta	Sabellida	Serpulidae	Hydroides	Hydroides nigra	Zibrowius, 1971	Hydroides nigra Zibrowius, 1971
458	MIB	Adriatic Sea	Otranto	40.1288590	18.520781	Annelida	Polychaeta	Sabellida	Serpulidae	Hydroides	Hydroides pseudouncinata	Zibrowius, 1968	Hydroides pseudouncinata Zibrowius, 1968
458	MIB	Adriatic Sea	Monopoli	40.98221667	17.28620278	Annelida	Polychaeta	Sabellida	Serpulidae	Hydroides	Hydroides pseudouncinata	Zibrowius, 1968	Hydroides pseudouncinata Zibrowius, 1968
458	MIB	Adriatic Sea	San Foca	40.3241782	18.4662928	Annelida	Polychaeta	Sabellida	Serpulidae	Hydroides	Hydroides pseudouncinata	Zibrowius, 1968	Hydroides pseudouncinata Zibrowius, 1968
458	MAB	Adriatic Sea	Monopoli	40.98221667	17.28620278	Annelida	Polychaeta	Sabellida	Serpulidae	Hydroides	Hydroides pseudouncinata	Zibrowius, 1968	Hydroides pseudouncinata Zibrowius, 1968
458	MAB	Adriatic Sea	Capitolo	40.94719344	17.449318	Annelida	Polychaeta	Sabellida	Serpulidae	Hydroides	Hydroides pseudouncinata	Zibrowius, 1968	Hydroides pseudouncinata Zibrowius, 1968
458	MAB	Adriatic Sea	Tremiti	42.1382530	15.52244	Annelida	Polychaeta	Sabellida	Serpulidae	Hydroides	Hydroides pseudouncinata	Zibrowius, 1968	Hydroides pseudouncinata Zibrowius, 1968
458	MAB	Adriatic Sea	San Foca	40.32417820	18.46629286	Annelida	Polychaeta	Sabellida	Serpulidae	Hydroides	Hydroides pseudouncinata	Zibrowius, 1968	Hydroides pseudouncinata Zibrowius, 1968
458	MAB	Adriatic Sea	Otranto	40.12885900	18.520781	Annelida	Polychaeta	Sabellida	Serpulidae	Hydroides	Hydroides pseudouncinata	Zibrowius, 1968	Hydroides pseudouncinata Zibrowius, 1968
458	MAB	Ionian Sea	Santa Maria di Leuca	39.73114575	18.347193	Annelida	Polychaeta	Sabellida	Serpulidae	Hydroides	Hydroides pseudouncinata	Zibrowius, 1968	Hydroides pseudouncinata Zibrowius, 1968
459	MIB	Ionian Sea	Santa Maria di Leuca	39.73114575	18.347193	Annelida	Polychaeta	Sabellida	Serpulidae	Janita	Janita fimbriata	(Delle Chiaje, 1822)	Janita fimbriata (Delle Chiaje, 1822)
459	MIB	Adriatic Sea	Monopoli	40.98221667	17.28620278	Annelida	Polychaeta	Sabellida	Serpulidae	Janita	Janita fimbriata	(Delle Chiaje, 1822)	Janita fimbriata (Delle Chiaje, 1822)
460	MIB	Adriatic Sea	Otranto	40.1288590	18.520781	Annelida	Polychaeta	Sabellida	Serpulidae	Janua	Janua heterostropha	(Montagu, 1803)	Janua heterostropha (Montagu, 1803)
460	MIB	Ionian Sea	Santa Maria di Leuca	39.73114575	18.347193	Annelida	Polychaeta	Sabellida	Serpulidae	Janua	Janua heterostropha	(Montagu, 1803)	Janua heterostropha (Montagu, 1803)
461	MIB	Adriatic Sea	Otranto	40.1288590	18.520781	Annelida	Polychaeta	Sabellida	Serpulidae	Josephella	Josephella marenzelleri	Caullery & Mesnil, 1896	Josephella marenzelleri Caullery & Mesnil, 1896
461	MIB	Ionian Sea	Santa Maria di Leuca	39.73114575	18.347193	Annelida	Polychaeta	Sabellida	Serpulidae	Josephella	Josephella marenzelleri	Caullery & Mesnil, 1896	Josephella marenzelleri Caullery & Mesnil, 1896
461	MAB	Adriatic Sea	Monopoli	40.98221667	17.28620278	Annelida	Polychaeta	Sabellida	Serpulidae	Josephella	Josephella marenzelleri	Caullery & Mesnil, 1896	Josephella marenzelleri Caullery & Mesnil, 1896
461	MAB	Adriatic Sea	San Foca	40.32417820	18.46629286	Annelida	Polychaeta	Sabellida	Serpulidae	Josephella	Josephella marenzelleri	Caullery & Mesnil, 1896	Josephella marenzelleri Caullery & Mesnil, 1896
461	MAB	Ionian Sea	Santa Maria di Leuca	39.73114575	18.347193	Annelida	Polychaeta	Sabellida	Serpulidae	Josephella	Josephella marenzelleri	Caullery & Mesnil, 1896	Josephella marenzelleri Caullery & Mesnil, 1896
462	MIB	Adriatic Sea	Otranto	40.1288590	18.520781	Annelida	Polychaeta	Sabellida	Serpulidae	Metavermilia	Metavermilia multicristata	(Philippi, 1844)	Metavermilia multicristata (Philippi, 1844)
462	MIB	Ionian Sea	Santa Maria di Leuca	39.73114575	18.347193	Annelida	Polychaeta	Sabellida	Serpulidae	Metavermilia	Metavermilia multicristata	(Philippi, 1844)	Metavermilia multicristata (Philippi, 1844)
462	MIB	Adriatic Sea	Monopoli	40.98221667	17.28620278	Annelida	Polychaeta	Sabellida	Serpulidae	Metavermilia	Metavermilia multicristata	(Philippi, 1844)	Metavermilia multicristata (Philippi, 1844)
463	MIB	Adriatic Sea	Otranto	40.1288590	18.520781	Annelida	Polychaeta	Sabellida	Serpulidae	Neodexiospira	Neodexiospira pseudocorrugata	(Bush, 1905)	Neodexiospira pseudocorrugata (Bush, 1905)
463	MIB	Ionian Sea	Santa Maria di Leuca	39.73114575	18.347193	Annelida	Polychaeta	Sabellida	Serpulidae	Neodexiospira	Neodexiospira pseudocorrugata	(Bush, 1905)	Neodexiospira pseudocorrugata (Bush, 1905)
464	MIB	Adriatic Sea	Otranto	40.1288590	18.520781	Annelida	Polychaeta	Sabellida	Serpulidae	Nidificaria	Nidificaria clavus	(Harris, 1968)	Nidificaria clavus (Harris, 1968)
465	MIB	Ionian Sea	Santa Maria di Leuca	39.73114575	18.347193	Annelida	Polychaeta	Sabellida	Serpulidae	Pileolaria	Pileolaria heteropoma	(Zibrowius, 1968)	Pileolaria heteropoma (Zibrowius, 1968)
466	MIB	Adriatic Sea	Otranto	40.1288590	18.520781	Annelida	Polychaeta	Sabellida	Serpulidae	Pileolaria	Pileolaria militaris	Claparde, 1870	Pileolaria militaris Claparde, 1870
466	MIB	Ionian Sea	Santa Maria di Leuca	39.73114575	18.347193	Annelida	Polychaeta	Sabellida	Serpulidae	Pileolaria	Pileolaria militaris	Claparde, 1870	Pileolaria militaris Claparde, 1870
467	MIB	Adriatic Sea	Otranto	40.1288590	18.520781	Annelida	Polychaeta	Sabellida	Serpulidae	Placostegus	Placostegus crystallinus	(non Scacchi, 1836) sensu Zibrowius, 1968	Placostegus crystallinus (non Scacchi, 1836) sensu Zibrowius, 1968
467	MIB	Ionian Sea	Santa Maria di Leuca	39.73114575	18.347193	Annelida	Polychaeta	Sabellida	Serpulidae	Placostegus	Placostegus crystallinus	(non Scacchi, 1836) sensu Zibrowius, 1968	Placostegus crystallinus (non Scacchi, 1836) sensu Zibrowius, 1968
467	MIB	Adriatic Sea	Monopoli	40.98221667	17.28620278	Annelida	Polychaeta	Sabellida	Serpulidae	Placostegus	Placostegus crystallinus	(non Scacchi, 1836) sensu Zibrowius, 1968	Placostegus crystallinus (non Scacchi, 1836) sensu Zibrowius, 1968
467	MAB	Adriatic Sea	Monopoli	40.98221667	17.28620278	Annelida	Polychaeta	Sabellida	Serpulidae	Placostegus	Placostegus crystallinus	(non Scacchi, 1836) sensu Zibrowius, 1968	Placostegus crystallinus (non Scacchi, 1836) sensu Zibrowius, 1968
467	MAB	Adriatic Sea	San Foca	40.32417820	18.46629286	Annelida	Polychaeta	Sabellida	Serpulidae	Placostegus	Placostegus crystallinus	(non Scacchi, 1836) sensu Zibrowius, 1968	Placostegus crystallinus (non Scacchi, 1836) sensu Zibrowius, 1968
468	MIB	Adriatic Sea	Otranto	40.1288590	18.520781	Annelida	Polychaeta	Sabellida	Serpulidae	Placostegus	Placostegus tridentatus	(Fabricius, 1779)	Placostegus tridentatus (Fabricius, 1779)
468	MIB	Ionian Sea	Santa Maria di Leuca	39.73114575	18.347193	Annelida	Polychaeta	Sabellida	Serpulidae	Placostegus	Placostegus tridentatus	(Fabricius, 1779)	Placostegus tridentatus (Fabricius, 1779)
469	MIB	Adriatic Sea	Otranto	40.1288590	18.520781	Annelida	Polychaeta	Sabellida	Serpulidae	Protolaeospira	Protolaeospira (Protolaeospira) striata	(Quivreux, 1963)	Protolaeospira (Protolaeospira) striata (Quivreux, 1963)
469	MIB	Ionian Sea	Santa Maria di Leuca	39.73114575	18.347193	Annelida	Polychaeta	Sabellida	Serpulidae	Protolaeospira	Protolaeospira (Protolaeospira) striata	(Quivreux, 1963)	Protolaeospira (Protolaeospira) striata (Quivreux, 1963)
470	MIB	Adriatic Sea	Otranto	40.1288590	18.520781	Annelida	Polychaeta	Sabellida	Serpulidae	Protula	Protula tubularia	(Montagu, 1803)	Protula tubularia (Montagu, 1803)
470	MIB	Ionian Sea	Santa Maria di Leuca	39.73114575	18.347193	Annelida	Polychaeta	Sabellida	Serpulidae	Protula	Protula tubularia	(Montagu, 1803)	Protula tubularia (Montagu, 1803)
470	MIB	Adriatic Sea	San Foca	40.3241782	18.4662928	Annelida	Polychaeta	Sabellida	Serpulidae	Protula	Protula tubularia	(Montagu, 1803)	Protula tubularia (Montagu, 1803)
471	MIB	Adriatic Sea	Otranto	40.1288590	18.520781	Annelida	Polychaeta	Sabellida	Serpulidae	Semivermilia	Semivermilia agglutinata	(Marenzeller, 1893)	Semivermilia agglutinata (Marenzeller, 1893)
471	MIB	Ionian Sea	Santa Maria di Leuca	39.73114575	18.347193	Annelida	Polychaeta	Sabellida	Serpulidae	Semivermilia	Semivermilia agglutinata	(Marenzeller, 1893)	Semivermilia agglutinata (Marenzeller, 1893)
472	MIB	Adriatic Sea	Otranto	40.1288590	18.520781	Annelida	Polychaeta	Sabellida	Serpulidae	Semivermilia	Semivermilia crenata	(O. G. Costa, 1861)	Semivermilia crenata (O. G. Costa, 1861)
472	MIB	Ionian Sea	Santa Maria di Leuca	39.73114575	18.347193	Annelida	Polychaeta	Sabellida	Serpulidae	Semivermilia	Semivermilia crenata	(O. G. Costa, 1861)	Semivermilia crenata (O. G. Costa, 1861)
472	MIB	Adriatic Sea	Monopoli	40.98221667	17.28620278	Annelida	Polychaeta	Sabellida	Serpulidae	Semivermilia	Semivermilia crenata	(O. G. Costa, 1861)	Semivermilia crenata (O. G. Costa, 1861)
472	MAB	Adriatic Sea	Monopoli	40.98221667	17.28620278	Annelida	Polychaeta	Sabellida	Serpulidae	Semivermilia	Semivermilia crenata	(O. G. Costa, 1861)	Semivermilia crenata (O. G. Costa, 1861)
473	MIB	Adriatic Sea	Otranto	40.1288590	18.520781	Annelida	Polychaeta	Sabellida	Serpulidae	Semivermilia	Semivermilia cribrata	(O. G. Costa, 1861)	Semivermilia cribrata (O. G. Costa, 1861)
473	MIB	Ionian Sea	Santa Maria di Leuca	39.73114575	18.347193	Annelida	Polychaeta	Sabellida	Serpulidae	Semivermilia	Semivermilia cribrata	(O. G. Costa, 1861)	Semivermilia cribrata (O. G. Costa, 1861)
474	MIB	Adriatic Sea	Otranto	40.1288590	18.520781	Annelida	Polychaeta	Sabellida	Serpulidae	Semivermilia	Semivermilia pomatostegoides	(Zibrowius, 1969)	Semivermilia pomatostegoides (Zibrowius, 1969)
474	MIB	Ionian Sea	Santa Maria di Leuca	39.73114575	18.347193	Annelida	Polychaeta	Sabellida	Serpulidae	Semivermilia	Semivermilia pomatostegoides	(Zibrowius, 1969)	Semivermilia pomatostegoides (Zibrowius, 1969)
475	MIB	Adriatic Sea	Otranto	40.1288590	18.520781	Annelida	Polychaeta	Sabellida	Serpulidae	Serpula	Serpula cavernicola	Fassari & Mollica, 1991	Serpula cavernicola Fassari & Mollica, 1991
475	MIB	Ionian Sea	Santa Maria di Leuca	39.73114575	18.347193	Annelida	Polychaeta	Sabellida	Serpulidae	Serpula	Serpula cavernicola	Fassari & Mollica, 1991	Serpula cavernicola Fassari & Mollica, 1991
475	MIB	Adriatic Sea	Monopoli	40.98221667	17.28620278	Annelida	Polychaeta	Sabellida	Serpulidae	Serpula	Serpula cavernicola	Fassari & Mollica, 1991	Serpula cavernicola Fassari & Mollica, 1991
476	MIB	Adriatic Sea	Otranto	40.1288590	18.520781	Annelida	Polychaeta	Sabellida	Serpulidae	Serpula	Serpula concharum	Langerhans, 1880	Serpula concharum Langerhans, 1880
476	MIB	Ionian Sea	Santa Maria di Leuca	39.73114575	18.347193	Annelida	Polychaeta	Sabellida	Serpulidae	Serpula	Serpula concharum	Langerhans, 1880	Serpula concharum Langerhans, 1880
476	MIB	Adriatic Sea	Monopoli	40.98221667	17.28620278	Annelida	Polychaeta	Sabellida	Serpulidae	Serpula	Serpula concharum	Langerhans, 1880	Serpula concharum Langerhans, 1880
476	MIB	Adriatic Sea	San Foca	40.3241782	18.4662928	Annelida	Polychaeta	Sabellida	Serpulidae	Serpula	Serpula concharum	Langerhans, 1880	Serpula concharum Langerhans, 1880
476	MAB	Ionian Sea	Santa Maria di Leuca	39.73114575	18.347193	Annelida	Polychaeta	Sabellida	Serpulidae	Serpula	Serpula concharum	Langerhans, 1880	Serpula concharum Langerhans, 1880
476	MAB	Adriatic Sea	Monopoli	40.98221667	17.28620278	Annelida	Polychaeta	Sabellida	Serpulidae	Serpula	Serpula concharum	Langerhans, 1880	Serpula concharum Langerhans, 1880
476	MAB	Adriatic Sea	Tremiti	42.1382530	15.52244	Annelida	Polychaeta	Sabellida	Serpulidae	Serpula	Serpula concharum	Langerhans, 1880	Serpula concharum Langerhans, 1880
476	MAB	Adriatic Sea	San Foca	40.32417820	18.46629286	Annelida	Polychaeta	Sabellida	Serpulidae	Serpula	Serpula concharum	Langerhans, 1880	Serpula concharum Langerhans, 1880
477	MIB	Ionian Sea	Santa Maria di Leuca	39.73114575	18.347193	Annelida	Polychaeta	Sabellida	Serpulidae	Serpula	Serpula israelitica	Amoureux, 1977	Serpula israelitica Amoureux, 1977
478	MIB	Adriatic Sea	Otranto	40.1288590	18.520781	Annelida	Polychaeta	Sabellida	Serpulidae	Serpula	Serpula lobiancoi	Rioja, 1917	Serpula lobiancoi Rioja, 1917
478	MIB	Ionian Sea	Santa Maria di Leuca	39.73114575	18.347193	Annelida	Polychaeta	Sabellida	Serpulidae	Serpula	Serpula lobiancoi	Rioja, 1917	Serpula lobiancoi Rioja, 1917
478	MIB	Adriatic Sea	Capitolo	40.94719344	17.449318	Annelida	Polychaeta	Sabellida	Serpulidae	Serpula	Serpula lobiancoi	Rioja, 1917	Serpula lobiancoi Rioja, 1917
478	MIB	Adriatic Sea	Monopoli	40.98221667	17.28620278	Annelida	Polychaeta	Sabellida	Serpulidae	Serpula	Serpula lobiancoi	Rioja, 1917	Serpula lobiancoi Rioja, 1917
479	MIB	Adriatic Sea	Otranto	40.1288590	18.520781	Annelida	Polychaeta	Sabellida	Serpulidae	Serpula	Serpula vermicularis	Linnaeus, 1767	Serpula vermicularis Linnaeus, 1767
479	MIB	Ionian Sea	Santa Maria di Leuca	39.73114575	18.347193	Annelida	Polychaeta	Sabellida	Serpulidae	Serpula	Serpula vermicularis	Linnaeus, 1767	Serpula vermicularis Linnaeus, 1767
479	MIB	Adriatic Sea	Monopoli	40.98221667	17.28620278	Annelida	Polychaeta	Sabellida	Serpulidae	Serpula	Serpula vermicularis	Linnaeus, 1767	Serpula vermicularis Linnaeus, 1767
479	MIB	Adriatic Sea	Capitolo	40.94719344	17.449318	Annelida	Polychaeta	Sabellida	Serpulidae	Serpula	Serpula vermicularis	Linnaeus, 1767	Serpula vermicularis Linnaeus, 1767
479	MIB	Adriatic Sea	Tremiti	42.13825300	15.522442	Annelida	Polychaeta	Sabellida	Serpulidae	Serpula	Serpula vermicularis	Linnaeus, 1767	Serpula vermicularis Linnaeus, 1767
479	MIB	Adriatic Sea	San Foca	40.3241782	18.4662928	Annelida	Polychaeta	Sabellida	Serpulidae	Serpula	Serpula vermicularis	Linnaeus, 1767	Serpula vermicularis Linnaeus, 1767
479	MAB	Adriatic Sea	Monopoli	40.98221667	17.28620278	Annelida	Polychaeta	Sabellida	Serpulidae	Serpula	Serpula vermicularis	Linnaeus, 1767	Serpula vermicularis Linnaeus, 1767
479	MAB	Adriatic Sea	Capitolo	40.94719344	17.449318	Annelida	Polychaeta	Sabellida	Serpulidae	Serpula	Serpula vermicularis	Linnaeus, 1767	Serpula vermicularis Linnaeus, 1767
479	MAB	Adriatic Sea	Tremiti	42.1382530	15.52244	Annelida	Polychaeta	Sabellida	Serpulidae	Serpula	Serpula vermicularis	Linnaeus, 1767	Serpula vermicularis Linnaeus, 1767
479	MAB	Adriatic Sea	Otranto	40.12885900	18.520781	Annelida	Polychaeta	Sabellida	Serpulidae	Serpula	Serpula vermicularis	Linnaeus, 1767	Serpula vermicularis Linnaeus, 1767
480	MIB	Adriatic Sea	San Foca	40.3241782	18.4662928	Annelida	Polychaeta	Sabellida	Serpulidae	Serpula	Serpula	Linnaeus, 1758	Serpula Linnaeus, 1758
480	MIB	Adriatic Sea	Monopoli	40.98221667	17.28620278	Annelida	Polychaeta	Sabellida	Serpulidae	Serpula	Serpula	Linnaeus, 1758	Serpula Linnaeus, 1758
480	MAB	Adriatic Sea	Otranto	40.12885900	18.520781	Annelida	Polychaeta	Sabellida	Serpulidae	Serpula	Serpula	Linnaeus, 1758	Serpula Linnaeus, 1758
480	MAB	Adriatic Sea	Tremiti	42.1382530	15.52244	Annelida	Polychaeta	Sabellida	Serpulidae	Serpula	Serpula	Linnaeus, 1758	Serpula Linnaeus, 1758
480	MAB	Adriatic Sea	Monopoli	40.98221667	17.28620278	Annelida	Polychaeta	Sabellida	Serpulidae	Serpula	Serpula	Linnaeus, 1758	Serpula Linnaeus, 1758
481	MIB	Adriatic Sea	Otranto	40.1288590	18.520781	Annelida	Polychaeta	Sabellida	Serpulidae	Spiraserpula	Spiraserpula massiliensis	(Zibrowius, 1968)	Spiraserpula massiliensis (Zibrowius, 1968)
481	MIB	Ionian Sea	Santa Maria di Leuca	39.73114575	18.347193	Annelida	Polychaeta	Sabellida	Serpulidae	Spiraserpula	Spiraserpula massiliensis	(Zibrowius, 1968)	Spiraserpula massiliensis (Zibrowius, 1968)
481	MIB	Adriatic Sea	Monopoli	40.98221667	17.28620278	Annelida	Polychaeta	Sabellida	Serpulidae	Spiraserpula	Spiraserpula massiliensis	(Zibrowius, 1968)	Spiraserpula massiliensis (Zibrowius, 1968)
482	MIB	Ionian Sea	Santa Maria di Leuca	39.73114575	18.347193	Annelida	Polychaeta	Sabellida	Serpulidae	Spirobranchus	Spirobranchus lima	(Grube, 1862)	Spirobranchus lima (Grube, 1862)
483	MIB	Ionian Sea	Santa Maria di Leuca	39.73114575	18.347193	Annelida	Polychaeta	Sabellida	Serpulidae	Spirobranchus	Spirobranchus polytrema	(Philippi, 1844)	Spirobranchus polytrema (Philippi, 1844)
484	MIB	Adriatic Sea	Otranto	40.1288590	18.520781	Annelida	Polychaeta	Sabellida	Serpulidae	Spirobranchus	Spirobranchus triqueter	(Linnaeus, 1758)	Spirobranchus triqueter (Linnaeus, 1758)
484	MIB	Ionian Sea	Santa Maria di Leuca	39.73114575	18.347193	Annelida	Polychaeta	Sabellida	Serpulidae	Spirobranchus	Spirobranchus triqueter	(Linnaeus, 1758)	Spirobranchus triqueter (Linnaeus, 1758)
484	MIB	Adriatic Sea	Monopoli	40.98221667	17.28620278	Annelida	Polychaeta	Sabellida	Serpulidae	Spirobranchus	Spirobranchus triqueter	(Linnaeus, 1758)	Spirobranchus triqueter (Linnaeus, 1758)
484	MIB	Adriatic Sea	Tremiti	42.13825300	15.522442	Annelida	Polychaeta	Sabellida	Serpulidae	Spirobranchus	Spirobranchus triqueter	(Linnaeus, 1758)	Spirobranchus triqueter (Linnaeus, 1758)
484	MIB	Adriatic Sea	San Foca	40.3241782	18.4662928	Annelida	Polychaeta	Sabellida	Serpulidae	Spirobranchus	Spirobranchus triqueter	(Linnaeus, 1758)	Spirobranchus triqueter (Linnaeus, 1758)
484	MAB	Adriatic Sea	Monopoli	40.98221667	17.28620278	Annelida	Polychaeta	Sabellida	Serpulidae	Spirobranchus	Spirobranchus triqueter	(Linnaeus, 1758)	Spirobranchus triqueter (Linnaeus, 1758)
484	MAB	Adriatic Sea	Capitolo	40.94719344	17.449318	Annelida	Polychaeta	Sabellida	Serpulidae	Spirobranchus	Spirobranchus triqueter	(Linnaeus, 1758)	Spirobranchus triqueter (Linnaeus, 1758)
484	MAB	Adriatic Sea	Tremiti	42.1382530	15.52244	Annelida	Polychaeta	Sabellida	Serpulidae	Spirobranchus	Spirobranchus triqueter	(Linnaeus, 1758)	Spirobranchus triqueter (Linnaeus, 1758)
484	MAB	Adriatic Sea	San Foca	40.32417820	18.46629286	Annelida	Polychaeta	Sabellida	Serpulidae	Spirobranchus	Spirobranchus triqueter	(Linnaeus, 1758)	Spirobranchus triqueter (Linnaeus, 1758)
484	MAB	Adriatic Sea	Otranto	40.12885900	18.520781	Annelida	Polychaeta	Sabellida	Serpulidae	Spirobranchus	Spirobranchus triqueter	(Linnaeus, 1758)	Spirobranchus triqueter (Linnaeus, 1758)
484	MAB	Ionian Sea	Santa Maria di Leuca	39.73114575	18.347193	Annelida	Polychaeta	Sabellida	Serpulidae	Spirobranchus	Spirobranchus triqueter	(Linnaeus, 1758)	Spirobranchus triqueter (Linnaeus, 1758)
485	MIB	Ionian Sea	Santa Maria di Leuca	39.73114575	18.347193	Annelida	Polychaeta	Sabellida	Serpulidae	Spirorbis	Spirorbis (Spirorbis) cuneatus	Gee, 1964	Spirorbis (Spirorbis) cuneatus Gee, 1964
486	MIB	Adriatic Sea	Otranto	40.1288590	18.520781	Annelida	Polychaeta	Sabellida	Serpulidae	Spirorbis	Spirorbis (Spirorbis) marioni	Caullery & Mesnil, 1897	Spirorbis marioni Caullery & Mesnil, 1897
486	MIB	Ionian Sea	Santa Maria di Leuca	39.73114575	18.347193	Annelida	Polychaeta	Sabellida	Serpulidae	Spirorbis	Spirorbis (Spirorbis) marioni	Caullery & Mesnil, 1897	Spirorbis marioni Caullery & Mesnil, 1897
487	MIB	Adriatic Sea	Otranto	40.1288590	18.520781	Annelida	Polychaeta	Sabellida	Serpulidae	Vermiliopsis	Vermiliopsis infundibulum	(Philippi, 1844)	Vermiliopsis infundibulum (Philippi, 1844)
487	MIB	Ionian Sea	Santa Maria di Leuca	39.73114575	18.347193	Annelida	Polychaeta	Sabellida	Serpulidae	Vermiliopsis	Vermiliopsis infundibulum	(Philippi, 1844)	Vermiliopsis infundibulum (Philippi, 1844)
487	MIB	Adriatic Sea	Monopoli	40.98221667	17.28620278	Annelida	Polychaeta	Sabellida	Serpulidae	Vermiliopsis	Vermiliopsis infundibulum	(Philippi, 1844)	Vermiliopsis infundibulum (Philippi, 1844)
487	MIB	Adriatic Sea	Capitolo	40.94719344	17.449318	Annelida	Polychaeta	Sabellida	Serpulidae	Vermiliopsis	Vermiliopsis infundibulum	(Philippi, 1844)	Vermiliopsis infundibulum (Philippi, 1844)
487	MIB	Adriatic Sea	San Foca	40.3241782	18.4662928	Annelida	Polychaeta	Sabellida	Serpulidae	Vermiliopsis	Vermiliopsis infundibulum	(Philippi, 1844)	Vermiliopsis infundibulum (Philippi, 1844)
487	MAB	Adriatic Sea	Monopoli	40.98221667	17.28620278	Annelida	Polychaeta	Sabellida	Serpulidae	Vermiliopsis	Vermiliopsis infundibulum	(Philippi, 1844)	Vermiliopsis infundibulum (Philippi, 1844)
487	MAB	Adriatic Sea	Capitolo	40.94719344	17.449318	Annelida	Polychaeta	Sabellida	Serpulidae	Vermiliopsis	Vermiliopsis infundibulum	(Philippi, 1844)	Vermiliopsis infundibulum (Philippi, 1844)
487	MAB	Adriatic Sea	Tremiti	42.1382530	15.52244	Annelida	Polychaeta	Sabellida	Serpulidae	Vermiliopsis	Vermiliopsis infundibulum	(Philippi, 1844)	Vermiliopsis infundibulum (Philippi, 1844)
487	MAB	Adriatic Sea	San Foca	40.32417820	18.46629286	Annelida	Polychaeta	Sabellida	Serpulidae	Vermiliopsis	Vermiliopsis infundibulum	(Philippi, 1844)	Vermiliopsis infundibulum (Philippi, 1844)
488	MIB	Ionian Sea	Santa Maria di Leuca	39.73114575	18.347193	Annelida	Polychaeta	Sabellida	Serpulidae	Vermiliopsis	Vermiliopsis labiata	(O. G. Costa, 1861)	Vermiliopsis labiata (O. G. Costa, 1861)
488	MIB	Adriatic Sea	Otranto	40.1288590	18.520781	Annelida	Polychaeta	Sabellida	Serpulidae	Vermiliopsis	Vermiliopsis labiata	(O. G. Costa, 1861)	Vermiliopsis labiata (O. G. Costa, 1861)
488	MIB	Adriatic Sea	Monopoli	40.98221667	17.28620278	Annelida	Polychaeta	Sabellida	Serpulidae	Vermiliopsis	Vermiliopsis labiata	(O. G. Costa, 1861)	Vermiliopsis labiata (O. G. Costa, 1861)
488	MIB	Adriatic Sea	San Foca	40.3241782	18.4662928	Annelida	Polychaeta	Sabellida	Serpulidae	Vermiliopsis	Vermiliopsis labiata	(O. G. Costa, 1861)	Vermiliopsis labiata (O. G. Costa, 1861)
488	MAB	Adriatic Sea	Monopoli	40.98221667	17.28620278	Annelida	Polychaeta	Sabellida	Serpulidae	Vermiliopsis	Vermiliopsis labiata	(O. G. Costa, 1861)	Vermiliopsis labiata (O. G. Costa, 1861)
488	MAB	Adriatic Sea	Capitolo	40.94719344	17.449318	Annelida	Polychaeta	Sabellida	Serpulidae	Vermiliopsis	Vermiliopsis labiata	(O. G. Costa, 1861)	Vermiliopsis labiata (O. G. Costa, 1861)
488	MAB	Adriatic Sea	San Foca	40.32417820	18.46629286	Annelida	Polychaeta	Sabellida	Serpulidae	Vermiliopsis	Vermiliopsis labiata	(O. G. Costa, 1861)	Vermiliopsis labiata (O. G. Costa, 1861)
489	MIB	Ionian Sea	Santa Maria di Leuca	39.73114575	18.347193	Annelida	Polychaeta	Sabellida	Serpulidae	Vermiliopsis	Vermiliopsis monodiscus	Zibrowius, 1968	Vermiliopsis monodiscus Zibrowius, 1968
489	MIB	Adriatic Sea	Monopoli	40.98221667	17.28620278	Annelida	Polychaeta	Sabellida	Serpulidae	Vermiliopsis	Vermiliopsis monodiscus	Zibrowius, 1968	Vermiliopsis monodiscus Zibrowius, 1968
489	MAB	Adriatic Sea	Monopoli	40.98221667	17.28620278	Annelida	Polychaeta	Sabellida	Serpulidae	Vermiliopsis	Vermiliopsis monodiscus	Zibrowius, 1968	Vermiliopsis monodiscus Zibrowius, 1968
490	MIB	Adriatic Sea	Otranto	40.1288590	18.520781	Annelida	Polychaeta	Sabellida	Serpulidae	Vermiliopsis	Vermiliopsis striaticeps	(Grube, 1862)	Vermiliopsis striaticeps (Grube, 1862)
490	MIB	Ionian Sea	Santa Maria di Leuca	39.73114575	18.347193	Annelida	Polychaeta	Sabellida	Serpulidae	Vermiliopsis	Vermiliopsis striaticeps	(Grube, 1862)	Vermiliopsis striaticeps (Grube, 1862)
490	MIB	Adriatic Sea	Monopoli	40.98221667	17.28620278	Annelida	Polychaeta	Sabellida	Serpulidae	Vermiliopsis	Vermiliopsis striaticeps	(Grube, 1862)	Vermiliopsis striaticeps (Grube, 1862)
490	MAB	Adriatic Sea	Capitolo	40.94719344	17.449318	Annelida	Polychaeta	Sabellida	Serpulidae	Vermiliopsis	Vermiliopsis striaticeps	(Grube, 1862)	Vermiliopsis striaticeps (Grube, 1862)
491	MIB	Ionian Sea	Santa Maria di Leuca	39.73114575	18.347193	Annelida	Polychaeta	Sabellida	Serpulidae	Vinearia	Vinearia koehleri	(Caullery & Mesnil, 1897)	Vinearia koehleri (Caullery & Mesnil, 1897)
492	MIB	Ionian Sea	Monopoli	40.98221667	17.28620278	Annelida	Polychaeta	Spionida	Spionidae	Spiophanes	Spiophanes adriaticus	D'Alessandro, Castriota, et al, 2020	Spiophanes adriaticus D'Alessandro, Castriota, et al, 2020
493	MIB	Adriatic Sea	Tremiti	42.13825300	15.522442	Annelida	Polychaeta	Terebellida	Cirratulidae	Dodecaceria	Dodecaceria concharum	Orsted, 1843	Dodecaceria concharum Orsted, 1843
493	MIB	Adriatic Sea	San Foca	40.3241782	18.4662928	Annelida	Polychaeta	Terebellida	Cirratulidae	Dodecaceria	Dodecaceria concharum	Orsted, 1843	Dodecaceria concharum Orsted, 1843
493	MAB	Adriatic Sea	San Foca	40.32417820	18.46629286	Annelida	Polychaeta	Terebellida	Cirratulidae	Dodecaceria	Dodecaceria concharum	Orsted, 1843	Dodecaceria concharum Orsted, 1843
494	MAB	Adriatic Sea	San Foca	40.32417820	18.46629286	Annelida	Polychaeta	Terebellida	Flabelligeridae	Stylarioides	Stylarioides grubei	Salazar-Vallejo, 2011	Stylarioides grubei Salazar-Vallejo, 2011
495	MIB	Adriatic Sea	Monopoli	40.98221667	17.28620278	Annelida	Polychaeta	Terebellida	Melinnidae	Melinna	Melinna palmata	Grube, 1870	Melinna palmata Grube, 1870
496	MIB	Adriatic Sea	San Foca	40.3241782	18.4662928	Annelida	Polychaeta	Terebellida	Terebellidae	Amphitrite	Amphitrite rubra	(Risso, 1826)	Amphitrite rubra (Risso, 1826)
496	MAB	Adriatic Sea	Monopoli	40.98221667	17.28620278	Annelida	Polychaeta	Terebellida	Terebellidae	Amphitrite	Amphitrite rubra	(Risso, 1826)	Amphitrite rubra (Risso, 1826)
496	MAB	Adriatic Sea	Capitolo	40.94719344	17.449318	Annelida	Polychaeta	Terebellida	Terebellidae	Amphitrite	Amphitrite rubra	(Risso, 1826)	Amphitrite rubra (Risso, 1826)
496	MAB	Adriatic Sea	Otranto	40.12885900	18.520781	Annelida	Polychaeta	Terebellida	Terebellidae	Amphitrite	Amphitrite rubra	(Risso, 1826)	Amphitrite rubra (Risso, 1826)
496	MAB	Ionian Sea	Santa Maria di Leuca	39.73114575	18.347193	Annelida	Polychaeta	Terebellida	Terebellidae	Amphitrite	Amphitrite rubra	(Risso, 1826)	Amphitrite rubra (Risso, 1826)
497	MIB	Adriatic Sea	San Foca	40.3241782	18.4662928	Annelida	Polychaeta	Terebellida	Terebellidae	Pista	Pista cretacea	(Grube, 1860)	Pista cretacea (Grube, 1860)
498	MIB	Adriatic Sea	Monopoli	40.98221667	17.28620278	Annelida	Polychaeta	Terebellida	Terebellidae	Polymnia	Eupolymnia nebulosa	(Montagu, 1819)	Eupolymnia nebulosa (Montagu, 1819)
499	MAB	Adriatic Sea	San Foca	40.32417820	18.46629286	Annelida	Polychaeta	[unassigned]	Capitellidae	Dasybranchus	Dasybranchus gajolae	Eisig, 1887	Dasybranchus gajolae Eisig, 1887
500	MAB	Adriatic Sea	San Foca	40.32417820	18.46629286	Annelida	Polychaeta	[unassigned]	Capitellidae		Capitellidae		Capitellidae sp.
501	MIB	Adriatic Sea	Tremiti	42.13825300	15.522442	Annelida	Polychaeta	[unassigned]	Capitellidae	Leiochrides	Leiochrides australis	Augener, 1914	Leiochrides australis Augener, 1914
502	MIB	Adriatic Sea	Monopoli	40.98221667	17.28620278	Annelida	Polychaeta	[unassigned]	Paraonidae	Aricidea	Aricidea (Strelzovia) suecica	Eliason, 1920	Aricidea (Strelzovia) suecica Eliason, 1920
503	MIB	Adriatic Sea	Tremiti	42.13825300	15.522442	Annelida	[unassigned]	Sipuncula	Aspidosiphonidae	Aspidosiphon	Aspidosiphon (Aspidosiphon) muelleri muelleri	Diesing, 1851	Aspidosiphon (Aspidosiphon) muelleri muelleri Diesing, 1851
503	MAB	Adriatic Sea	San Foca	40.32417820	18.46629286	Annelida	[unassigned]	Sipuncula	Aspidosiphonidae	Aspidosiphon	Aspidosiphon (Aspidosiphon) muelleri muelleri	Diesing, 1851	Aspidosiphon (Aspidosiphon) muelleri muelleri Diesing, 1851
504	MIB	Adriatic Sea	San Foca	40.3241782	18.4662928	Annelida	[unassigned]	Sipuncula	Golfingiidae	Golfingia	Golfingia (Golfingia) elongata	(Keferstein, 1862)	Golfingia (Golfingia) elongata (Keferstein, 1862)
505	MAB	Adriatic Sea	San Foca	40.32417820	18.46629286	Annelida	[unassigned]	Sipuncula	Golfingiidae	Golfingia	Golfingia (Golfingia) vulgaris vulgaris	(de Blainville, 1827)	Golfingia (Golfingia) vulgaris vulgaris (de Blainville, 1827)
506	MAB	Adriatic Sea	San Foca	40.32417821	18.46629287	Annelida	[unassigned]	Sipuncula	Golfingiidae	Phascolion	Phascolion (Phascolion) strombus	(Montagu, 1804)	Phascolion (Phascolion) strombus strombus (Montagu, 1804)
507	MIB	Adriatic Sea	San Foca	40.3241782	18.4662928	Annelida	[unassigned]	Sipuncula	Phascolosomatidae	Phascolosoma	Phascolosoma (Phascolosoma) granulatum	Leuckart, 1828	Phascolosoma (Phascolosoma) granulatum Leuckart, 1828
507	MAB	Adriatic Sea	San Foca	40.32417820	18.46629286	Annelida	[unassigned]	Sipuncula	Phascolosomatidae	Phascolosoma	Phascolosoma (Phascolosoma) granulatum	Leuckart, 1828	Phascolosoma (Phascolosoma) granulatum Leuckart, 1828
508	MIB	Adriatic Sea	Tremiti	42.13825300	15.522442	Annelida	[unassigned]	Sipuncula	Phascolosomatidae	Phascolosoma	Phascolosoma (Phascolosoma) stephensoni	(Stephen, 1942)	Phascolosoma (Phascolosoma) stephensoni (Stephen, 1942)
509	MAB	Adriatic Sea	Otranto	40.12885900	18.520781	Annelida	[unassigned]	Sipuncula	Sipunculidae		Sipunculidae		Sipunculidae
509	MAB	Ionian Sea	Santa Maria di Leuca	39.73114575	18.347193	Annelida	[unassigned]	Sipuncula	Sipunculidae		Sipunculidae		Sipunculidae
509	MAB	Adriatic Sea	Monopoli	40.98221667	17.28620278	Annelida	[unassigned]	Sipuncula	Sipunculidae		Sipunculidae		Sipunculidae
510	MIB	Adriatic Sea	Monopoli	40.98221667	17.28620278	Bryozoa	Gymnolaemata	Cheilostomatida	Adeonidae	Adeonella	Adeonella calveti	Canu & Bassler, 1930	Adeonella calveti Canu & Bassler, 1930
510	MAB	Adriatic Sea	Otranto	40.12885900	18.520781	Bryozoa	Gymnolaemata	Cheilostomatida	Adeonidae	Adeonella	Adeonella calveti	Canu & Bassler, 1930	Adeonella calveti Canu & Bassler, 1930
511	MAB	Adriatic Sea	San Foca	40.32417820	18.46629286	Bryozoa	Gymnolaemata	Cheilostomatida	Adeonidae	Adeonella	Adeonella polystomella	(Reuss, 1848)	Adeonella polystomella (Reuss, 1848)
512	MAB	Adriatic Sea	Otranto	40.12885900	18.520781	Bryozoa	Gymnolaemata	Cheilostomatida	Adeonidae	Reptadeonella	Reptadeonella violacea	(Johnston, 1847)	Reptadeonella violacea (Johnston, 1847)
512	MAB	Ionian Sea	Santa Maria di Leuca	39.73114575	18.347193	Bryozoa	Gymnolaemata	Cheilostomatida	Adeonidae	Reptadeonella	Reptadeonella violacea	(Johnston, 1847)	Reptadeonella violacea (Johnston, 1847)
512	MAB	Adriatic Sea	Monopoli	40.98221667	17.28620278	Bryozoa	Gymnolaemata	Cheilostomatida	Adeonidae	Reptadeonella	Reptadeonella violacea	(Johnston, 1847)	Reptadeonella violacea (Johnston, 1847)
512	MAB	Adriatic Sea	Capitolo	40.94719344	17.449318	Bryozoa	Gymnolaemata	Cheilostomatida	Adeonidae	Reptadeonella	Reptadeonella violacea	(Johnston, 1847)	Reptadeonella violacea (Johnston, 1847)
512	MAB	Adriatic Sea	San Foca	40.32417820	18.46629286	Bryozoa	Gymnolaemata	Cheilostomatida	Adeonidae	Reptadeonella	Reptadeonella violacea	(Johnston, 1847)	Reptadeonella violacea (Johnston, 1847)
513	MIB	Adriatic Sea	Otranto	40.1288590	18.520781	Bryozoa	Gymnolaemata	Cheilostomatida	Beaniidae	Beania	Beania magellanica	(Busk, 1852)	Beania magellanica (Busk, 1852)
513	MIB	Ionian Sea	Santa Maria di Leuca	39.73114575	18.347193	Bryozoa	Gymnolaemata	Cheilostomatida	Beaniidae	Beania	Beania magellanica	(Busk, 1852)	Beania magellanica (Busk, 1852)
513	MIB	Adriatic Sea	Monopoli	40.98221667	17.28620278	Bryozoa	Gymnolaemata	Cheilostomatida	Beaniidae	Beania	Beania magellanica	(Busk, 1852)	Beania magellanica (Busk, 1852)
513	MIB	Adriatic Sea	Capitolo	40.94719344	17.449318	Bryozoa	Gymnolaemata	Cheilostomatida	Beaniidae	Beania	Beania magellanica	(Busk, 1852)	Beania magellanica (Busk, 1852)
513	MIB	Adriatic Sea	Tremiti	42.13825300	15.522442	Bryozoa	Gymnolaemata	Cheilostomatida	Beaniidae	Beania	Beania magellanica	(Busk, 1852)	Beania magellanica (Busk, 1852)
513	MIB	Adriatic Sea	San Foca	40.3241782	18.4662928	Bryozoa	Gymnolaemata	Cheilostomatida	Beaniidae	Beania	Beania magellanica	(Busk, 1852)	Beania magellanica (Busk, 1852)
513	MAB	Adriatic Sea	Monopoli	40.98221667	17.28620278	Bryozoa	Gymnolaemata	Cheilostomatida	Beaniidae	Beania	Beania magellanica	(Busk, 1852)	Beania magellanica (Busk, 1852)
513	MAB	Adriatic Sea	San Foca	40.32417820	18.46629286	Bryozoa	Gymnolaemata	Cheilostomatida	Beaniidae	Beania	Beania magellanica	(Busk, 1852)	Beania magellanica (Busk, 1852)
514	MIB	Adriatic Sea	Otranto	40.1288590	18.520781	Bryozoa	Gymnolaemata	Cheilostomatida	Bitectiporidae	Pentapora	Pentapora fascialis	(Pallas, 1766)	Pentapora fascialis (Pallas, 1766)
514	MIB	Ionian Sea	Santa Maria di Leuca	39.73114575	18.347193	Bryozoa	Gymnolaemata	Cheilostomatida	Bitectiporidae	Pentapora	Pentapora fascialis	(Pallas, 1766)	Pentapora fascialis (Pallas, 1766)
514	MIB	Adriatic Sea	Monopoli	40.98221667	17.28620278	Bryozoa	Gymnolaemata	Cheilostomatida	Bitectiporidae	Pentapora	Pentapora fascialis	(Pallas, 1766)	Pentapora fascialis (Pallas, 1766)
514	MIB	Adriatic Sea	Tremiti	42.13825300	15.522442	Bryozoa	Gymnolaemata	Cheilostomatida	Bitectiporidae	Pentapora	Pentapora fascialis	(Pallas, 1766)	Pentapora fascialis (Pallas, 1766)
514	MAB	Adriatic Sea	Otranto	40.12885900	18.520781	Bryozoa	Gymnolaemata	Cheilostomatida	Bitectiporidae	Pentapora	Pentapora fascialis	(Pallas, 1766)	Pentapora fascialis (Pallas, 1766)
514	MAB	Adriatic Sea	Monopoli	40.98221667	17.28620278	Bryozoa	Gymnolaemata	Cheilostomatida	Bitectiporidae	Pentapora	Pentapora fascialis	(Pallas, 1766)	Pentapora fascialis (Pallas, 1766)
514	MAB	Adriatic Sea	Capitolo	40.94719344	17.449318	Bryozoa	Gymnolaemata	Cheilostomatida	Bitectiporidae	Pentapora	Pentapora fascialis	(Pallas, 1766)	Pentapora fascialis (Pallas, 1766)
514	MAB	Adriatic Sea	Tremiti	42.1382530	15.52244	Bryozoa	Gymnolaemata	Cheilostomatida	Bitectiporidae	Pentapora	Pentapora fascialis	(Pallas, 1766)	Pentapora fascialis (Pallas, 1766)
514	MAB	Adriatic Sea	San Foca	40.32417820	18.46629286	Bryozoa	Gymnolaemata	Cheilostomatida	Bitectiporidae	Pentapora	Pentapora fascialis	(Pallas, 1766)	Pentapora fascialis (Pallas, 1766)
515	MIB	Adriatic Sea	Otranto	40.1288590	18.520781	Bryozoa	Gymnolaemata	Cheilostomatida	Bitectiporidae	Schizomavella	Schizomavella	Canu & Bassler, 1917	Schizomavella Canu & Bassler, 1917
515	MIB	Ionian Sea	Santa Maria di Leuca	39.73114575	18.347193	Bryozoa	Gymnolaemata	Cheilostomatida	Bitectiporidae	Schizomavella	Schizomavella	Canu & Bassler, 1917	Schizomavella Canu & Bassler, 1917
515	MIB	Adriatic Sea	Monopoli	40.98221667	17.28620278	Bryozoa	Gymnolaemata	Cheilostomatida	Bitectiporidae	Schizomavella	Schizomavella	Canu & Bassler, 1917	Schizomavella Canu & Bassler, 1917
515	MIB	Adriatic Sea	Capitolo	40.94719344	17.449318	Bryozoa	Gymnolaemata	Cheilostomatida	Bitectiporidae	Schizomavella	Schizomavella	Canu & Bassler, 1917	Schizomavella Canu & Bassler, 1917
515	MIB	Adriatic Sea	Tremiti	42.13825300	15.522442	Bryozoa	Gymnolaemata	Cheilostomatida	Bitectiporidae	Schizomavella	Schizomavella	Canu & Bassler, 1917	Schizomavella Canu & Bassler, 1917
515	MIB	Adriatic Sea	San Foca	40.3241782	18.4662928	Bryozoa	Gymnolaemata	Cheilostomatida	Bitectiporidae	Schizomavella	Schizomavella	Canu & Bassler, 1917	Schizomavella Canu & Bassler, 1917
515	MAB	Adriatic Sea	Otranto	40.12885900	18.520781	Bryozoa	Gymnolaemata	Cheilostomatida	Bitectiporidae	Schizomavella	Schizomavella	Canu & Bassler, 1917	Schizomavella Canu & Bassler, 1917
515	MAB	Adriatic Sea	Monopoli	40.98221667	17.28620278	Bryozoa	Gymnolaemata	Cheilostomatida	Bitectiporidae	Schizomavella	Schizomavella	Canu & Bassler, 1917	Schizomavella Canu & Bassler, 1917
515	MAB	Adriatic Sea	Capitolo	40.94719344	17.449318	Bryozoa	Gymnolaemata	Cheilostomatida	Bitectiporidae	Schizomavella	Schizomavella	Canu & Bassler, 1917	Schizomavella Canu & Bassler, 1917
515	MAB	Adriatic Sea	Tremiti	42.1382530	15.52244	Bryozoa	Gymnolaemata	Cheilostomatida	Bitectiporidae	Schizomavella	Schizomavella	Canu & Bassler, 1917	Schizomavella Canu & Bassler, 1917
516	MAB	Adriatic Sea	Capitolo	40.94719344	17.449318	Bryozoa	Gymnolaemata	Cheilostomatida	Bitectiporidae	Schizomavella	Schizomavella (Calvetomavella) discoidea	(Busk, 1859)	Schizomavella (Calvetomavella) discoidea (Busk, 1859)
517	MIB	Adriatic Sea	Otranto	40.1288590	18.520781	Bryozoa	Gymnolaemata	Cheilostomatida	Bitectiporidae	Schizomavella	Schizomavella (Schizomavella) auriculata	(Hassall, 1842)	Schizomavella (Schizomavella) auriculata (Hassall, 1842)
517	MIB	Ionian Sea	Santa Maria di Leuca	39.73114575	18.347193	Bryozoa	Gymnolaemata	Cheilostomatida	Bitectiporidae	Schizomavella	Schizomavella (Schizomavella) auriculata	(Hassall, 1842)	Schizomavella (Schizomavella) auriculata (Hassall, 1842)
517	MIB	Adriatic Sea	Capitolo	40.94719344	17.449318	Bryozoa	Gymnolaemata	Cheilostomatida	Bitectiporidae	Schizomavella	Schizomavella (Schizomavella) auriculata	(Hassall, 1842)	Schizomavella (Schizomavella) auriculata (Hassall, 1842)
517	MIB	Adriatic Sea	San Foca	40.3241782	18.4662928	Bryozoa	Gymnolaemata	Cheilostomatida	Bitectiporidae	Schizomavella	Schizomavella (Schizomavella) auriculata	(Hassall, 1842)	Schizomavella (Schizomavella) auriculata (Hassall, 1842)
517	MAB	Adriatic Sea	Monopoli	40.98221667	17.28620278	Bryozoa	Gymnolaemata	Cheilostomatida	Bitectiporidae	Schizomavella	Schizomavella (Schizomavella) auriculata	(Hassall, 1842)	Schizomavella (Schizomavella) auriculata (Hassall, 1842)
517	MAB	Adriatic Sea	Capitolo	40.94719344	17.449318	Bryozoa	Gymnolaemata	Cheilostomatida	Bitectiporidae	Schizomavella	Schizomavella (Schizomavella) auriculata	(Hassall, 1842)	Schizomavella (Schizomavella) auriculata (Hassall, 1842)
517	MAB	Adriatic Sea	Tremiti	42.1382530	15.52244	Bryozoa	Gymnolaemata	Cheilostomatida	Bitectiporidae	Schizomavella	Schizomavella (Schizomavella) auriculata	(Hassall, 1842)	Schizomavella (Schizomavella) auriculata (Hassall, 1842)
517	MAB	Adriatic Sea	San Foca	40.32417820	18.46629286	Bryozoa	Gymnolaemata	Cheilostomatida	Bitectiporidae	Schizomavella	Schizomavella (Schizomavella) auriculata	(Hassall, 1842)	Schizomavella (Schizomavella) auriculata (Hassall, 1842)
518	MIB	Adriatic Sea	Tremiti	42.13825300	15.522442	Bryozoa	Gymnolaemata	Cheilostomatida	Bitectiporidae	Schizomavella	Schizomavella (Schizomavella) cornuta	(Heller, 1867)	Schizomavella (Schizomavella) cornuta (Heller, 1867)
519	MIB	Adriatic Sea	Monopoli	40.98221667	17.28620278	Bryozoa	Gymnolaemata	Cheilostomatida	Bitectiporidae	Schizomavella	Schizomavella (Schizomavella) mamillata	(Hincks, 1880)	Schizomavella (Schizomavella) mamillata (Hincks, 1880)
519	MIB	Adriatic Sea	Tremiti	42.13825300	15.522442	Bryozoa	Gymnolaemata	Cheilostomatida	Bitectiporidae	Schizomavella	Schizomavella (Schizomavella) mamillata	(Hincks, 1880)	Schizomavella (Schizomavella) mamillata (Hincks, 1880)
519	MAB	Adriatic Sea	Otranto	40.12885900	18.520781	Bryozoa	Gymnolaemata	Cheilostomatida	Bitectiporidae	Schizomavella	Schizomavella (Schizomavella) mamillata	(Hincks, 1880)	Schizomavella (Schizomavella) mamillata (Hincks, 1880)
519	MAB	Ionian Sea	Santa Maria di Leuca	39.73114575	18.347193	Bryozoa	Gymnolaemata	Cheilostomatida	Bitectiporidae	Schizomavella	Schizomavella (Schizomavella) mamillata	(Hincks, 1880)	Schizomavella (Schizomavella) mamillata (Hincks, 1880)
520	MIB	Ionian Sea	Santa Maria di Leuca	39.73114575	18.347193	Bryozoa	Gymnolaemata	Cheilostomatida	Bugulidae	Bugula	Bugula gautieri	Ryland, 1962	Bugula gautieri Ryland, 1962
521	MAB	Adriatic Sea	Monopoli	40.98221667	17.28620278	Bryozoa	Gymnolaemata	Cheilostomatida	Bugulidae	Bugula	Bugula	Oken, 1815	Bugula Oken, 1815
522	MAB	Adriatic Sea	San Foca	40.32417820	18.46629286	Bryozoa	Gymnolaemata	Cheilostomatida	Bugulidae	Bugulina	Bugulina spicata	(Hincks, 1886)	Bugulina spicata (Hincks, 1886)
523	MIB	Ionian Sea	Santa Maria di Leuca	39.73114575	18.347193	Bryozoa	Gymnolaemata	Cheilostomatida	Calloporidae	Callopora	Callopora dumerilii	(Audouin, 1826)	Callopora dumerilii (Audouin, 1826)
524	MIB	Adriatic Sea	Capitolo	40.94719344	17.449318	Bryozoa	Gymnolaemata	Cheilostomatida	Calloporidae	Copidozoum	Copidozoum planum	(Hincks, 1880)	Copidozoum planum (Hincks, 1880)
524	MAB	Adriatic Sea	Monopoli	40.98221667	17.28620278	Bryozoa	Gymnolaemata	Cheilostomatida	Calloporidae	Copidozoum	Copidozoum planum	(Hincks, 1880)	Copidozoum planum (Hincks, 1880)
525	MIB	Ionian Sea	Santa Maria di Leuca	39.73114575	18.347193	Bryozoa	Gymnolaemata	Cheilostomatida	Calloporidae	Corbulella	Corbulella maderensis	(Waters, 1898)	Corbulella maderensis (Waters, 1898)
526	MIB	Ionian Sea	Santa Maria di Leuca	39.73114575	18.347193	Bryozoa	Gymnolaemata	Cheilostomatida	Calloporidae	Crassimarginatella	Crassimarginatella crassimarginata	(Hincks, 1880)	Crassimarginatella crassimarginata (Hincks, 1880)
526	MIB	Adriatic Sea	Capitolo	40.94719344	17.449318	Bryozoa	Gymnolaemata	Cheilostomatida	Calloporidae	Crassimarginatella	Crassimarginatella crassimarginata	(Hincks, 1880)	Crassimarginatella crassimarginata (Hincks, 1880)
527	MIB	Adriatic Sea	Capitolo	40.94719344	17.449318	Bryozoa	Gymnolaemata	Cheilostomatida	Candidae	Caberea	Caberea boryi	(Audouin, 1826)	Caberea boryi (Audouin, 1826)
527	MIB	Adriatic Sea	Tremiti	42.13825300	15.522442	Bryozoa	Gymnolaemata	Cheilostomatida	Candidae	Caberea	Caberea boryi	(Audouin, 1826)	Caberea boryi (Audouin, 1826)
527	MAB	Adriatic Sea	Monopoli	40.98221667	17.28620278	Bryozoa	Gymnolaemata	Cheilostomatida	Candidae	Caberea	Caberea boryi	(Audouin, 1826)	Caberea boryi (Audouin, 1826)
527	MAB	Adriatic Sea	Tremiti	42.1382530	15.52244	Bryozoa	Gymnolaemata	Cheilostomatida	Candidae	Caberea	Caberea boryi	(Audouin, 1826)	Caberea boryi (Audouin, 1826)
527	MAB	Adriatic Sea	San Foca	40.32417820	18.46629286	Bryozoa	Gymnolaemata	Cheilostomatida	Candidae	Caberea	Caberea boryi	(Audouin, 1826)	Caberea boryi (Audouin, 1826)
528	MIB	Adriatic Sea	Capitolo	40.94719344	17.449318	Bryozoa	Gymnolaemata	Cheilostomatida	Candidae	Scrupocaberea	Scrupocaberea maderensis	(Busk, 1860)	Scrupocaberea maderensis (Busk, 1860)
528	MIB	Adriatic Sea	Tremiti	42.13825300	15.522442	Bryozoa	Gymnolaemata	Cheilostomatida	Candidae	Scrupocaberea	Scrupocaberea maderensis	(Busk, 1860)	Scrupocaberea maderensis (Busk, 1860)
528	MAB	Adriatic Sea	Monopoli	40.98221667	17.28620278	Bryozoa	Gymnolaemata	Cheilostomatida	Candidae	Scrupocaberea	Scrupocaberea maderensis	(Busk, 1860)	Scrupocaberea maderensis (Busk, 1860)
529	MAB	Adriatic Sea	Monopoli	40.98221667	17.28620278	Bryozoa	Gymnolaemata	Cheilostomatida	Candidae	Scrupocellaria	Scrupocellaria scrupea	Busk, 1851	Scrupocellaria scrupea Busk, 1851
529	MAB	Adriatic Sea	Capitolo	40.94719344	17.449318	Bryozoa	Gymnolaemata	Cheilostomatida	Candidae	Scrupocellaria	Scrupocellaria scrupea	Busk, 1851	Scrupocellaria scrupea Busk, 1851
529	MAB	Adriatic Sea	Tremiti	42.1382530	15.52244	Bryozoa	Gymnolaemata	Cheilostomatida	Candidae	Scrupocellaria	Scrupocellaria scrupea	Busk, 1851	Scrupocellaria scrupea Busk, 1851
529	MAB	Adriatic Sea	San Foca	40.32417820	18.46629286	Bryozoa	Gymnolaemata	Cheilostomatida	Candidae	Scrupocellaria	Scrupocellaria scrupea	Busk, 1851	Scrupocellaria scrupea Busk, 1851
530	MAB	Ionian Sea	Santa Maria di Leuca	39.73114575	18.347193	Bryozoa	Gymnolaemata	Cheilostomatida	Candidae	Scrupocellaria	Scrupocellaria	van Beneden, 1845	Scrupocellaria van Beneden, 1845
531	MIB	Adriatic Sea	Otranto	40.1288590	18.520781	Bryozoa	Gymnolaemata	Cheilostomatida	Cellariidae	Cellaria	Cellaria fistulosa	(Linnaeus, 1758)	Cellaria fistulosa (Linnaeus, 1758)
531	MIB	Ionian Sea	Santa Maria di Leuca	39.73114575	18.347193	Bryozoa	Gymnolaemata	Cheilostomatida	Cellariidae	Cellaria	Cellaria fistulosa	(Linnaeus, 1758)	Cellaria fistulosa (Linnaeus, 1758)
531	MIB	Adriatic Sea	Capitolo	40.94719344	17.449318	Bryozoa	Gymnolaemata	Cheilostomatida	Cellariidae	Cellaria	Cellaria fistulosa	(Linnaeus, 1758)	Cellaria fistulosa (Linnaeus, 1758)
531	MIB	Adriatic Sea	Tremiti	42.13825300	15.522442	Bryozoa	Gymnolaemata	Cheilostomatida	Cellariidae	Cellaria	Cellaria fistulosa	(Linnaeus, 1758)	Cellaria fistulosa (Linnaeus, 1758)
531	MAB	Adriatic Sea	Tremiti	42.1382530	15.52244	Bryozoa	Gymnolaemata	Cheilostomatida	Cellariidae	Cellaria	Cellaria fistulosa	(Linnaeus, 1758)	Cellaria fistulosa (Linnaeus, 1758)
532	MIB	Adriatic Sea	Otranto	40.1288590	18.520781	Bryozoa	Gymnolaemata	Cheilostomatida	Cellariidae	Cellaria	Cellaria salicornioides	Lamouroux, 1816	Cellaria salicornioides Lamouroux, 1816
533	MIB	Adriatic Sea	Monopoli	40.98221667	17.28620278	Bryozoa	Gymnolaemata	Cheilostomatida	Celleporidae	Cellepora	Cellepora pumicosa	(Pallas, 1766)	Cellepora pumicosa (Pallas, 1766)
534	MIB	Adriatic Sea	San Foca	40.3241782	18.4662928	Bryozoa	Gymnolaemata	Cheilostomatida	Celleporidae	Cellepora	Cellepora	Linnaeus, 1767	Cellepora Linnaeus, 1767
535	MAB	Adriatic Sea	Capitolo	40.94719344	17.449318	Bryozoa	Gymnolaemata	Cheilostomatida	Celleporidae	Celleporina	Celleporina caliciformis	(Lamouroux, 1816)	Celleporina caliciformis (Lamouroux, 1816)
535	MAB	Adriatic Sea	San Foca	40.32417820	18.46629286	Bryozoa	Gymnolaemata	Cheilostomatida	Celleporidae	Celleporina	Celleporina caliciformis	(Lamouroux, 1816)	Celleporina caliciformis (Lamouroux, 1816)
536	MIB	Adriatic Sea	Monopoli	40.98221667	17.28620278	Bryozoa	Gymnolaemata	Cheilostomatida	Celleporidae	Celleporina	Celleporina caminata	(Waters, 1879)	Celleporina caminata (Waters, 1879)
536	MAB	Adriatic Sea	San Foca	40.32417820	18.46629286	Bryozoa	Gymnolaemata	Cheilostomatida	Celleporidae	Celleporina	Celleporina caminata	(Waters, 1879)	Celleporina caminata (Waters, 1879)
537	MIB	Adriatic Sea	Otranto	40.1288590	18.520781	Bryozoa	Gymnolaemata	Cheilostomatida	Celleporidae	Celleporina	Celleporina lucida	(Hincks, 1880)	Celleporina lucida (Hincks, 1880)
538	MAB	Adriatic Sea	Monopoli	40.98221667	17.28620278	Bryozoa	Gymnolaemata	Cheilostomatida	Celleporidae	Celleporina	Celleporina	Gray, 1848	Celleporina Gray, 1848
538	MAB	Adriatic Sea	Capitolo	40.94719344	17.449318	Bryozoa	Gymnolaemata	Cheilostomatida	Celleporidae	Celleporina	Celleporina	Gray, 1848	Celleporina Gray, 1848
538	MAB	Adriatic Sea	San Foca	40.32417820	18.46629286	Bryozoa	Gymnolaemata	Cheilostomatida	Celleporidae	Celleporina	Celleporina	Gray, 1848	Celleporina Gray, 1848
539	MIB	Adriatic Sea	Otranto	40.1288590	18.520781	Bryozoa	Gymnolaemata	Cheilostomatida	Celleporidae	Turbicellepora	Turbicellepora	Ryland, 1963	Turbicellepora Ryland, 1963
539	MIB	Ionian Sea	Santa Maria di Leuca	39.73114575	18.347193	Bryozoa	Gymnolaemata	Cheilostomatida	Celleporidae	Turbicellepora	Turbicellepora	Ryland, 1963	Turbicellepora Ryland, 1963
539	MIB	Adriatic Sea	Monopoli	40.98221667	17.28620278	Bryozoa	Gymnolaemata	Cheilostomatida	Celleporidae	Turbicellepora	Turbicellepora	Ryland, 1963	Turbicellepora Ryland, 1963
539	MAB	Adriatic Sea	Monopoli	40.98221667	17.28620278	Bryozoa	Gymnolaemata	Cheilostomatida	Celleporidae	Turbicellepora	Turbicellepora	Ryland, 1963	Turbicellepora Ryland, 1963
539	MAB	Adriatic Sea	Tremiti	42.1382530	15.52244	Bryozoa	Gymnolaemata	Cheilostomatida	Celleporidae	Turbicellepora	Turbicellepora	Ryland, 1963	Turbicellepora Ryland, 1963
540	MIB	Adriatic Sea	Otranto	40.1288590	18.520781	Bryozoa	Gymnolaemata	Cheilostomatida	Cheiloporinidae	Hagiosynodos	Hagiosynodos latus	(Busk, 1856)	Hagiosynodos latus (Busk, 1856)
541	MIB	Adriatic Sea	Monopoli	40.98221667	17.28620278	Bryozoa	Gymnolaemata	Cheilostomatida	Chorizoporidae	Chorizopora	Chorizopora brongniartii	(Audouin, 1826)	Chorizopora brongniartii (Audouin, 1826)
542	MIB	Adriatic Sea	Capitolo	40.94719344	17.449318	Bryozoa	Gymnolaemata	Cheilostomatida	Cribrilinidae	Cribrilaria	Cribrilaria radiata	(Moll, 1803)	Cribrilaria radiata (Moll, 1803)
542	MAB	Adriatic Sea	Monopoli	40.98221667	17.28620278	Bryozoa	Gymnolaemata	Cheilostomatida	Cribrilinidae	Cribrilaria	Cribrilaria radiata	(Moll, 1803)	Cribrilaria radiata (Moll, 1803)
542	MAB	Adriatic Sea	Tremiti	42.1382530	15.52244	Bryozoa	Gymnolaemata	Cheilostomatida	Cribrilinidae	Cribrilaria	Cribrilaria radiata	(Moll, 1803)	Cribrilaria radiata (Moll, 1803)
543	MIB	Ionian Sea	Santa Maria di Leuca	39.73114575	18.347193	Bryozoa	Gymnolaemata	Cheilostomatida	Cribrilinidae	Cribrilaria	Cribrilaria setiformis	Harmelin & Aristegui, 1988	Cribrilaria setiformis Harmelin & Aristegui, 1988
544	MIB	Ionian Sea	Santa Maria di Leuca	39.73114575	18.347193	Bryozoa	Gymnolaemata	Cheilostomatida	Cribrilinidae	Figularia	Figularia figularis	(Johnston, 1847)	Figularia figularis (Johnston, 1847)
545	MIB	Ionian Sea	Santa Maria di Leuca	39.73114575	18.347193	Bryozoa	Gymnolaemata	Cheilostomatida	Cribrilinidae	Glabrilaria	Glabrilaria pedunculata	(Gautier, 1956)	Glabrilaria pedunculata (Gautier, 1956)
546	MIB	Adriatic Sea	Otranto	40.1288590	18.520781	Bryozoa	Gymnolaemata	Cheilostomatida	Cribrilinidae	Puellina	Cribrilaria radiata	(Moll, 1803)	Cribrilaria radiata (Moll, 1803)
546	MIB	Ionian Sea	Santa Maria di Leuca	39.73114575	18.347193	Bryozoa	Gymnolaemata	Cheilostomatida	Cribrilinidae	Puellina	Cribrilaria radiata	(Moll, 1803)	Cribrilaria radiata (Moll, 1803)
546	MIB	Adriatic Sea	Monopoli	40.98221667	17.28620278	Bryozoa	Gymnolaemata	Cheilostomatida	Cribrilinidae	Puellina	Cribrilaria radiata	(Moll, 1803)	Cribrilaria radiata (Moll, 1803)
547	MAB	Adriatic Sea	Monopoli	40.98221667	17.28620278	Bryozoa	Gymnolaemata	Cheilostomatida	Cribrilinidae	Puellina	Puellina	Jullien, 1886	Puellina Jullien, 1886
548	MIB	Ionian Sea	Santa Maria di Leuca	39.73114575	18.347193	Bryozoa	Gymnolaemata	Cheilostomatida	Escharellidae	Escharella	Escharella rylandi	Geraci, 1974	Escharella rylandi Geraci, 1974
549	MIB	Adriatic Sea	Monopoli	40.98221667	17.28620278	Bryozoa	Gymnolaemata	Cheilostomatida	Escharellidae	Escharella	Escharella variolosa	(Johnston, 1838)	Escharella variolosa (Johnston, 1838)
550	MIB	Adriatic Sea	Otranto	40.1288590	18.520781	Bryozoa	Gymnolaemata	Cheilostomatida	Escharinidae	Escharina	Escharina vulgaris	(Moll, 1803)	Escharina vulgaris (Moll, 1803)
550	MIB	Ionian Sea	Santa Maria di Leuca	39.73114575	18.347193	Bryozoa	Gymnolaemata	Cheilostomatida	Escharinidae	Escharina	Escharina vulgaris	(Moll, 1803)	Escharina vulgaris (Moll, 1803)
550	MIB	Adriatic Sea	Tremiti	42.13825300	15.522442	Bryozoa	Gymnolaemata	Cheilostomatida	Escharinidae	Escharina	Escharina vulgaris	(Moll, 1803)	Escharina vulgaris (Moll, 1803)
551	MAB	Adriatic Sea	Capitolo	40.94719344	17.449318	Bryozoa	Gymnolaemata	Cheilostomatida	Escharinidae	Escharina	Escharina	Milne Edwards, 1836	Escharina Milne Edwards, 1836
552	MIB	Adriatic Sea	Capitolo	40.94719344	17.449318	Bryozoa	Gymnolaemata	Cheilostomatida	Escharinidae	Therenia	Therenia porosa	(Smitt, 1873)	Therenia porosa (Smitt, 1873)
553	MIB	Adriatic Sea	Monopoli	40.98221667	17.28620278	Bryozoa	Gymnolaemata	Cheilostomatida	Flustridae	Chartella	Chartella papyrea	(Pallas, 1766)	Chartella papyrea (Pallas, 1766)
553	MIB	Adriatic Sea	Tremiti	42.13825300	15.522442	Bryozoa	Gymnolaemata	Cheilostomatida	Flustridae	Chartella	Chartella papyrea	(Pallas, 1766)	Chartella papyrea (Pallas, 1766)
554	MIB	Adriatic Sea	Tremiti	42.13825300	15.522442	Bryozoa	Gymnolaemata	Cheilostomatida	Flustridae	Chartella	Chartella tenella	(Hincks, 1887)	Chartella tenella (Hincks, 1887)
555	MIB	Ionian Sea	Santa Maria di Leuca	39.73114575	18.347193	Bryozoa	Gymnolaemata	Cheilostomatida	Flustridae	Gregarinidra	Gregarinidra gregaria	(Heller, 1867)	Gregarinidra gregaria (Heller, 1867)
555	MIB	Adriatic Sea	Capitolo	40.94719344	17.449318	Bryozoa	Gymnolaemata	Cheilostomatida	Flustridae	Gregarinidra	Gregarinidra gregaria	(Heller, 1867)	Gregarinidra gregaria (Heller, 1867)
556	MIB	Adriatic Sea	Monopoli	40.98221667	17.28620278	Bryozoa	Gymnolaemata	Cheilostomatida	Hippaliosinidae	Hippaliosina	Hippaliosina depressa	(Busk, 1854)	Hippaliosina depressa (Busk, 1854)
556	MAB	Adriatic Sea	Otranto	40.12885900	18.520781	Bryozoa	Gymnolaemata	Cheilostomatida	Hippaliosinidae	Hippaliosina	Hippaliosina depressa	(Busk, 1854)	Hippaliosina depressa (Busk, 1854)
556	MAB	Ionian Sea	Santa Maria di Leuca	39.73114575	18.347193	Bryozoa	Gymnolaemata	Cheilostomatida	Hippaliosinidae	Hippaliosina	Hippaliosina depressa	(Busk, 1854)	Hippaliosina depressa (Busk, 1854)
556	MAB	Adriatic Sea	Monopoli	40.98221667	17.28620278	Bryozoa	Gymnolaemata	Cheilostomatida	Hippaliosinidae	Hippaliosina	Hippaliosina depressa	(Busk, 1854)	Hippaliosina depressa (Busk, 1854)
556	MAB	Adriatic Sea	Capitolo	40.94719344	17.449318	Bryozoa	Gymnolaemata	Cheilostomatida	Hippaliosinidae	Hippaliosina	Hippaliosina depressa	(Busk, 1854)	Hippaliosina depressa (Busk, 1854)
556	MAB	Adriatic Sea	San Foca	40.32417820	18.46629286	Bryozoa	Gymnolaemata	Cheilostomatida	Hippaliosinidae	Hippaliosina	Hippaliosina depressa	(Busk, 1854)	Hippaliosina depressa (Busk, 1854)
557	MIB	Adriatic Sea	Monopoli	40.98221667	17.28620278	Bryozoa	Gymnolaemata	Cheilostomatida	Lacernidae	Arthropoma	Arthropoma cecilii	(Audouin, 1826)	Arthropoma cecilii (Audouin, 1826)
558	MIB	Adriatic Sea	Capitolo	40.94719344	17.449318	Bryozoa	Gymnolaemata	Cheilostomatida	Lanceoporidae	Stephanotheca	Stephanotheca arrogata	(Waters, 1879)	Stephanotheca arrogata (Waters, 1879)
559	MIB	Ionian Sea	Santa Maria di Leuca	39.73114575	18.347193	Bryozoa	Gymnolaemata	Cheilostomatida	Lanceoporidae	Stephanotheca	Stephanotheca monoecensis	(Calvet, 1927)	Stephanotheca monoecensis (Calvet, 1927)
560	MIB	Adriatic Sea	Otranto	40.1288590	18.520781	Bryozoa	Gymnolaemata	Cheilostomatida	Lanceoporidae	Stephanotheca	Stephanotheca watersi	Reverter-Gil, Souto & Fern ndez-Pulpeiro, 2012	Stephanotheca watersi Reverter-Gil, Souto & Fern ndez-Pulpeiro, 2012
560	MIB	Ionian Sea	Santa Maria di Leuca	39.73114575	18.347193	Bryozoa	Gymnolaemata	Cheilostomatida	Lanceoporidae	Stephanotheca	Stephanotheca watersi	Reverter-Gil, Souto & Fern ndez-Pulpeiro, 2012	Stephanotheca watersi Reverter-Gil, Souto & Fern ndez-Pulpeiro, 2012
561	MAB	Adriatic Sea	Otranto	40.12885900	18.520781	Bryozoa	Gymnolaemata	Cheilostomatida	Margarettidae	Margaretta	Margaretta cereoides	(Ellis & Solander, 1786)	Margaretta cereoides (Ellis & Solander, 1786)
562	MIB	Adriatic Sea	Otranto	40.1288590	18.520781	Bryozoa	Gymnolaemata	Cheilostomatida	Microporellidae	Microporella	Microporella appendiculata	(Heller, 1867)	Microporella appendiculata (Heller, 1867)
562	MIB	Adriatic Sea	Capitolo	40.94719344	17.449318	Bryozoa	Gymnolaemata	Cheilostomatida	Microporellidae	Microporella	Microporella appendiculata	(Heller, 1867)	Microporella appendiculata (Heller, 1867)
563	MIB	Adriatic Sea	Monopoli	40.98221667	17.28620278	Bryozoa	Gymnolaemata	Cheilostomatida	Microporellidae	Microporella	Microporella ciliata	(Pallas, 1766)	Microporella ciliata (Pallas, 1766)
564	MIB	Adriatic Sea	Monopoli	40.98221667	17.28620278	Bryozoa	Gymnolaemata	Cheilostomatida	Microporidae	Calpensia	Calpensia nobilis	(Esper, 1796)	Calpensia nobilis (Esper, 1796)
564	MAB	Ionian Sea	Santa Maria di Leuca	39.73114575	18.347193	Bryozoa	Gymnolaemata	Cheilostomatida	Microporidae	Calpensia	Calpensia nobilis	(Esper, 1796)	Calpensia nobilis (Esper, 1796)
565	MIB	Adriatic Sea	Monopoli	40.98221667	17.28620278	Bryozoa	Gymnolaemata	Cheilostomatida	Microporidae	Mollia	Mollia patellaria	(Moll, 1803)	Mollia patellaria (Moll, 1803)
565	MAB	Adriatic Sea	Capitolo	40.94719344	17.449318	Bryozoa	Gymnolaemata	Cheilostomatida	Microporidae	Mollia	Mollia patellaria	(Moll, 1803)	Mollia patellaria (Moll, 1803)
566	MIB	Adriatic Sea	Otranto	40.1288590	18.520781	Bryozoa	Gymnolaemata	Cheilostomatida	Myriaporidae	Myriapora	Myriapora truncata	(Pallas, 1766)	Myriapora truncata (Pallas, 1766)
566	MIB	Ionian Sea	Santa Maria di Leuca	39.73114575	18.347193	Bryozoa	Gymnolaemata	Cheilostomatida	Myriaporidae	Myriapora	Myriapora truncata	(Pallas, 1766)	Myriapora truncata (Pallas, 1766)
566	MIB	Adriatic Sea	Monopoli	40.98221667	17.28620278	Bryozoa	Gymnolaemata	Cheilostomatida	Myriaporidae	Myriapora	Myriapora truncata	(Pallas, 1766)	Myriapora truncata (Pallas, 1766)
566	MIB	Adriatic Sea	Tremiti	42.13825300	15.522442	Bryozoa	Gymnolaemata	Cheilostomatida	Myriaporidae	Myriapora	Myriapora truncata	(Pallas, 1766)	Myriapora truncata (Pallas, 1766)
566	MAB	Adriatic Sea	Otranto	40.12885900	18.520781	Bryozoa	Gymnolaemata	Cheilostomatida	Myriaporidae	Myriapora	Myriapora truncata	(Pallas, 1766)	Myriapora truncata (Pallas, 1766)
566	MAB	Ionian Sea	Santa Maria di Leuca	39.73114575	18.347193	Bryozoa	Gymnolaemata	Cheilostomatida	Myriaporidae	Myriapora	Myriapora truncata	(Pallas, 1766)	Myriapora truncata (Pallas, 1766)
566	MAB	Adriatic Sea	Monopoli	40.98221667	17.28620278	Bryozoa	Gymnolaemata	Cheilostomatida	Myriaporidae	Myriapora	Myriapora truncata	(Pallas, 1766)	Myriapora truncata (Pallas, 1766)
566	MAB	Adriatic Sea	Capitolo	40.94719344	17.449318	Bryozoa	Gymnolaemata	Cheilostomatida	Myriaporidae	Myriapora	Myriapora truncata	(Pallas, 1766)	Myriapora truncata (Pallas, 1766)
566	MAB	Adriatic Sea	Tremiti	42.1382530	15.52244	Bryozoa	Gymnolaemata	Cheilostomatida	Myriaporidae	Myriapora	Myriapora truncata	(Pallas, 1766)	Myriapora truncata (Pallas, 1766)
566	MAB	Adriatic Sea	San Foca	40.32417820	18.46629286	Bryozoa	Gymnolaemata	Cheilostomatida	Myriaporidae	Myriapora	Myriapora truncata	(Pallas, 1766)	Myriapora truncata (Pallas, 1766)
567	MAB	Adriatic Sea	Monopoli	40.98221667	17.28620278	Bryozoa	Gymnolaemata	Cheilostomatida	Phidoloporidae	Reteporella	Reteporella couchii	(Hincks, 1878)	Reteporella couchii (Hincks, 1878)
568	MIB	Adriatic Sea	Otranto	40.1288590	18.520781	Bryozoa	Gymnolaemata	Cheilostomatida	Phidoloporidae	Reteporella	Reteporella	Busk, 1884	Reteporella Busk, 1884
568	MIB	Ionian Sea	Santa Maria di Leuca	39.73114575	18.347193	Bryozoa	Gymnolaemata	Cheilostomatida	Phidoloporidae	Reteporella	Reteporella	Busk, 1884	Reteporella Busk, 1884
568	MIB	Adriatic Sea	Monopoli	40.98221667	17.28620278	Bryozoa	Gymnolaemata	Cheilostomatida	Phidoloporidae	Reteporella	Reteporella	Busk, 1884	Reteporella Busk, 1884
568	MIB	Adriatic Sea	Capitolo	40.94719344	17.449318	Bryozoa	Gymnolaemata	Cheilostomatida	Phidoloporidae	Reteporella	Reteporella	Busk, 1884	Reteporella Busk, 1884
568	MIB	Adriatic Sea	San Foca	40.3241782	18.4662928	Bryozoa	Gymnolaemata	Cheilostomatida	Phidoloporidae	Reteporella	Reteporella	Busk, 1884	Reteporella Busk, 1884
568	MAB	Adriatic Sea	Otranto	40.12885900	18.520781	Bryozoa	Gymnolaemata	Cheilostomatida	Phidoloporidae	Reteporella	Reteporella	Busk, 1884	Reteporella Busk, 1884
568	MAB	Ionian Sea	Santa Maria di Leuca	39.73114575	18.347193	Bryozoa	Gymnolaemata	Cheilostomatida	Phidoloporidae	Reteporella	Reteporella	Busk, 1884	Reteporella Busk, 1884
568	MAB	Adriatic Sea	Monopoli	40.98221667	17.28620278	Bryozoa	Gymnolaemata	Cheilostomatida	Phidoloporidae	Reteporella	Reteporella	Busk, 1884	Reteporella Busk, 1884
568	MAB	Adriatic Sea	San Foca	40.32417820	18.46629286	Bryozoa	Gymnolaemata	Cheilostomatida	Phidoloporidae	Reteporella	Reteporella	Busk, 1884	Reteporella Busk, 1884
569	MIB	Adriatic Sea	Otranto	40.1288590	18.520781	Bryozoa	Gymnolaemata	Cheilostomatida	Phidoloporidae	Rhynchozoon	Rhynchozoon pseudodigitatum	Zabala & Maluquer, 1988	Rhynchozoon pseudodigitatum Zabala & Maluquer, 1988
569	MIB	Ionian Sea	Santa Maria di Leuca	39.73114575	18.347193	Bryozoa	Gymnolaemata	Cheilostomatida	Phidoloporidae	Rhynchozoon	Rhynchozoon pseudodigitatum	Zabala & Maluquer, 1988	Rhynchozoon pseudodigitatum Zabala & Maluquer, 1988
570	MIB	Adriatic Sea	Monopoli	40.98221667	17.28620278	Bryozoa	Gymnolaemata	Cheilostomatida	Phidoloporidae	Rhynchozoon	Rhynchozoon	Hincks, 1895	Rhynchozoon Hincks, 1895
570	MIB	Adriatic Sea	Tremiti	42.13825300	15.522442	Bryozoa	Gymnolaemata	Cheilostomatida	Phidoloporidae	Rhynchozoon	Rhynchozoon	Hincks, 1895	Rhynchozoon Hincks, 1895
570	MAB	Ionian Sea	Santa Maria di Leuca	39.73114575	18.347193	Bryozoa	Gymnolaemata	Cheilostomatida	Phidoloporidae	Rhynchozoon	Rhynchozoon	Hincks, 1895	Rhynchozoon Hincks, 1895
570	MAB	Adriatic Sea	Tremiti	42.1382530	15.52244	Bryozoa	Gymnolaemata	Cheilostomatida	Phidoloporidae	Rhynchozoon	Rhynchozoon	Hincks, 1895	Rhynchozoon Hincks, 1895
570	MAB	Adriatic Sea	San Foca	40.32417820	18.46629286	Bryozoa	Gymnolaemata	Cheilostomatida	Phidoloporidae	Rhynchozoon	Rhynchozoon	Hincks, 1895	Rhynchozoon Hincks, 1895
571	MIB	Ionian Sea	Santa Maria di Leuca	39.73114575	18.347193	Bryozoa	Gymnolaemata	Cheilostomatida	Phidoloporidae	Schizoretepora	Schizoretepora serratimargo	(Hincks, 1886)	Schizoretepora serratimargo (Hincks, 1886)
571	MIB	Adriatic Sea	Tremiti	42.13825300	15.522442	Bryozoa	Gymnolaemata	Cheilostomatida	Phidoloporidae	Schizoretepora	Schizoretepora serratimargo	(Hincks, 1886)	Schizoretepora serratimargo (Hincks, 1886)
571	MAB	Adriatic Sea	Otranto	40.12885900	18.520781	Bryozoa	Gymnolaemata	Cheilostomatida	Phidoloporidae	Schizoretepora	Schizoretepora serratimargo	(Hincks, 1886)	Schizoretepora serratimargo (Hincks, 1886)
571	MAB	Adriatic Sea	Monopoli	40.98221667	17.28620278	Bryozoa	Gymnolaemata	Cheilostomatida	Phidoloporidae	Schizoretepora	Schizoretepora serratimargo	(Hincks, 1886)	Schizoretepora serratimargo (Hincks, 1886)
571	MAB	Adriatic Sea	Capitolo	40.94719344	17.449318	Bryozoa	Gymnolaemata	Cheilostomatida	Phidoloporidae	Schizoretepora	Schizoretepora serratimargo	(Hincks, 1886)	Schizoretepora serratimargo (Hincks, 1886)
571	MAB	Adriatic Sea	Tremiti	42.1382530	15.52244	Bryozoa	Gymnolaemata	Cheilostomatida	Phidoloporidae	Schizoretepora	Schizoretepora serratimargo	(Hincks, 1886)	Schizoretepora serratimargo (Hincks, 1886)
571	MAB	Adriatic Sea	San Foca	40.32417820	18.46629286	Bryozoa	Gymnolaemata	Cheilostomatida	Phidoloporidae	Schizoretepora	Schizoretepora serratimargo	(Hincks, 1886)	Schizoretepora serratimargo (Hincks, 1886)
572	MAB	Adriatic Sea	Monopoli	40.98221667	17.28620278	Bryozoa	Gymnolaemata	Cheilostomatida	Savignyellidae	Savignyella	Savignyella lafontii	(Audouin, 1826)	Savignyella lafontii (Audouin, 1826)
573	MIB	Adriatic Sea	Otranto	40.1288590	18.520781	Bryozoa	Gymnolaemata	Cheilostomatida	Schizoporellidae	Schizoporella	Schizoporella dunkeri	(Reuss, 1848)	Schizoporella dunkeri (Reuss, 1848)
573	MIB	Adriatic Sea	Tremiti	42.13825300	15.522442	Bryozoa	Gymnolaemata	Cheilostomatida	Schizoporellidae	Schizoporella	Schizoporella dunkeri	(Reuss, 1848)	Schizoporella dunkeri (Reuss, 1848)
573	MIB	Adriatic Sea	San Foca	40.3241782	18.4662928	Bryozoa	Gymnolaemata	Cheilostomatida	Schizoporellidae	Schizoporella	Schizoporella dunkeri	(Reuss, 1848)	Schizoporella dunkeri (Reuss, 1848)
573	MAB	Adriatic Sea	San Foca	40.32417820	18.46629286	Bryozoa	Gymnolaemata	Cheilostomatida	Schizoporellidae	Schizoporella	Schizoporella dunkeri	(Reuss, 1848)	Schizoporella dunkeri (Reuss, 1848)
574	MIB	Adriatic Sea	Otranto	40.1288590	18.520781	Bryozoa	Gymnolaemata	Cheilostomatida	Schizoporellidae	Schizoporella	Schizoporella magnifica	Hincks, 1886	Schizoporella magnifica Hincks, 1886
574	MIB	Ionian Sea	Santa Maria di Leuca	39.73114575	18.347193	Bryozoa	Gymnolaemata	Cheilostomatida	Schizoporellidae	Schizoporella	Schizoporella magnifica	Hincks, 1886	Schizoporella magnifica Hincks, 1886
575	MIB	Ionian Sea	Santa Maria di Leuca	39.73114575	18.347193	Bryozoa	Gymnolaemata	Cheilostomatida	Schizoporellidae	Schizoporella	Schizoporella mutabilis	Calvet, 1927	Schizoporella mutabilis Calvet, 1927
575	MIB	Adriatic Sea	San Foca	40.3241782	18.4662928	Bryozoa	Gymnolaemata	Cheilostomatida	Schizoporellidae	Schizoporella	Schizoporella mutabilis	Calvet, 1927	Schizoporella mutabilis Calvet, 1927
576	MIB	Adriatic Sea	Tremiti	42.13825300	15.522442	Bryozoa	Gymnolaemata	Cheilostomatida	Schizoporellidae	Schizoporella	Schizoporella unicornis	(Johnston in Wood, 1844)	Schizoporella unicornis (Johnston in Wood, 1844)
577	MAB	Adriatic Sea	Capitolo	40.94719344	17.449318	Bryozoa	Gymnolaemata	Cheilostomatida	Smittinidae	Parasmittina	Parasmittina rouvillei	(Calvet, 1902)	Parasmittina rouvillei (Calvet, 1902)
578	MIB	Adriatic Sea	Otranto	40.1288590	18.520781	Bryozoa	Gymnolaemata	Cheilostomatida	Smittinidae	Smittina	Smittina cervicornis	(Pallas, 1766)	Smittina cervicornis (Pallas, 1766)
578	MIB	Ionian Sea	Santa Maria di Leuca	39.73114575	18.347193	Bryozoa	Gymnolaemata	Cheilostomatida	Smittinidae	Smittina	Smittina cervicornis	(Pallas, 1766)	Smittina cervicornis (Pallas, 1766)
578	MIB	Adriatic Sea	Tremiti	42.13825300	15.522442	Bryozoa	Gymnolaemata	Cheilostomatida	Smittinidae	Smittina	Smittina cervicornis	(Pallas, 1766)	Smittina cervicornis (Pallas, 1766)
578	MIB	Adriatic Sea	San Foca	40.3241782	18.4662928	Bryozoa	Gymnolaemata	Cheilostomatida	Smittinidae	Smittina	Smittina cervicornis	(Pallas, 1766)	Smittina cervicornis (Pallas, 1766)
578	MAB	Adriatic Sea	Otranto	40.12885900	18.520781	Bryozoa	Gymnolaemata	Cheilostomatida	Smittinidae	Smittina	Smittina cervicornis	(Pallas, 1766)	Smittina cervicornis (Pallas, 1766)
578	MAB	Ionian Sea	Santa Maria di Leuca	39.73114575	18.347193	Bryozoa	Gymnolaemata	Cheilostomatida	Smittinidae	Smittina	Smittina cervicornis	(Pallas, 1766)	Smittina cervicornis (Pallas, 1766)
578	MAB	Adriatic Sea	Monopoli	40.98221667	17.28620278	Bryozoa	Gymnolaemata	Cheilostomatida	Smittinidae	Smittina	Smittina cervicornis	(Pallas, 1766)	Smittina cervicornis (Pallas, 1766)
578	MAB	Adriatic Sea	Capitolo	40.94719344	17.449318	Bryozoa	Gymnolaemata	Cheilostomatida	Smittinidae	Smittina	Smittina cervicornis	(Pallas, 1766)	Smittina cervicornis (Pallas, 1766)
579	MIB	Adriatic Sea	Monopoli	40.98221667	17.28620278	Bryozoa	Gymnolaemata	Cheilostomatida	Smittinidae	Smittoidea	Smittoidea reticulata	(MacGillivray, 1842)	Smittoidea reticulata (MacGillivray, 1842)
580	MIB	Adriatic Sea	Otranto	40.1288590	18.520781	Bryozoa	Stenolaemata	Cyclostomatida	Crisiidae	Crisia	Crisia	Lamouroux, 1812	Crisia Lamouroux, 1812
580	MIB	Ionian Sea	Santa Maria di Leuca	39.73114575	18.347193	Bryozoa	Stenolaemata	Cyclostomatida	Crisiidae	Crisia	Crisia	Lamouroux, 1812	Crisia Lamouroux, 1812
580	MIB	Adriatic Sea	Capitolo	40.94719344	17.449318	Bryozoa	Stenolaemata	Cyclostomatida	Crisiidae	Crisia	Crisia	Lamouroux, 1812	Crisia Lamouroux, 1812
580	MIB	Adriatic Sea	Tremiti	42.13825300	15.522442	Bryozoa	Stenolaemata	Cyclostomatida	Crisiidae	Crisia	Crisia	Lamouroux, 1812	Crisia Lamouroux, 1812
580	MIB	Adriatic Sea	San Foca	40.3241782	18.4662928	Bryozoa	Stenolaemata	Cyclostomatida	Crisiidae	Crisia	Crisia	Lamouroux, 1812	Crisia Lamouroux, 1812
580	MAB	Adriatic Sea	Tremiti	42.1382530	15.52244	Bryozoa	Stenolaemata	Cyclostomatida	Crisiidae	Crisia	Crisia	Lamouroux, 1812	Crisia Lamouroux, 1812
580	MAB	Adriatic Sea	San Foca	40.32417820	18.46629286	Bryozoa	Stenolaemata	Cyclostomatida	Crisiidae	Crisia	Crisia	Lamouroux, 1812	Crisia Lamouroux, 1812
581	MIB	Adriatic Sea	Capitolo	40.94719344	17.449318	Bryozoa	Stenolaemata	Cyclostomatida			Cyclostomatida		Cyclostomatida
581	MIB	Adriatic Sea	Tremiti	42.13825300	15.522442	Bryozoa	Stenolaemata	Cyclostomatida			Cyclostomatida		Cyclostomatida
581	MIB	Adriatic Sea	San Foca	40.3241782	18.4662928	Bryozoa	Stenolaemata	Cyclostomatida			Cyclostomatida		Cyclostomatida
581	MAB	Adriatic Sea	Otranto	40.12885900	18.520781	Bryozoa	Stenolaemata	Cyclostomatida			Cyclostomatida		Cyclostomatida
581	MAB	Ionian Sea	Santa Maria di Leuca	39.73114575	18.347193	Bryozoa	Stenolaemata	Cyclostomatida			Cyclostomatida		Cyclostomatida
581	MAB	Adriatic Sea	Capitolo	40.94719344	17.449318	Bryozoa	Stenolaemata	Cyclostomatida			Cyclostomatida		Cyclostomatida
581	MAB	Adriatic Sea	Tremiti	42.1382530	15.52244	Bryozoa	Stenolaemata	Cyclostomatida			Cyclostomatida		Cyclostomatida
581	MAB	Adriatic Sea	San Foca	40.32417820	18.46629286	Bryozoa	Stenolaemata	Cyclostomatida			Cyclostomatida		Cyclostomatida
582	MIB	Adriatic Sea	Capitolo	40.94719344	17.449318	Echinodermata	Asteroidea	Forcipulatida	Asteriidae	Marthasterias	Marthasterias glacialis	(Linnaeus, 1758)	Marthasterias glacialis (Linnaeus, 1758)
583	MIB	Adriatic Sea	Capitolo	40.94719344	17.449318	Echinodermata	Asteroidea	Spinulosida	Echinasteridae	Echinaster	Echinaster (Echinaster) sepositus	(Retzius, 1783)	Echinaster (Echinaster) sepositus (Retzius, 1783)
583	MIB	Adriatic Sea	Otranto	40.1288590	18.520781	Echinodermata	Asteroidea	Spinulosida	Echinasteridae	Echinaster	Echinaster (Echinaster) sepositus	(Retzius, 1783)	Echinaster (Echinaster) sepositus (Retzius, 1783)
583	MIB	Ionian Sea	Santa Maria di Leuca	39.73114575	18.347193	Echinodermata	Asteroidea	Spinulosida	Echinasteridae	Echinaster	Echinaster (Echinaster) sepositus	(Retzius, 1783)	Echinaster (Echinaster) sepositus (Retzius, 1783)
583	MAB	Adriatic Sea	Otranto	40.12885900	18.520781	Echinodermata	Asteroidea	Spinulosida	Echinasteridae	Echinaster	Echinaster (Echinaster) sepositus	(Retzius, 1783)	Echinaster (Echinaster) sepositus (Retzius, 1783)
584	MIB	Ionian Sea	Santa Maria di Leuca	39.73114575	18.347193	Echinodermata	Asteroidea	Valvatida	Anseropodidae	Anseropoda	Anseropoda placenta	(Pennant, 1777)	Anseropoda placenta (Pennant, 1777)
585	MIB	Adriatic Sea	Otranto	40.1288590	18.520781	Echinodermata	Asteroidea	Valvatida	Ophidiasteridae	Hacelia	Hacelia attenuata	Gray, 1840	Hacelia attenuata Gray, 1840
585	MAB	Adriatic Sea	Otranto	40.12885900	18.520781	Echinodermata	Asteroidea	Valvatida	Ophidiasteridae	Hacelia	Hacelia attenuata	Gray, 1840	Hacelia attenuata Gray, 1840
585	MAB	Ionian Sea	Santa Maria di Leuca	39.73114575	18.347193	Echinodermata	Asteroidea	Valvatida	Ophidiasteridae	Hacelia	Hacelia attenuata	Gray, 1840	Hacelia attenuata Gray, 1840
586	MIB	Adriatic Sea	Otranto	40.1288590	18.520781	Echinodermata	Asteroidea	Valvatida	Ophidiasteridae	Ophidiaster	Ophidiaster ophidianus	(Lamarck, 1816)	Ophidiaster ophidianus (Lamarck, 1816)
586	MAB	Adriatic Sea	Otranto	40.12885900	18.520781	Echinodermata	Asteroidea	Valvatida	Ophidiasteridae	Ophidiaster	Ophidiaster ophidianus	(Lamarck, 1816)	Ophidiaster ophidianus (Lamarck, 1816)
587	MAB	Adriatic Sea	San Foca	40.32417820	18.46629286	Echinodermata	Crinoidea	Comatulida	Antedonidae	Antedon	Antedon mediterranea	(Lamarck, 1816)	Antedon mediterranea (Lamarck, 1816)
587	MIB	Adriatic Sea	Monopoli	40.98221667	17.28620278	Echinodermata	Crinoidea	Comatulida	Antedonidae	Antedon	Antedon mediterranea	(Lamarck, 1816)	Antedon mediterranea (Lamarck, 1816)
588	MAB	Adriatic Sea	Monopoli	40.98221667	17.28620278	Echinodermata	Echinoidea	Arbacioida	Arbaciidae	Arbacia	Arbacia lixula	(Linnaeus, 1758)	Arbacia lixula (Linnaeus, 1758)
589	MAB	Adriatic Sea	Otranto	40.12885900	18.520781	Echinodermata	Echinoidea	Camarodonta	Toxopneustidae	Sphaerechinus	Sphaerechinus granularis	(Lamarck, 1816)	Sphaerechinus granularis (Lamarck, 1816)
590	MIB	Adriatic Sea	Otranto	40.1288590	18.520781	Echinodermata	Echinoidea	Diadematoida	Diadematidae	Centrostephanus	Centrostephanus	(Philippi, 1845)	Centrostephanus longispinus (Philippi, 1845)
590	MIB	Ionian Sea	Santa Maria di Leuca	39.73114575	18.347193	Echinodermata	Echinoidea	Diadematoida	Diadematidae	Centrostephanus	Centrostephanus	(Philippi, 1845)	Centrostephanus longispinus (Philippi, 1845)
590	MIB	Adriatic Sea	San Foca	40.3241782	18.4662928	Echinodermata	Echinoidea	Diadematoida	Diadematidae	Centrostephanus	Centrostephanus	(Philippi, 1845)	Centrostephanus longispinus (Philippi, 1845)
591	MIB	Adriatic Sea	Capitolo	40.94719344	17.449318	Echinodermata	Holothuroidea	Holothuriida	Holothuriidae	Holothuria	Holothuria (Platyperona) sanctori	Delle Chiaje, 1823	Holothuria (Platyperona) sanctori Delle Chiaje, 1823
592	MAB	Adriatic Sea	Capitolo	40.94719344	17.449318	Echinodermata	Holothuroidea	Synallactida	Stichopodidae	Parastichopus	Parastichopus regalis	(Cuvier, 1817)	Parastichopus regalis (Cuvier, 1817)
592	MAB	Adriatic Sea	Monopoli	40.98221667	17.28620278	Echinodermata	Holothuroidea	Synallactida	Stichopodidae	Parastichopus	Parastichopus regalis	(Cuvier, 1817)	Parastichopus regalis (Cuvier, 1817)
593	MAB	Adriatic Sea	San Foca	40.32417820	18.46629286	Echinodermata	Ophiuroidea	Amphilepidida	Ophiotrichidae	Ophiothrix	Ophiothrix fragilis	(Abildgaard in O.F. Müller, 1789)	Ophiothrix fragilis (Abildgaard in O.F. Müller, 1789)
593	MAB	Adriatic Sea	Monopoli	40.98221667	17.28620278	Echinodermata	Ophiuroidea	Amphilepidida	Ophiotrichidae	Ophiothrix	Ophiothrix fragilis	(Abildgaard in O.F. Müller, 1789)	Ophiothrix fragilis (Abildgaard in O.F. Müller, 1789)
593	MAB	Adriatic Sea	Capitolo	40.94719344	17.449318	Echinodermata	Ophiuroidea	Amphilepidida	Ophiotrichidae	Ophiothrix	Ophiothrix fragilis	(Abildgaard in O.F. Müller, 1789)	Ophiothrix fragilis (Abildgaard in O.F. Müller, 1789)
593	MAB	Adriatic Sea	Otranto	40.12885900	18.520781	Echinodermata	Ophiuroidea	Amphilepidida	Ophiotrichidae	Ophiothrix	Ophiothrix fragilis	(Abildgaard in O.F. Müller, 1789)	Ophiothrix fragilis (Abildgaard in O.F. Müller, 1789)
593	MAB	Ionian Sea	Santa Maria di Leuca	39.73114575	18.347193	Echinodermata	Ophiuroidea	Amphilepidida	Ophiotrichidae	Ophiothrix	Ophiothrix fragilis	(Abildgaard in O.F. Müller, 1789)	Ophiothrix fragilis (Abildgaard in O.F. Müller, 1789)
593	MAB	Adriatic Sea	Tremiti	42.1382530	15.52244	Echinodermata	Ophiuroidea	Amphilepidida	Ophiotrichidae	Ophiothrix	Ophiothrix fragilis	(Abildgaard in O.F. Müller, 1789)	Ophiothrix fragilis (Abildgaard in O.F. Müller, 1789)
593	MIB	Adriatic Sea	Monopoli	40.98221667	17.28620278	Echinodermata	Ophiuroidea	Amphilepidida	Ophiotrichidae	Ophiothrix	Ophiothrix fragilis	(Abildgaard in O.F. Müller, 1789)	Ophiothrix fragilis (Abildgaard in O.F. Müller, 1789)
593	MIB	Adriatic Sea	Tremiti	42.13825300	15.522442	Echinodermata	Ophiuroidea	Amphilepidida	Ophiotrichidae	Ophiothrix	Ophiothrix fragilis	(Abildgaard in O.F. Müller, 1789)	Ophiothrix fragilis (Abildgaard in O.F. Müller, 1789)
594	MAB	Adriatic Sea	Tremiti	42.1382530	15.52244	Echinodermata	Ophiuroidea	Ophiacanthida	Ophiodermatidae	Ophioderma	Ophioderma longicaudum	(Bruzelius, 1805)	Ophioderma longicaudum (Bruzelius, 1805)
594	MAB	Adriatic Sea	Monopoli	40.98221667	17.28620278	Echinodermata	Ophiuroidea	Ophiacanthida	Ophiodermatidae	Ophioderma	Ophioderma longicaudum	(Bruzelius, 1805)	Ophioderma longicaudum (Bruzelius, 1805)
594	MAB	Adriatic Sea	San Foca	40.32417820	18.46629286	Echinodermata	Ophiuroidea	Ophiacanthida	Ophiodermatidae	Ophioderma	Ophioderma longicaudum	(Bruzelius, 1805)	Ophioderma longicaudum (Bruzelius, 1805)
594	MAB	Adriatic Sea	Otranto	40.12885900	18.520781	Echinodermata	Ophiuroidea	Ophiacanthida	Ophiodermatidae	Ophioderma	Ophioderma longicaudum	(Bruzelius, 1805)	Ophioderma longicaudum (Bruzelius, 1805)
594	MAB	Ionian Sea	Santa Maria di Leuca	39.73114575	18.347193	Echinodermata	Ophiuroidea	Ophiacanthida	Ophiodermatidae	Ophioderma	Ophioderma longicaudum	(Bruzelius, 1805)	Ophioderma longicaudum (Bruzelius, 1805)
594	MAB	Adriatic Sea	Capitolo	40.94719344	17.449318	Echinodermata	Ophiuroidea	Ophiacanthida	Ophiodermatidae	Ophioderma	Ophioderma longicaudum	(Bruzelius, 1805)	Ophioderma longicaudum (Bruzelius, 1805)
594	MIB	Adriatic Sea	Tremiti	42.13825300	15.522442	Echinodermata	Ophiuroidea	Ophiacanthida	Ophiodermatidae	Ophioderma	Ophioderma longicaudum	(Bruzelius, 1805)	Ophioderma longicaudum (Bruzelius, 1805)
594	MIB	Adriatic Sea	Monopoli	40.98221667	17.28620278	Echinodermata	Ophiuroidea	Ophiacanthida	Ophiodermatidae	Ophioderma	Ophioderma longicaudum	(Bruzelius, 1805)	Ophioderma longicaudum (Bruzelius, 1805)
594	MIB	Adriatic Sea	Capitolo	40.94719344	17.449318	Echinodermata	Ophiuroidea	Ophiacanthida	Ophiodermatidae	Ophioderma	Ophioderma longicaudum	(Bruzelius, 1805)	Ophioderma longicaudum (Bruzelius, 1805)
594	MIB	Adriatic Sea	San Foca	40.3241782	18.4662928	Echinodermata	Ophiuroidea	Ophiacanthida	Ophiodermatidae	Ophioderma	Ophioderma longicaudum	(Bruzelius, 1805)	Ophioderma longicaudum (Bruzelius, 1805)
594	MIB	Adriatic Sea	Otranto	40.1288590	18.520781	Echinodermata	Ophiuroidea	Ophiacanthida	Ophiodermatidae	Ophioderma	Ophioderma longicaudum	(Bruzelius, 1805)	Ophioderma longicaudum (Bruzelius, 1805)
594	MIB	Ionian Sea	Santa Maria di Leuca	39.73114575	18.347193	Echinodermata	Ophiuroidea	Ophiacanthida	Ophiodermatidae	Ophioderma	Ophioderma longicaudum	(Bruzelius, 1805)	Ophioderma longicaudum (Bruzelius, 1805)
595	MIB	Adriatic Sea	Otranto	40.1288590	18.520781	Chordata	Ascidiacea	Aplousobranchia	Clavelinidae	Clavelina	Clavelina dellavallei	(Zirpolo, 1925)	Clavelina dellavallei (Zirpolo, 1925)
595	MIB	Ionian Sea	Santa Maria di Leuca	39.73114575	18.347193	Chordata	Ascidiacea	Aplousobranchia	Clavelinidae	Clavelina	Clavelina dellavallei	(Zirpolo, 1925)	Clavelina dellavallei (Zirpolo, 1925)
595	MIB	Adriatic Sea	Tremiti	42.13825300	15.522442	Chordata	Ascidiacea	Aplousobranchia	Clavelinidae	Clavelina	Clavelina dellavallei	(Zirpolo, 1925)	Clavelina dellavallei (Zirpolo, 1925)
595	MIB	Adriatic Sea	San Foca	40.3241782	18.4662928	Chordata	Ascidiacea	Aplousobranchia	Clavelinidae	Clavelina	Clavelina dellavallei	(Zirpolo, 1925)	Clavelina dellavallei (Zirpolo, 1925)
596	MAB	Adriatic Sea	Tremiti	42.1382530	15.52244	Chordata	Ascidiacea	Aplousobranchia	Diazonidae	Diazona	Diazona violacea	Savigny, 1816	Diazona violacea Savigny, 1816
597	MIB	Adriatic Sea	Otranto	40.1288590	18.520781	Chordata	Ascidiacea	Aplousobranchia	Polycitoridae	Cystodytes	Cystodytes dellechiajei	(Della Valle, 1877)	Cystodytes dellechiajei (Della Valle, 1877)
597	MIB	Ionian Sea	Santa Maria di Leuca	39.73114575	18.347193	Chordata	Ascidiacea	Aplousobranchia	Polycitoridae	Cystodytes	Cystodytes dellechiajei	(Della Valle, 1877)	Cystodytes dellechiajei (Della Valle, 1877)
597	MIB	Adriatic Sea	San Foca	40.3241782	18.4662928	Chordata	Ascidiacea	Aplousobranchia	Polycitoridae	Cystodytes	Cystodytes dellechiajei	(Della Valle, 1877)	Cystodytes dellechiajei (Della Valle, 1877)
598	MAB	Adriatic Sea	Otranto	40.12885900	18.520781	Chordata	Ascidiacea	Aplousobranchia	Polyclinidae	Aplidium	Aplidium conicum	(Olivi, 1792)	Aplidium conicum (Olivi, 1792)
598	MAB	Ionian Sea	Santa Maria di Leuca	39.73114575	18.347193	Chordata	Ascidiacea	Aplousobranchia	Polyclinidae	Aplidium	Aplidium conicum	(Olivi, 1792)	Aplidium conicum (Olivi, 1792)
598	MAB	Adriatic Sea	Capitolo	40.94719344	17.449318	Chordata	Ascidiacea	Aplousobranchia	Polyclinidae	Aplidium	Aplidium conicum	(Olivi, 1792)	Aplidium conicum (Olivi, 1792)
598	MAB	Adriatic Sea	Tremiti	42.1382530	15.52244	Chordata	Ascidiacea	Aplousobranchia	Polyclinidae	Aplidium	Aplidium conicum	(Olivi, 1792)	Aplidium conicum (Olivi, 1792)
598	MAB	Adriatic Sea	San Foca	40.32417820	18.46629286	Chordata	Ascidiacea	Aplousobranchia	Polyclinidae	Aplidium	Aplidium conicum	(Olivi, 1792)	Aplidium conicum (Olivi, 1792)
599	MIB	Adriatic Sea	Otranto	40.1288590	18.520781	Chordata	Ascidiacea	Stolidobranchia	Pyuridae	Halocynthia	Halocynthia papillosa	(Linnaeus, 1767)	Halocynthia papillosa (Linnaeus, 1767)
599	MIB	Adriatic Sea	Monopoli	40.98221667	17.28620278	Chordata	Ascidiacea	Stolidobranchia	Pyuridae	Halocynthia	Halocynthia papillosa	(Linnaeus, 1767)	Halocynthia papillosa (Linnaeus, 1767)
599	MIB	Adriatic Sea	Capitolo	40.94719344	17.449318	Chordata	Ascidiacea	Stolidobranchia	Pyuridae	Halocynthia	Halocynthia papillosa	(Linnaeus, 1767)	Halocynthia papillosa (Linnaeus, 1767)
599	MAB	Adriatic Sea	Otranto	40.12885900	18.520781	Chordata	Ascidiacea	Stolidobranchia	Pyuridae	Halocynthia	Halocynthia papillosa	(Linnaeus, 1767)	Halocynthia papillosa (Linnaeus, 1767)
599	MAB	Ionian Sea	Santa Maria di Leuca	39.73114575	18.347193	Chordata	Ascidiacea	Stolidobranchia	Pyuridae	Halocynthia	Halocynthia papillosa	(Linnaeus, 1767)	Halocynthia papillosa (Linnaeus, 1767)
599	MAB	Adriatic Sea	Capitolo	40.94719344	17.449318	Chordata	Ascidiacea	Stolidobranchia	Pyuridae	Halocynthia	Halocynthia papillosa	(Linnaeus, 1767)	Halocynthia papillosa (Linnaeus, 1767)
599	MAB	Adriatic Sea	Tremiti	42.1382530	15.52244	Chordata	Ascidiacea	Stolidobranchia	Pyuridae	Halocynthia	Halocynthia papillosa	(Linnaeus, 1767)	Halocynthia papillosa (Linnaeus, 1767)
599	MAB	Adriatic Sea	San Foca	40.32417820	18.46629286	Chordata	Ascidiacea	Stolidobranchia	Pyuridae	Halocynthia	Halocynthia papillosa	(Linnaeus, 1767)	Halocynthia papillosa (Linnaeus, 1767)
600	MAB	Adriatic Sea	Monopoli	40.98221667	17.28620278	Arthropoda	Malacostraca	Decapoda	Inachidae	Achaeus	Achaeus cranchii	Leach, 1817	Achaeus cranchii Leach, 1817
601	MAB	Adriatic Sea	Monopoli	40.98221667	17.28620278	Arthropoda	Malacostraca	Decapoda	Alpheidae	Alpheus	Alpheus dentipes	Guérin, 1832	Alpheus dentipes Guérin, 1832
601	MAB	Ionian Sea	Santa Maria di Leuca	39.73114575	18.347193	Arthropoda	Malacostraca	Decapoda	Alpheidae	Alpheus	Alpheus dentipes	Guérin, 1832	Alpheus dentipes Guérin, 1832
601	MAB	Adriatic Sea	Tremiti	42.1382530	15.52244	Arthropoda	Malacostraca	Decapoda	Alpheidae	Alpheus	Alpheus dentipes	Guérin, 1832	Alpheus dentipes Guérin, 1832
601	MAB	Adriatic Sea	Capitolo	40.94719344	17.449318	Arthropoda	Malacostraca	Decapoda	Alpheidae	Alpheus	Alpheus dentipes	Guérin, 1832	Alpheus dentipes Guérin, 1832
601	MAB	Adriatic Sea	Otranto	40.12885900	18.520781	Arthropoda	Malacostraca	Decapoda	Alpheidae	Alpheus	Alpheus dentipes	Guérin, 1832	Alpheus dentipes Guérin, 1832
602	MAB	Adriatic Sea	Monopoli	40.98221667	17.28620278	Arthropoda	Malacostraca	Decapoda	Paguridae	Anapagurus	Anapagurus chiroacanthus	(Liljeborg, 1856)	Anapagurus chiroacanthus (Liljeborg, 1856)
603	MAB	Adriatic Sea	Monopoli	40.98221667	17.28620278	Arthropoda	Malacostraca	Decapoda	Alpheidae	Athanas	Athanas nitescens	(Leach, 1814)	Athanas nitescens (Leach, 1814)
603	MAB	Adriatic Sea	Capitolo	40.94719344	17.449318	Arthropoda	Malacostraca	Decapoda	Alpheidae	Athanas	Athanas nitescens	(Leach, 1814)	Athanas nitescens (Leach, 1814)
603	MAB	Adriatic Sea	Otranto	40.12885900	18.520781	Arthropoda	Malacostraca	Decapoda	Alpheidae	Athanas	Athanas nitescens	(Leach, 1814)	Athanas nitescens (Leach, 1814)
604	MAB	Adriatic Sea	Monopoli	40.98221667	17.28620278	Arthropoda	Malacostraca	Decapoda	Varunidae	Brachynotus	Brachynotus	De Haan, 1833	Brachynotus De Haan, 1833
605	MAB	Adriatic Sea	Tremiti	42.1382530	15.52244	Arthropoda	Malacostraca	Decapoda	Carcinidae	Carcinus	Carcinus maenas	(Linnaeus, 1758)	Carcinus maenas (Linnaeus, 1758)
606	MAB	Adriatic Sea	Capitolo	40.94719344	17.449318	Arthropoda	Malacostraca	Decapoda	Galatheidae	Galathea	Galathea bolivari	Zariquiey Álvarez, 1950	Galathea bolivari Zariquiey Álvarez, 1950
607	MAB	Adriatic Sea	Monopoli	40.98221667	17.28620278	Arthropoda	Malacostraca	Decapoda	Thoridae	Eualus	Eualus	Thallwitz, 1891	Eualus Thallwitz, 1891
607	MAB	Ionian Sea	Santa Maria di Leuca	39.73114575	18.347193	Arthropoda	Malacostraca	Decapoda	Thoridae	Eualus	Eualus	Thallwitz, 1891	Eualus Thallwitz, 1891
607	MAB	Adriatic Sea	Capitolo	40.94719344	17.449318	Arthropoda	Malacostraca	Decapoda	Thoridae	Eualus	Eualus	Thallwitz, 1891	Eualus Thallwitz, 1891
607	MAB	Adriatic Sea	Otranto	40.12885900	18.520781	Arthropoda	Malacostraca	Decapoda	Thoridae	Eualus	Eualus	Thallwitz, 1891	Eualus Thallwitz, 1891
608	MAB	Ionian Sea	Santa Maria di Leuca	39.73114575	18.347193	Arthropoda	Malacostraca	Decapoda	Paguridae	Pagurus	Pagurus chevreuxi	(Bouvier, 1896)	Pagurus chevreuxi (Bouvier, 1896)
609	MAB	Adriatic Sea	Monopoli	40.98221667	17.28620278	Arthropoda	Malacostraca	Decapoda	Palaemonidae	Periclimenes	Periclimenes amethysteus	(Risso, 1827)	Periclimenes amethysteus (Risso, 1827)
609	MAB	Adriatic Sea	Otranto	40.12885900	18.520781	Arthropoda	Malacostraca	Decapoda	Palaemonidae	Periclimenes	Periclimenes amethysteus	(Risso, 1827)	Periclimenes amethysteus (Risso, 1827)
610	MAB	Adriatic Sea	Monopoli	40.98221667	17.28620278	Arthropoda	Malacostraca	Decapoda	Pilumnidae	Pilumnus	Pilumnus spinifer	H. Milne Edwards, 1834	Pilumnus spinifer H. Milne Edwards, 1834
611	MAB	Adriatic Sea	Monopoli	40.98221667	17.28620278	Arthropoda	Malacostraca	Decapoda	Pilumnidae	Pilumnus	Pilumnus villosissimus	(Rafinesque, 1814)	Pilumnus villosissimus (Rafinesque, 1814)
611	MAB	Ionian Sea	Santa Maria di Leuca	39.73114575	18.347193	Arthropoda	Malacostraca	Decapoda	Pilumnidae	Pilumnus	Pilumnus villosissimus	(Rafinesque, 1814)	Pilumnus villosissimus (Rafinesque, 1814)
611	MIB	Adriatic Sea	San Foca	40.3241782	18.4662928	Arthropoda	Malacostraca	Decapoda	Pilumnidae	Pilumnus	Pilumnus villosissimus	(Rafinesque, 1814)	Pilumnus villosissimus (Rafinesque, 1814)
611	MIB	Adriatic Sea	Tremiti	42.13825300	15.522442	Arthropoda	Malacostraca	Decapoda	Pilumnidae	Pilumnus	Pilumnus villosissimus	(Rafinesque, 1814)	Pilumnus villosissimus (Rafinesque, 1814)
611	MAB	Adriatic Sea	Tremiti	42.1382530	15.52244	Arthropoda	Malacostraca	Decapoda	Pilumnidae	Pilumnus	Pilumnus villosissimus	(Rafinesque, 1814)	Pilumnus villosissimus (Rafinesque, 1814)
611	MAB	Adriatic Sea	Capitolo	40.94719344	17.449318	Arthropoda	Malacostraca	Decapoda	Pilumnidae	Pilumnus	Pilumnus villosissimus	(Rafinesque, 1814)	Pilumnus villosissimus (Rafinesque, 1814)
612	MIB	Adriatic Sea	Tremiti	42.13825300	15.522442	Arthropoda	Malacostraca	Decapoda	Porcellanidae	Pisidia	Pisidia bluteli	(Risso, 1816)	Pisidia bluteli (Risso, 1816)
613	MAB	Adriatic Sea	Monopoli	40.98221667	17.28620278	Arthropoda	Malacostraca	Decapoda	Alpheidae	Synalpheus	Synalpheus gambarelloides	(Nardo, 1847)	Synalpheus gambarelloides (Nardo, 1847)
613	MAB	Ionian Sea	Santa Maria di Leuca	39.73114575	18.347193	Arthropoda	Malacostraca	Decapoda	Alpheidae	Synalpheus	Synalpheus gambarelloides	(Nardo, 1847)	Synalpheus gambarelloides (Nardo, 1847)
613	MAB	Adriatic Sea	Tremiti	42.1382530	15.52244	Arthropoda	Malacostraca	Decapoda	Alpheidae	Synalpheus	Synalpheus gambarelloides	(Nardo, 1847)	Synalpheus gambarelloides (Nardo, 1847)
613	MAB	Adriatic Sea	Capitolo	40.94719344	17.449318	Arthropoda	Malacostraca	Decapoda	Alpheidae	Synalpheus	Synalpheus gambarelloides	(Nardo, 1847)	Synalpheus gambarelloides (Nardo, 1847)
614	MIB	Adriatic Sea	Tremiti	42.13825300	15.522442	Arthropoda	Malacostraca	Decapoda	Lysmatidae	Lysmata	Lysmata seticaudata	(Risso, 1816)	Lysmata seticaudata (Risso, 1816)
615	MAB	Adriatic Sea	Otranto	40.12885900	18.520781	Arthropoda	Malacostraca	Decapoda	Nephropidae	Homarus	Homarus gammarus	(Linnaeus, 1758)	Homarus gammarus (Linnaeus, 1758)
616	MAB	Adriatic Sea	Tremiti	42.1382530	15.52244	Arthropoda	Malacostraca	Decapoda	Palinuridae	Palinurus	Palinurus elephas	(Fabricius, 1787)	Palinurus elephas (Fabricius, 1787)
616	MAB	Adriatic Sea	Otranto	40.12885900	18.520781	Arthropoda	Malacostraca	Decapoda	Palinuridae	Palinurus	Palinurus elephas	(Fabricius, 1787)	Palinurus elephas (Fabricius, 1787)
616	MIB	Ionian Sea	Santa Maria di Leuca	39.73114575	18.347193	Arthropoda	Malacostraca	Decapoda	Palinuridae	Palinurus	Palinurus elephas	(Fabricius, 1787)	Palinurus elephas (Fabricius, 1787)
616	MIB	Adriatic Sea	San Foca	40.3241782	18.4662928	Arthropoda	Malacostraca	Decapoda	Palinuridae	Palinurus	Palinurus elephas	(Fabricius, 1787)	Palinurus elephas (Fabricius, 1787)
617	MAB	Adriatic Sea	Capitolo	40.94719344	17.449318	Arthropoda	Malacostraca	Decapoda	Scyllaridae	Scyllarides	Scyllarus arctus	(Linnaeus, 1758)	Scyllarus arctus (Linnaeus, 1758)
617	MAB	Adriatic Sea	Otranto	40.12885900	18.520781	Arthropoda	Malacostraca	Decapoda	Scyllaridae	Scyllarides	Scyllarus arctus	(Linnaeus, 1758)	Scyllarus arctus (Linnaeus, 1758)
617	MAB	Adriatic Sea	Santa Maria di Leuca	39.73114575	18.347193	Arthropoda	Malacostraca	Decapoda	Scyllaridae	Scyllarides	Scyllarus arctus	(Linnaeus, 1758)	Scyllarus arctus (Linnaeus, 1758)
617	MAB	Adriatic Sea	San Foca	40.32417820	18.46629286	Arthropoda	Malacostraca	Decapoda	Scyllaridae	Scyllarides	Scyllarus arctus	(Linnaeus, 1758)	Scyllarus arctus (Linnaeus, 1758)
618	MAB	Adriatic Sea	Tremiti	42.1382530	15.52244	Arthropoda	Malacostraca	Decapoda	Scyllaridae	Scyllarides	Scyllarides latus	(Latreille, 1803)	Scyllarides latus (Latreille, 1803)
618	MIB	Adriatic Sea	Tremiti	42.13825300	15.522442	Arthropoda	Malacostraca	Decapoda	Scyllaridae	Scyllarides	Scyllarides latus	(Latreille, 1803)	Scyllarides latus (Latreille, 1803)
618	MAB	Adriatic Sea	Monopoli	40.98221667	17.28620278	Arthropoda	Malacostraca	Decapoda	Scyllaridae	Scyllarides	Scyllarides latus	(Latreille, 1803)	Scyllarides latus (Latreille, 1803)
618	MAB	Ionian Sea	Santa Maria di Leuca	39.73114575	18.347193	Arthropoda	Malacostraca	Decapoda	Scyllaridae	Scyllarides	Scyllarides latus	(Latreille, 1803)	Scyllarides latus (Latreille, 1803)
619	MAB	Adriatic Sea	Monopoli	40.98221667	17.28620278	Arthropoda	Malacostraca	Decapoda	Diogenidae	Dardanus	Dardanus calidus	(Risso, 1827)	Dardanus calidus (Risso, 1827)
619	MAB	Adriatic Sea	Otranto	40.12885900	18.520781	Arthropoda	Malacostraca	Decapoda	Diogenidae	Dardanus	Dardanus calidus	(Risso, 1827)	Dardanus calidus (Risso, 1827)
620	MIB	Adriatic Sea	Tremiti	42.13825300	15.522442	Arthropoda	Malacostraca	Tanaidacea	Apseudidae	Apseudes	Apseudes holthuisi	Bacescu, 1961	Apseudes holthuisi Bacescu, 1961
621	MAB	Adriatic Sea	Monopoli	40.98221667	17.28620278	Arthropoda	Malacostraca	Tanaidacea	Apseudidae	Apseudes	Paradoxapseudes intermedius	(Hansen, 1895)	Paradoxapseudes intermedius (Hansen, 1895)
621	MAB	Adriatic Sea	Capitolo	40.94719344	17.449318	Arthropoda	Malacostraca	Tanaidacea	Apseudidae	Apseudes	Paradoxapseudes intermedius	(Hansen, 1895)	Paradoxapseudes intermedius (Hansen, 1895)
622	MAB	Adriatic Sea	Monopoli	40.98221667	17.28620278	Arthropoda	Malacostraca	Tanaidacea	Leptocheliidae	Chondrochelia	Chondrochelia savignyi	(Kroyer, 1842)	Chondrochelia savignyi (Kroyer, 1842)
623	MAB	Adriatic Sea	Monopoli	40.98221667	17.28620278	Arthropoda	Malacostraca	Tanaidacea	Leptocheliidae	Heterotanais	Heterotanais oerstedii	(Krøyer, 1842)	Heterotanais oerstedii (Krøyer, 1842)
624	MAB	Adriatic Sea	Monopoli	40.98221667	17.28620278	Arthropoda	Malacostraca	Cumacea	Nannastacidae	Cumella	Cumella (Cumella) limicola	Sars, 1879	Cumella (Cumella) limicola Sars, 1879
625	MAB	Adriatic Sea	Monopoli	40.98221667	17.28620278	Arthropoda	Malacostraca	Cumacea	Bodotriidae	Iphinoe	Iphinoe trispinosa	(Goodsir, 1843)	Iphinoe trispinosa (Goodsir, 1843)
626	MAB	Adriatic Sea	Monopoli	40.98221667	17.28620278	Arthropoda	Malacostraca	Isopoda	Janiridae	Janira	Janira maculosa	Leach, 1814	Janira maculosa Leach, 1814
627	MAB	Adriatic Sea	Monopoli	40.98221667	17.28620278	Arthropoda	Malacostraca	Isopoda	Gnathiidae	Gnathia	Gnathia illepidus	(Wagner, 1869)	Gnathia illepidus (Wagner, 1869)
628	MAB	Adriatic Sea	Otranto	40.12885900	18.520781	Arthropoda	Malacostraca	Isopoda	Anthuridae	Mesanthura	Mesanthura	Barnard, 1914	Mesanthura Barnard, 1914
629	MAB	Adriatic Sea	Monopoli	40.98221667	17.28620278	Arthropoda	Malacostraca	Isopoda	Hyssuridae	Neohyssura	Neohyssura spinicauda	(Walker, 1901)	Neohyssura spinicauda (Walker, 1901)
630	MAB	Adriatic Sea	Monopoli	40.98221667	17.28620278	Arthropoda	Malacostraca	Amphipoda	Maeridae	Elasmopus	Elasmopus	Costa, 1853	Elasmopus Costa, 1853
631	MAB	Adriatic Sea	Monopoli	40.98221667	17.28620278	Arthropoda	Malacostraca	Amphipoda	Phoxocephalidae	Harpinia	Harpinia truncata	Sars, 1891	Harpinia truncata Sars, 1891
632	MAB	Adriatic Sea	Monopoli	40.98221667	17.28620278	Arthropoda	Malacostraca	Amphipoda	Corophiidae	Leptocheirus	Leptocheirus pilosus	Zaddach, 1844	Leptocheirus pilosus Zaddach, 1844
633	MAB	Adriatic Sea	Monopoli	40.98221667	17.28620278	Arthropoda	Malacostraca	Amphipoda	Lysianassidae	Lysianassa	Lysianassa costae	H. Milne Edwards, 1830	Lysianassa costae H. Milne Edwards, 1830
634	MAB	Adriatic Sea	Monopoli	40.98221667	17.28620278	Arthropoda	Malacostraca	Amphipoda	Lysianassidae	Lysianassa	Lysianassina longicornis	(Lucas, 1846)	Lysianassina longicornis (Lucas, 1846)
635	MAB	Adriatic Sea	Capitolo	40.94719344	17.449318	Arthropoda	Malacostraca	Amphipoda	Lysianassidae	Lysianassa	Lysianassa pilicornis	Heller, 1866	Lysianassa pilicornis Heller, 1866
636	MAB	Adriatic Sea	Monopoli	40.98221667	17.28620278	Arthropoda	Malacostraca	Amphipoda	Lysianassidae	Lysianassa	Lysianassa	H. Milne Edwards, 1830	Lysianassa H. Milne Edwards, 1830
637	MAB	Adriatic Sea	Monopoli	40.98221667	17.28620278	Arthropoda	Malacostraca	Amphipoda	Photidae	Megamphopus	Megamphopus brevidactylus	Myers, 1976	Megamphopus brevidactylus Myers, 1976
638	MAB	Adriatic Sea	Monopoli	40.98221667	17.28620278	Arthropoda	Malacostraca	Amphipoda	Oedicerotidae	Monoculodes	Deflexilodes subnudus	(Norman, 1889)	Deflexilodes subnudus (Norman, 1889)
639	MAB	Adriatic Sea	Monopoli	40.98221667	17.28620278	Arthropoda	Malacostraca	Amphipoda	Aoridae	Microdeutopus	Microdeutopus algicola	Della Valle, 1893	Microdeutopus algicola Della Valle, 1893
640	MAB	Adriatic Sea	Monopoli	40.98221667	17.28620278	Arthropoda	Malacostraca	Amphipoda	Caprellidae	Phtisica	Phtisica marina	Slabber, 1769	Phtisica marina Slabber, 1769
641	MAB	Ionian Sea	Santa Maria di Leuca	39.73114575	18.347193	Arthropoda	Malacostraca	Amphipoda	Stenothoidae	Stenothoe	Stenothoe dollfusi	Chevreux, 1887	Stenothoe dollfusi Chevreux, 1887
642	MAB	Adriatic Sea	Monopoli	40.98221667	17.28620278	Arthropoda	Malacostraca	Amphipoda	Oedicerotidae	Synchelidium	Synchelidium haplocheles	(Grube, 1864)	Synchelidium haplocheles (Grube, 1864)
643	MAB	Adriatic Sea	Monopoli	40.98221667	17.28620278	Arthropoda	Malacostraca	Mysidacea			Mysida	Boas, 1883	Mysida Boas, 1883
644	MAB	Adriatic Sea	Monopoli	40.98221667	17.28620278	Arthropoda	Copepoda	Harpacticoida			Harpacticoida	Sars G.O., 1903	Harpacticoida Sars G.O., 1903
645	MAB	Adriatic Sea	Monopoli	40.98221667	17.28620278	Arthropoda	Pycnogonida	Pantopoda	Ammotheidae	Achelia	Achelia echinata	Hodge, 1864	Achelia echinata Hodge, 1864
646	MAB	Adriatic Sea	Monopoli	40.98221667	17.28620278	Arthropoda	Pycnogonida	Pantopoda			Pantopoda	Gerstaecker, 1863	Pantopoda Gerstaecker, 1863
647	MAB	Ionian Sea	Santa Maria di Leuca	39.73114575	18.347193	Arthropoda	Pycnogonida	Pantopoda			Pantopoda	Gerstaecker, 1863	Pantopoda Gerstaecker, 1863
648	MIB	Adriatic Sea	Monopoli	40.98221667	17.28620278	Arthropoda	Thecostraca	Verrucomorpha	Verrucidae	Verruca	Verruca stroemia	(O.F. Müller, 1776)	Verruca stroemia (O.F. Müller, 1776)
